# Supplementary material
Source: PubMed Central journal article supplement (PMC3131951)

**Figure S8**

[DICER1 3'-UTR (S214311)]

ACTGCCGGGGGAACACCTGGATTCATGAACCAAAGCAGCCTCAAGTTTCATGTTGTCAAGGCAG  
GGTATCAGAATCTTTCTGAGGGCAAAGTATTATTAACAAATAAAAATATCAGTATTTTAAAAGA  
CAATTACAGGAGTGTAGAGGTCATTCTAAATTTTCATCACTTCACGTAATATAAAAAGAAAAAG  
AAAAGAAATATAACAAACATTTTAAAAACATAATTAAGAGTTCAGTTAACAAATCTGTTTCATA  
CTTTCACAAACAGTAAAAATGCCACAGACAAAAATGACCTATTTAAGTTGTGCGAGTATATGAC  
ACATTGCAGGCATTATAATTATCTTTTTTCAAATTCATAAATCAAACAGCAGCAAGGCCAAAC  
CACATTTTTCCCCTGTTTGGTGCTAATATTTTCTTGAAATGAGGTAAAGCATGGTACCAAGTGC

**Mir-29c**

AATGCTTATCTGTGCTACATGAACAGAACAGAAGGGAAAAAGCTATTATAAAAACGCAGCATAGT  
TAGGACTGCGGAAAGCATATTATAAAAAGAAATTTTAAAAAATTTACAAATGAAGGTTTCATGTTA  
ACTAACTTGCACACAATCATCATAAGGAATTTCTGCAGTTGCTTTTTCAAGACACGCCTCCCA  
GTCCTTTACACACGTGCTCAGGGCACAACCACACCCCACTGGTAGGTTTTCCATATTACATTG  
GTCTCACATTGCAATCACAGGAACACAGGGTGGCACACAGGGCTCTAAAGTGGGGCAACATAGA  
GTGATTTTTTTTTTCTTAATTGACAGATGCAAAACATTTCAACAAGCTAAACACAGGAAAAC  
TTACAGCATTAAAAATCAGCAGCACAAAAGCGTTCATAACCATTTTCATATGTCTAACTCGTACT  
TTTTTATTTTTTAACTCAGTAACCAGGGGATCACAGAATGCTTCAAACGTGAGTCAAATTTAAA  
ATCTACTATTTTTCTCCAACAAAAGTGAACCGCTGAAGTTTGTGTTGATAAAACATTTGAA  
TGGTAGAAGGAAATTTGAACCCCTGAGAATGTATGACCTAATCATGTCTAAGTTTGAACATCTT  
AGTATTAACAAAAAATACTCTTCTTAAGGTTACAAATATATTGAGGCATTTTTCTCCCACTGG  
GAATCATAACTGTGAAAACAATCTGATTTTTGGTGGCAGGAATCAAGAGAATCCCGTAACACTGG  
GATCAATGTATTAGACACAATGCAAAGCCCTAAGCTCCTGGCATCAGGTAGTTTATAAATATTA  
AGAGATTTGTGATTAACTTGATCACAAATCACCCCTCAGAATAAAATTCACATCCAGCCTTGT  
AACTGCACACTTTTACAGTTATATAATTCAAGAATTGCTTTGTTTTAACTGGTCATATCTTACA  
TTAAGGTTTTTTAAAAAATCAAATAGACATCTAAGGTTCCAAATCGGAATTAATATTTTTTAAA  
ACAAGTCACCTAATTTGCTCAAAAACCTCGTTTTAATAATTTAGATCTCAATTTAAGTTTAAGATT  
GGAGACAACAAAAAACAACACTGGAGAAGCTTAATACCCCCCTCACTCAGGGTTCCTTAGAAAGCAG  
AGCTGACAGTTTTCTGTGCGGTGCACTCGCACAGAGGCATTTCTCTGTGGGTGGATGATGCAGAT  
AAAGCAGGAAGGACAGTATTCAAATGTCACTTACATATAAATGCAGCATTCACGAAGCATCAA  
GTTTCAGAATCATGTGCTGGGAAATATGAGACACCTCTGCTCAGCTTTCTTAAACTTCAAGCATA  
ATTAACGGGGCAAATTGCAGCAAACCTCTACTGGTATGTTGATGGGAGTGCAAGACTGACCCAC  
AGCTTTTTAAAAAGGTAAATTAAGAGGTATTATAGTTACAGTGCAAAAAAAAAAAAAATTTAAATTT  
TCAAGCATAATACATAAACATAGCACCAAACAGGGGAAAAATGCATGCAAAAAGAAAAGAAGAAC  
TGAGGTATTTAAGTGAAGAGTGCCCTACAAGTCTAATTAAGAAACTTAGGCAAATGCCTAAAGA  
AGTTTTTTTTTTTTTCTTTTCCAAAGATGGAATAATGAGCTAGTTTATCTAAATTAATGACC  
TAAATCACAGATGTATCAAATTTACGGCAGTTTATCGCAAACGTTAAACTTTCACGGCATTAAC  
AGCACAGATAAGCATTGCACTTTATGCATGCAACATTATGAAAAGTATAGTAAGAAATTTATGT

**Mir-519a**

GAGGAGACTAAGGGTAAAGGTGCTGTGTTTTGCTTCTTAAATAAGTAACCAATCAATTATAAAA  
TCTGCAGCATATTTTAGGTGTGATATGTCTAAGGTTTATTTTGTAGAGCAACAGCCTAGAAGG  
CAAAATTTATTTGCCATAAACATTTCCATCAGTGGGAACTACCTGGCAGGAGGACTTTAGTAAA  
TGGGGTGTTTAGCCAAAGATCATTTTTATGATAAAAAATATCCGTAGACTACATATTTCTGGTTT  
TTAAAATGTTTGTATAATACATATGACAGAAATTTTAGTATGATCCTGTAATAAGTTACAACATA

**Mir-374a**

TACTAGTGAGTTGTAAGTATCACGCTGTCTCAACGTCTAATGCATAATAAAATGAAAGGAATGT  
AAAACAGTTTGTTCAAAAAGATCAGAGATTAAGACTATCCATGAAGGTTTCACTTTTAAAGGC  
AGAACCCTTTTTTATGCAAGACTATGTGGCATCAGAAAACATAAATGTGATTCACCAACATGC

CAGCCAATGTTTCATTAATAAATCTGTCCCTTACTATCAGGTGCAACAGCGACCGGGAACATCACC  
 TTACACAGTATAACGTGGAAAGAAAAGACAACATTGGCGCACTTCTCCTCTCGAAAACCTTATC  
 TTTCTATTTCAGCTTATCAACTACTGCAGGACTGGCACTACTGCACACACGGAGAGATGGAGAAG  
 AATCTACATCATCCTAGGGACTGCTGGAGGTTTAAAGCTCCATGGCCTTCTAACACTAAGCAAAG  
 CTGACATAAACTCAAAAAAAAAAAAAAAAAACAAAACCTGTCAATTATTTTGAGCACTTGCTAAATGTC  
 ATCATTAAGCACTCTTGTGATTTAAACAAAGCAGAAGTGAGGAAAGAAGATAAGATTGTGTTT  
 GCGCAAAAACCTAAAACCTACAATTAGTTCCAAAATTTGCAGTTACTGCACCTTGTTTTATTCTG

**Mir-18b**

TTATCTATCCTGTTATCAACCAAACCTTAAATTCTGCCTTCAATTCATTCCACTCACTAACAAC  
 TTTAAGTCTTCCTTTCCGATTTAAATAATTTTCCCCTTAATTTTTTTTTGTTTTGTTTCTTGTTT  
 TGAATTTTAAAAGCGTTTTAGCTATTGGGAACCTGAGGT

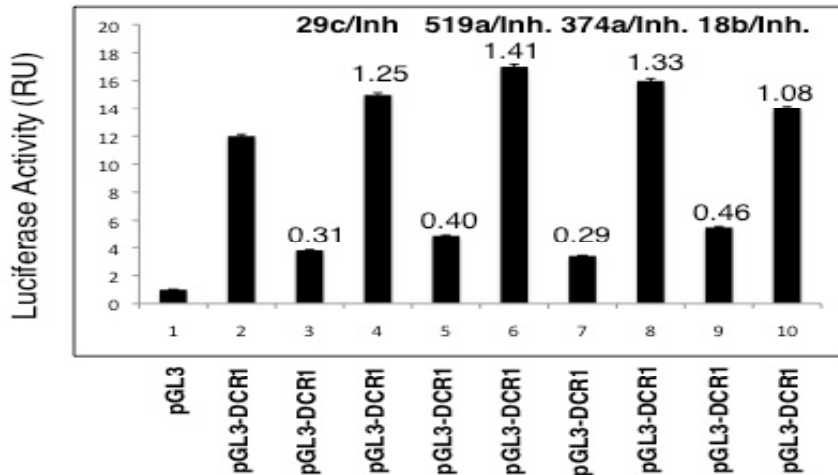

**Figure S9**

[DDIT1 3'- UTR (S204414)]

CCAGTGATTAATCTCCCTGAACGGTGATGGCATCTGAATGAAAATAACTGAACCAAATTGCACT  
 GAAGTTTTTTGAAATACCTTTGTAGTTACTCAAGCAGTTACTCCCTACACTGATGCAAGGATTAC  
 AGAACTGATGCCAAGGGGCTGAGTGAGTTCAACTACATGTTCTGGGGGCCCGGAGATAGATGA  
 CTTTGCAGATGGAAAGAGGTGAAAATGAAGAAGGAAGCTGTGTTGAAACAGAAAAATAAGTCAA  
 AAGGAACAAAAATTACAAAGAACCATGCAGGAAGGAAAACCTATGTATTAATTTAGAATGGTTGA  
 GTTACATTAATAAATAACCAAATATGTTAAAGTTTAAAGTGTGCAGCCATAGTTTGGGTATTTTG  
 GTTTATATGCCCTCAAGTAAAAGAAAAGCCGAAAGGGTTAATCATATTTGAAAACCATATTTTA  
 TTGTATTTTGATGAGATATTAATTTCTCAAAGTTTTATTATAAATTCTACTAAGTTATTTTATG

**Mir-374a**

ACATGAAAAGTTATTTATGCTATAAATTTTTTGAACACAATACCTACAATAAACTGGTATGAA  
 TAATTGCATCATTTCTTATTGTGTGCTCTTGTTCTTTTAACTTGTACTTTATTAAACACATTT  
 TACTGACGCTTTGCTG

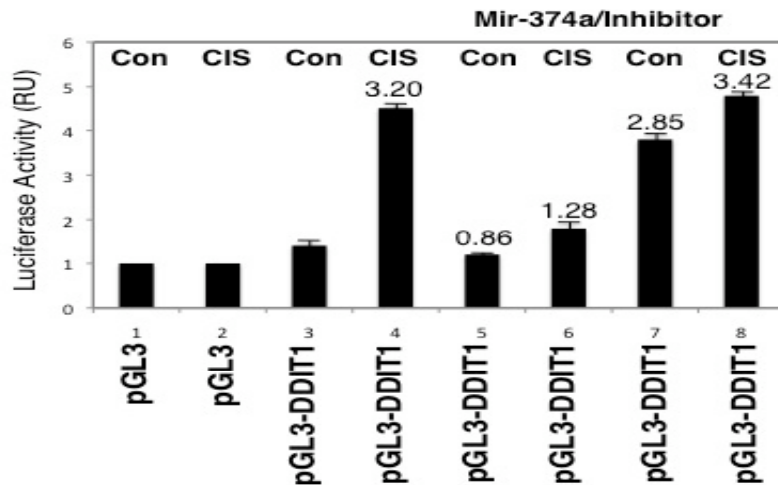

**Figure S10**

[DDIT4 3'- UTR (S206522)]

GGCCGGAGGAAGGTGAGCGGTGGGCGGGTGCCGACGCGACTCGAGGGGCCGGAAGGTGGGGAA  
 GCCCCGGTGCTGGAAGGGTCAGAGCCGCTTGGCTTCCTATCCCATCGGGACCCAGATTGCTT  
 GGGGGCAGGGGAATTGGAGTATAAGGTGAGTGAGGCGGAAACTGAGGCACGGAGTGGGAAGGA  
 GCGTTGGTTTTCTTAAGGAAACAGCACCTCCCCGCCTGTGCGTTTTCGTTTTGAAGCCGCTCTAA  
 TACCCCTTCTGTGTGCTCTCCTTTCCAGACACGGCTTACCTGGATGGGGTGTGCTTGCCCGAC  
 TTCGAGCTGCTCAGTGACCCTGAGGATGAACACTTGTGTGCCAACCTGATGCAGCTGCTGCAGG  
 AGAGCCTGGCCCAGGCGCGGCTGGGCTCTCGACGCCCTGCGCGCTGCTGATGCCTAGCCAGTT  
 GGTAAGCCAGGTGGGCAAAGAACTACTGCGCCTGGCCTACAGCGAGCCGTGCGGCCTGCGGGGG  
 GCGCTGCTGGACGTCTGCGTGGAGCAGGGCAAGAGCTGCCACAGCGTGGGCCAGCTGGCACTCG  
 ACCCCAGCCTGGTGCCACCTTCCAGCTGACCCTCGTGCTGCGCCTGGACTCACGACTCTGGCC  
 CAAGATCCAGGGGCTGTTTAGCTCCGCCAACTCTCCCTTCCCTGGCTTCAGCCAGTCCCTG  
 ACGCTGAGCACTGGCTTCCGAGTCATCAAGAAGAAGCTGTACAGCTCGGAACAGCTGCTCATTG  
 AGGAGTGTTGAACCTCAACCTGAGGGGGCCGACAGTGCCCTCCAAGACAGAGACGACTGAACTT  
 TTGGGGTGGAGACTAGAGGCAGGAGCTGAGGGACTGATTCCTGTGGTTGGAAAAGTGAAGCAGC  
 CACCTAAGGTGGAGGTGGGGGAATAGTGTTCACAGGAAGCTCATTGAGTTGTGTGCGGGTGGC  
 TGTGCATTGGGGACACATAACCCCTCAGTACTGTAGCATGAAACAAAGGCTTAGGGGCCAACAAAG  
 GCTTCCAGCTGGATGTGTGTGTAGCATGTACCTTATTATTTTTGTACTGACAGTTAACAGTGG  
 TGTGACATCCAGAGAGCAGCTGGGCTGCTCCCGCCCCAGCCCGGCCAGGGTGAAGGAAGAGGC  
 ACGTGCTCCTCAGAGCAGCCGAGGGAGGGGGAGGTTCGGAGGTTCGTGGAGGTGGTTTTGTGTAT  
 CTTACTGGTCTGAAGGGACCAAGTGTGTTTGTGTTTGTGTTTGTATCTTGTTTTTCTGATCGGA  
 GCATCACTACTGAC

**Mir-22**

**Mir-181a**

CTGTTGTAGGCAGCTATCTTACAGACGCATGAATGTAAGAGTAGGAAGGG  
 GTGGGTGTCAGGGATCACTTGGGATCTTTGACACTTGAAAAATTACACCTGGCAGCTGCGTTTA  
 AGCCTTCCCCATCGTGTACTGCAGAGTTGAGCTGGCAGGGGAGGGGCTGAGAGGGTGGGGGCT  
 GGAACCCCTCCCCGGAGGAGTGCCATCTGGGTCTTCCATCTAGAAGTGTTCATGAAGATAA  
 GATACTCACTGTTTCAATACACTTGTGTTCAAGTATTAAGACCTATGCAATATTTTTTACT  
 TTTCTAATAAACATGTTTGTAAAACAGTTGGTTGAGTCTCTCATCAGTACCATGAAGTAAAA

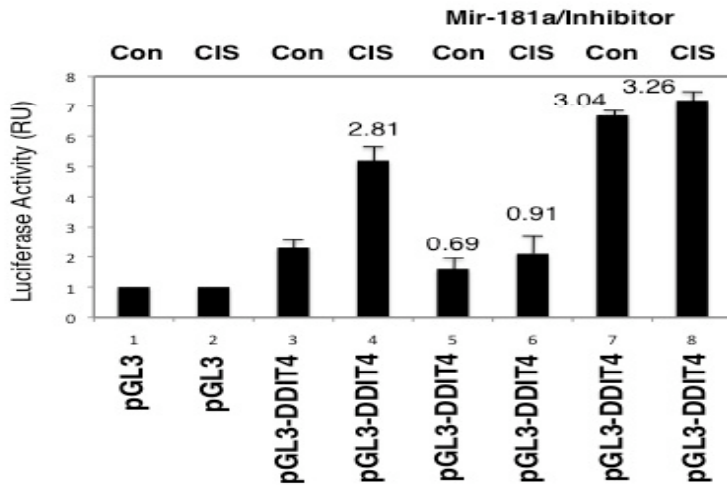

**Figure S11**

[YES1 3'- UTR (S211786) ]

TGCTTAGAAAAATTACAATATCATAGTTCACATAAAGCCCTTAAAAAATCTCATGTCACAAGTT  
 GTTGATAAGAGGAAATAATGACAGCACTCTTCTTAGGAAGACCCTCTTGGTAGAGAGTGTCAAT  
 ACTAAGCAGGTTACGTAAACAGAAAAACAACCACAATTTTTAGTACCAGAACCCTGCCAACT  
 TGCATGAAGTCCATCTTCACATTTTAAAAATGGTTTGAATTTGAACATATATGCCATGGCACAG  
 AATTTTGAATCTGATGATTAATACTCCCTGAAGAATGCACTTTGATAGTTAAGAATTATATC

**Mir-519a**

CTGAAAATAGAGGGGCCTAATATAAGGCTTAATTTAAAGTGTGACTATATGAGAGTATTTTAAA  
 ACATATACACCAGACCTTCATTTTTATTCATCAATTTTTCTTTGCTAGACACTCAAACCACTAA  
 TGCTGCTATTCAAATCTGTATTTTGAATTACTGAGTTACTCTTAAAAATTAGTCTTATTTTTGT  
 ATGTTTCACTTTTGCACCTTAGGGTAAAAACTGTCCCCTTTTACCACCGTTAATATTCAGAAT  
 AAGTTTTCCTCCCAAATCAACCATTTAATGTATTCTAAAAGGGAAAAAATGACCACCATTACA  
 TAGACTTTAGAAAGTGAATGTAGGCTGGGCGCGGTGGCTCACGCCTGTAATCCCAGCACTTTGGG  
 AGGCCGAGGCGGGCAGATCACAAGGTCAGGAGATCGAGACTATCCTGGCTAACACGGTGAAACT  
 GCGTCTCTACTAAAAATACAAAAAAGTAGCCAGGCGTGGTGGTGGGCACCTGTAGTCCCAGCTA  
 CTCGGGAGGCTGAGGCAGGAGAATGGTGTGAACCTGGGAGGCAGAGCTTGCAGTGAGCCGAGAT  
 CGCGCCACTGCACTCCAGCCTGGGCGACAGAGCGAGACTCCGTCTCAAAAAAGAAAACAAAAA  
 AAGTGAATGTAGATTCAAACATGATTTGAAAAGTGGAGTTCTAAAAATGTTTTACATAAAAAACC  
 ATATCCCCTGCAATGAATGTGAAGCCATAACTTCATTATTTTGAACAAATACCCATTTAGTGT  
 GTAAGAAAAAATTAGTTTTATAGTTATACTTTATAACTCTTCAAAGTCTCAGAATATAGCTAAGT  
 GAGGAGCTCTGAGTGCCAGCAAAGCCATTCTGTCACTCCATGACATCAACATTAAACATTACCT  
 TCCATCCCTCTAACTGTAAAAGTTCACCTTCTTTTCTCGTATTTCTTTTAAATACATTTTCC  
 TCTCTGTTTCACTATATTCACCATGAGCAAAAGTGCATTCAAGTCCCTGATCTGGTCATATTTT  
 CTATTTGTGGCACCCATCCCCATAAGGACATATAAGCAATACTCACAGTACGAAGTCTAGTTTT  
 TAAAAAGGGCTTTTTAAATGCTGGGTCTTACTTTGCATGCTATCTAAAGATCAAACATTTCCC  
 CTTTGATTGGACAGTAGTTTCAATTATATATTGCCTTAAAAAATCAATGCAACCTCATAACAAGA  
 TTAAGTCACTTTCTAGTTACCTTCATTATTCTAAGTCAAACCTTTCAGAAAAGGACTGAAGTGA  
 AAAAGTCTTATTCTTTTCAAGTCCATGAACATGAATATTAATGTACTGCATTATACTTTCAAAT  
 TCCACTTCTGTGGTCTAACATTTAATCAAGTTTGGAGATCCTGTTTATATTCCTTTTAAAAAACC  
 TGGCCCATGTCCATGCAAAAGAAAGCATATATTAAGATTGCATACTGACTGTTTAACTTAGAAA  
 AAAGTCTTGAAGAATAATAAATGCAAGAACTTTAAAAAAGTGAATGGAATTTATTTGGTCCCAT  
 GATATTCCTTAATTTTAGATTTTATTTATGGTATAGCTTTTTATCTCTCAAGTTTTATCTGTAA  
 AATAAATAATTTCTTTGAGCAATTCCTGACTTTGGGGAAAAAAGAAAGGAAATGATTTATAAA

TAAGCAGGAGCCTCACTGTCCTTCACTCTACATTGAATGCACCCTTGTTCATCAGTATCTTAGCTC

**Mir-18b**

TATTTTGTGGACCCTGAAATACGCTGATAAATTCATCATTTGGTACATTAGAGTTTAATACTT  
GGGGAAAAAAAAAGTGGTTTTGTGCAACCATATCTGGGATTCCAGTTTACCATTA AAAACATGCA  
GAGTAAAGAAGATTTTCTTCTTTTGATTCTGTAGAAAATCTACACAAGTTCTTTATATTTTGG

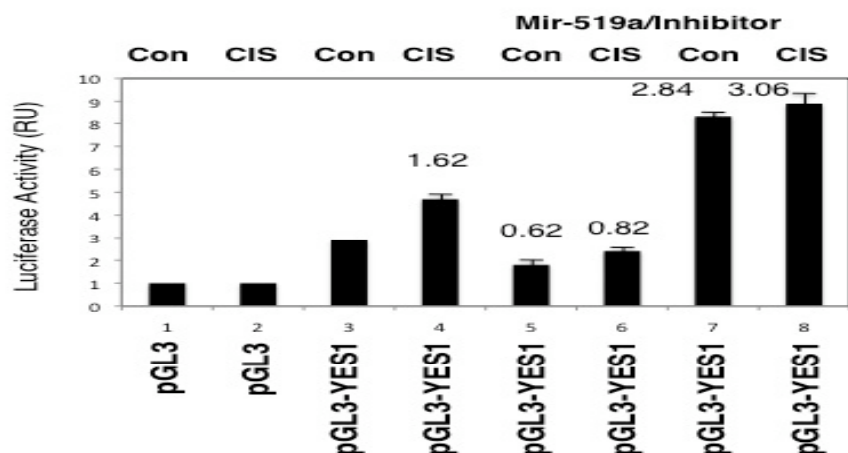

**Figure S12**

[HIPK2 3'-UTR (S202331)]

CAGTTTGGCGTACAACAGCCCTCCAGAATGTGGTTCTTGAGCTGGGTTTTTTTGTATTTG

**Mir-181a**

ACTTTTTTTTTTCTTTTTCTTTTTTAAAATAAAAACCATAGATTTCCACCCCTCTTT  
AATCCCTTCTTTTTAAAATGTTCTCTTCTCTGCTCTACGTCCTCCACTTCCCGGTTC  
AAGTTTCACTGGTGTCCCGACCCGTCCCCCTGCCCTCTGCCCCCCCCCCCCCCCCGCC  
CCTGCCCGTTTGCATTGTTTGTGTGCGGCATCTTCAGTATAAAAGGCCAGCGCCACG  
GTCCAGGAGCGCTCCCTCCTTCTCTCCCTCCTCCCTCGGGCCATTCTCTCCCTCCCT  
CCCTCCCTCCCTCCCTCCAGTGTATATGTAAGGGTACTGGTTGAATGTCCTTGGC

**Mir-181a**

ATM 3'-UTR (SC221017)

AGCCGACTTTTCCCAGGATGGAAAGCTTGGGTGTGATCTTCAGTATATGAATTACCCTTTCATT  
CAGCCTTTAGAAATTATATTTTAGCCTTTATTTTAACTGCCAACATACTTTAAGTAGGGATT  
AATATTTAAGTGAACATTTGTGGGTTTTTTTGAATGTTGGTTTTAATACTTGATTTAATCACCA

**Mir-181a**

CTCAAAAATGTTTTGATGGTCTTAAGGAACATCTCTGCTTTCACTCTTTAGAAATAATGGTCAT  
TCGGGCTGGGCGCAGCGGCTCACGCCTGTAATCCCAGCACTTTGGGAGGCCGAGGTGAGCGGAT  
CACAAGTTCAGGAGTTCGAGACCAGCCTGGCCAAGAGACCAGCCTGGCCAGTATGGTGAAACCC  
TGTCTCTACTAAAATAACAAAATTAGCCGAGCATGGTGGCGGGCACCTGTAATCCCAGCTACT  
CGAGAGGCTGAGGCAGGAGAATCTCTTGAACCTGGGAGGTGAAGGTTGCTGTGGGCCAAAATCA  
TGCCATTGCACTCCAGCCTGGGTGACAAGAGCGAACTCCATCTCAAAAAAAAAAAAAAAAAA  
CAGAAACGTATTTGGATTTTCTAGTAAGATCACTCAGTGTACTAAATAATGAAGTTGTTAT  
GGAGAACAAATTTCAAAGACACAGTTAGTGTAGTTACTATTTTTTTAAGTGTGTATTA AACTT  
CTCATTCTATTCTTTTATCTTTTAAAGCCCTTCTGTACTGTCCATGTATGTTATCTTTCTGTGA  
TAACTTCATAGATTGCCTTCTAGTTCATGAATCTCTTGTGATGATATAATCTTTTACC  
CTATCCATTGGGCTTCTTCTTTCAGAAATTGTTTTTCATTTCTAATTATGCATCATTTTTTCA

TCTCTGTTTCTTGATGTCATTTTTAATGTTTTTTAATGTTTTTTATGTCACATAATTTTTAA  
ATGTCTGTACTTGATAGACACTGTAATAGTTCTATTAATTTAGTTCCTGCTGTTTATATCTGT  
TGATTTTTGTATTTGATAGGCTGTTTCATCCAGTTTTGTCTTTTTGAAAAGTGAGTTTATTTTCA  
GCAAGGCTTTATCTATGGGAATCTTGAGTGTCTGTTTATGTCATATTCCCAGGGCTGTTGCTGC  
ACACAAGCCCATTCTTATTTAATTTCTTGGCTTTAGGGTTTCCATACCTGAAGTGTAGCATAA  
ATACTGATAGGAGATTTCCCAGGCCAAGGCAAACACACTTCCTCCTCATCTCCTTGTGCTAGTG  
GGCAGAATATTTGATTGATGCCTTTTTCTACTGAGAGTATAAGCTTCCATGTGTCCACCTTTAT  
GGCAGGGGTGGAAGGAGGTACATTTAATTTCCACTGCCTGCCTTTGGCAAGCCCTGGGTCTTT  
GCTCCCATATAGATGTCTAAGCTAAAAGCCGTGGGTAAATGAGACTGGCAAATTGTTCCAGGA  
CAGCTACAGCATCAGCTCACATATTCACCTCTCTGGTTTTTTCATTCCCCTCATTTTTTTTCTGAG  
ACAGAGTCTTGCTCTGTACCCAGGCTGGAGTGCAGTGGCATGATCTCAGCTCACTGAAACCTC  
TGCCTCCTGGGTTCAGCAATTCTCCTGCCTCAGCCTCCCGAGTAGCTGGGACTACAGGCGTGT  
GCCAACACGCCCGGCTAATTTTTTTGTATTTTTATTAGAGACGGAGTTTCACCGTGTAGCCAGG  
ATGGTCTCGATCGCTTGACCTCGTGATCCACCCTCCTCGGCCTCCCAAAGTGCTGGGATTACAG  
GTGTGAGCCACCGCGCCCGGCTCATTTCCCCTCATTTTTTGACCCTAAGGATTTCCCCTTTCTTG  
TAAGTTCTGCTATG

**Mir-181a**

TGGAAGGGGAAGGGCTTAGGTATCTAGTTTGATACATAGGTAGAAAGTGAACATTTCTCTGTCC  
CCCAGCTGTCATCATATAAGATAAACATCAGATAAAAAGCCACCTGAAAGTAAACTACTGACT  
CGTGTATTAGTGAGTATAATCTCTTCTCCATCCTTAGGAAAATGTTTCATCCCAGCTGCGGAGAT  
TAACAAATGGGTGATTGAGCTTTCTCCTCGTATTTGGACCTTGAAGGTTATATAAATTTTTTTC  
TTATGAAGAGTTGGCATTTCTTTTTATTGCCAATGGCAGGCACTCATTTCATATTTGATCTCCTC  
ACCTTCCCCTCCCCTAAAACCAATCTCCAGAACTTTTTGGACTATAAATTTCTTGGTTTTGACTT  
CTGGAGAACTGTTTCAGAATATTACTTTGCATTTCAAATTACAAACTTACCTTGGTGTATCTTTT  
TCTTACAAGCTGCCTAAATGAATATTTGGTATATAATTGGTAGTTTTTATTACTATAGTAAATCAA  
GGAAATGCAGTAAACTTAAAATGTCTTTAAGAAAGCCCTGAAATCTTCATGGGTGAAATTAGAA  
ATTATCAACTAGATAATAGTATAGATAAATGAATTTGTAGCTAATCTTGCTAGTTGTTGCATC  
CAGAGAGCTTTGAATAACATCATTAATCTACTCTTTAGCCTTGCATGGTATGCTATGAGGCTCC  
TGTTCTGTTCAAGTATTCTAATCAATGGCTTTGAAAAGTTTATCAAATTTACATACAGATCACA  
AGCCTAGGAGAAATAACTAATTCACAGATGACAGAATTAAGATTATAAAAGATTTTTTTTTTTGT  
AATTTTAGTAGAGACAGGGTTGCCATTGTATTCCAGCCTTGGCGACAGAGCAAGACTCTGCCTC  
AAAAAAAAAAAAAAAAAGGTTTTGGCAAGCTGGAACCTTTCTGCAAATGACTAAGATAGAAAA  
CTGCCAAGGACAAATGAGGAGTAGTTAGATTTTGAAAATATTAATCATAGAATAGTTGTTGTAT  
GCTAAGTCACTGACCCATATTATGTACAGCATTTCTGATCTTTACTTTGCAAGATTAGTGATAC  
TATCCAATACACTGCTGGAGAAATCAGAAATTTGGAGAAATAAGTTGTCCAAGGCAAGAAGATA  
GTAAATTATAAGTACAAGTGAATATGGACAGTATCTAACTTGAAAAGATTTTCAGGCGAAAAGA  
ATCTGGGGTTTGCCAGTCAGTTGCTCAAAGGTCAATGAAAACCAAATAGTGAAGCTATCAGAG  
AAGCTAATAAATTATAGACTGCTTGAACAGTTGTGTCCAGATTAAGGGAGATAATAGCTTTCCC  
ACCCTACTTTGTGCAGGTCATACCTCCCCAAAGTGTTTACCTAATCAGTAGGTTCCAAACTCT  
TGGTCATTATAGTATATGCCTAAAATGTATGCACTTAGGAATGCTAAAAATTTAAATATGGTCT  
AAAGCAAATAAAAGCAAAGAGGAAAACTTTGGACAGCGTAAAGACTAGAATAGTCTTTTAAAA  
AGAAAGCCAGTATATTGGTTTGAATATAGAGATGTGTCCCAATTTCAA

**Mir-18b**

CTTAATGAAATTATCTATTTTCTATAGATTTT

**Mir-181a**

TGAATTTATTATAAAGTG

**Mir-374a**

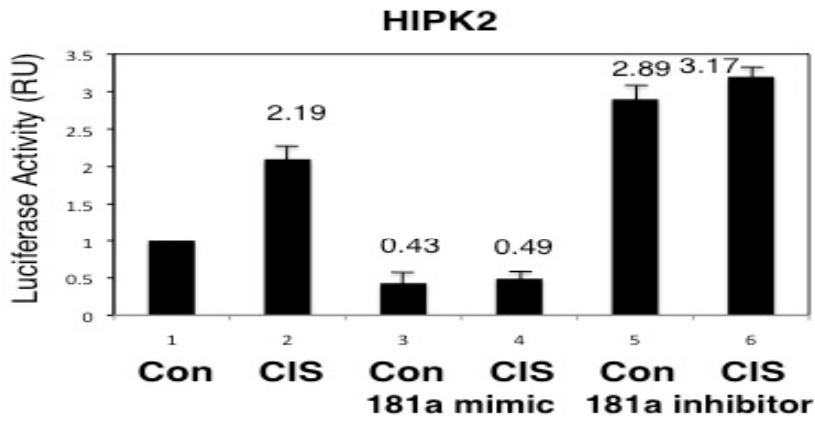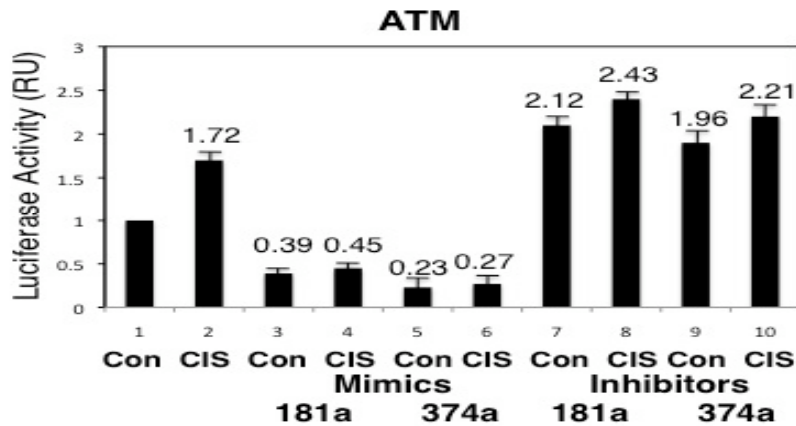

**Figure S13**

[HMGA1 3'-UTR (S209018)]

CCTCGGAGGAGGAGCAGTGACCCATGCGTGCCGCTGCTCCTCACTGGAGGAGCAGCTTCCTTCTGG  
 GACTGGACAGCTTTGCTCCGCTCCCACCGCCCCACCCCTTCCCAGGCCACCATCACCACCGCCT  
 CTGGCCGCCACCCCATCTTCCACCTGTGCCCTCACCACCACACTACACAGCACACCAGCCGCTGCA  
 GGGCTCCCATGGGCTGAGTGGGAGCAGTTTTCCCTGGCCTCAGTCCCAGCTCCCCCGCCACC  
 CACGCATACACATGCCCTCCTGGACAAGGCTAACATCCCCTTAGCCGCACCCTGCACCTGCTGC  
 GTCCCCACTCCCTTGGTGGTGGGGACATTGCTCTCTGGGCTTTTGGTTTGGGGGCGCCCTCTCTGCT  
 CCTCACTGTTCCCTCTGGCTTCCCATAGTGGGGCCTGGGAGGGTTCCCCTGGCCTTAAAAGGGGCC  
 CAAGCCCCATCTCATCCTGGCAGCCCTACTCCACTGCCCTGGCAGCAGCAGGTGTGGCCAATGGAG  
 GGGGGTGCTGGCCCCAGGATTCCCCAGCAAACCTGTCTTTGTCACCACGTGGGGCTCACTTTTCA

**Mir-29c**

TCCTTCCCCAACTTCCCTAGTCCCCGTA TAGGTTGGACAGCCCCCTTCGGTTACAGGAAGGCAGGA  
 GGGGTGAGTCCCCTACTCCCTCTTCACTGTGGCCACAGCCCCCTTGCCCTCCGCTGGGATCTGAGT  
 ACATATTGTGGTGTATGGAGATGCAGTCACTTATTGTCCAGGTGAGGCCAAGAGCCCTGTGGCCGCC  
 ACCTGAGGTGGGCTGGGGCTGCTCCCCTAACCTACTTTGCTTCCGCCACTCAGCCATTTCCCCCTC  
 CTCAGATGGGGCACCAATAACAAGGAGCTCACCTGCCCGCTCCCAACCCCCCTCCTGCTCCTCCCT  
 GCCCCCAAGGTTCTGGTTCCATTTTTCTCTCTGTTCACAAACTACCTCTGGACAGTTGTGTTGTTTT

**Mir-98**

TTGTTCAATGTTCCATTCTTCGACATCCGTCAATTGCTGCTGCTACCAGCGCCAAATGTTTCATCCTCA  
 TTGCCCTCCTGTTCTGCCACGATCCCCTCCCCAAGATACTCTTTGTGGGGAAGAGGGGCTGGGGCA  
 TGGCAGGCTGGGTGACCGACTACCCAGTCCCAGGGAAGGTGGGGCCCTGCCCTAGGATGCTGCAG

CAGAGTGAGCAAGGGGGCCCAAATCGACCATAAAGGGTGTAGGGGCCACCTCCTCCCCCTGTTCTGT  
 TGGGGAGGGGTAGCCATGATTTGTCCCAGCCTGGGGCTCCCTCTCTGGTTTCCATTTTGCAGTTACT  
 TGAATAAAAAAATATCCTTTTCTGGACTGGAGTCTCCTGTGGTGTGTGCCCTAAAG

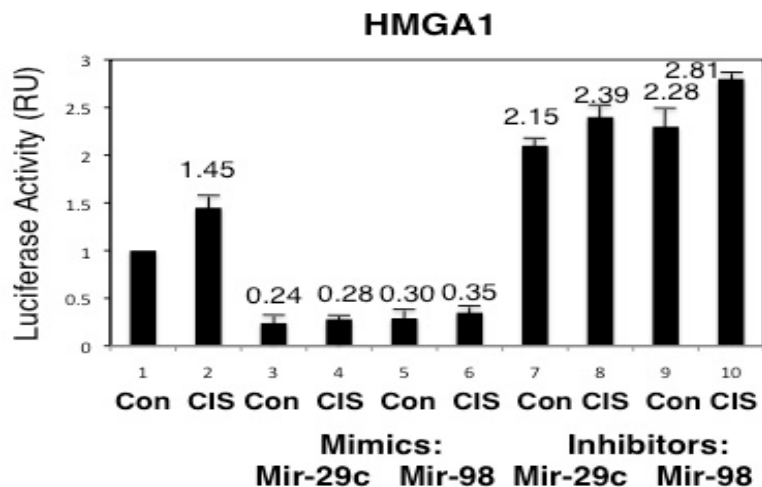

**Figure S14**

[ BCL2 3'-UTR (SC222289) ]

TGGTGGGAGGAAAAGAGTTGGGAAC TTCAGATGGACCTAGTACCCACTGAGATTTCCACGCCGA  
 AGGACAGCGATGGGAAAATGCCCTTAAATCATAGGAAAGTATTTTTTTAAGCTACCAATTGTG  
 CCGAGAAAAGCATT TTAGCAATTTATAACAATATCATCCAGTACCTTAAGCCCTGATTGTGTATA  
 TTCATATATTTTGGATACGCACCCCCCACTCCAATACTGGCTCTGTCTGAGTAAGAAACAGA  
 ATCCTCTGGAAC TTGAGGAAGTGAACATTTCCGGTGACTTCCGCATCAGGAAG CTAGAGTTACC

**Mir-760**

CAGAGCATCAGGCCGCCACAAGTGCCTGCTTTTAGGAGACCGAAGTCCGCAGAACCTGCCTGTG  
 TCCCAGCTTGGAGCCTGGTCTTGGAACTGAGCCGGGGCCCTCACTGGCCTCCTCCAGGGATGA  
 TCAACAGGGCAGTGTGGTCTCCGAATGTCTGGAAGCTGATGGAGCTCAGAATTTCACTGTCAAG  
 AAAGAGCAGTAGAGGGGTGTGGCTGGGCCTGTCACCCTGGGGCCCTCCAGGTAGGCCCGTTTTTC  
 ACGTGGAGCATGGGAGCCACGACCCTTCTTAAGACATGTATCACTGTAGAGGGAAGGAACAGAG  
 GCCCTGGGCCCTTCTATCAGAAGGACATGGTGAAGGCTGGGAACGTGAGGAGAGGCAATGGCC  
 ACGGCCATTTTGGCTGTAGCACATGGCACGTTGGCTGTGTGGCCTTGGCCCACCTGTGAGTTT  
 AAAGCAAGGCTTTAAATGACTTTGGAGAGGGTCACAAATCCTAAAAGAAGCATTGAAGTGAGGT  
 GTCATGGATTAATTGACCCCTGTCTATGGAATTACATGTAAAACATTATCTTGTCACTGTAGTT  
 TGGTTTTATTTGAAAACCTGACAAAAAAAAGTTCCAGGTGTGGAATATGGGGTTATCTGTAC  
 ATCCTGGGGCATTAAAAAAAATCAATGGTGGGGAACTATAAAGAAGTAACAAAAGAAGTGAC  
 ATCTTCAGCAAATAAACTAGGAAATTTTTTTTTCTTCCAGTTTAGAATCAGCCTTGAACATTG  
 ATGGAATAACTCTGTGGCATTATTGCATTATATAACCATTTATCTGTATTAAC TTTGGAATGTAC  
 TCTGTTCAATGTTTAATGCTGTGGTTGATATTTGAAAGCTGCTTTAAAAAATAACATGCATCT  
 CAGCGTTTTTTTGT TTTTAAATTGTATTTAGTTATGGCCTATACACTATTTGTGAGCAAAGGTGA  
 TCGTTTTCTGTTTGAAGTTTTTATCTTGTATTCTTCAAAGCATTCTGAGAAGGTGAGATAAG  
 CCCTGAGTCTCAGCTACCTAAGAAAAACCTGGATGTC ACTGGCCACTGAGGAGCTTTGTTTCAA  
 CCAAGTCATGTGCATTTCCACGTCAACAGAATTGTTTATTGTGACAGTTATATCTGTTGTCCCT  
 TTGACCTTGT TTTCTTGAAGGTTTCTCGTCCCTGGGCAATTCCGCATTTAATTCATGGTATTCA  
 GGATTACATGCATGTTTGGTTAAACCCATGAGATTCATTCAGTTAAAAATCCAGATGGCAAATG  
 ACCAGCAGATTCAAATCTATGGTGGTTTGAAC TTTAGAGAGTTGCTTTACGTGGCCTGTTTCAA  
 CACAGACCCACCCAGAGCCCTCCTGCCCTCCTTCCGCGGGGGCTTTCTCATGGCTGTCTTCAG  
 GGTCTTCCCTGAAATGCAGTGGTGCTTACGCTCCACCAAGAAAGCAGGAAACCTGTGGTATGAAG



CCAGACCTCCCCGGCGGGCCTCAGGGAACAGAATGATCAGACCTTTGAATGATTCTAATTTTTTA  
 AGCAAATATTATTTTATGAAAGGTTTACATTGTCAAAGTGATGAATATGGAATATCCAATCCT  
 GTGCTGCTATCCTGCCAAAATCATTTTAATGGAGTCAGTTTGCAGTATGCTCCACGTGGTAAGA  
 TCCTCCAAGCTGCTTTAGAAGTAACAATGAAGAACGTGGACGTTTTTAAATATAAAGCCTGTTTT  
 GTCTTTTGTGTTGTTGTTCAAACGGGATTCACAGAGTATTTGAAAAATGTATATATATTAAGAGGT  
 CACGGGGGCTAATTGCTGGCTGGCTGCCTTTTGTGCTGTGGGGTTTTTGTACCTGGTTTTAATAAC  
 AGTAAATGTGCCAGCCTCTTGGCCCCAGAAGTGTACAGTATTGTGGCTGCACTTGTCTAAGA  
 GTAGTTGATGTTGCATTTTCTTATTGTTAAAAACATGTTAGAAGCAATGAATGTATATAAAG  
 CCTCAACTAGTCATTTTTTTCTCCTCTTCTTTTTTTTTTTCATTATATCTAATTATTTTGCAGTTGG  
 GCAACAGAGAACCATCCCTATTTTGTATTGAAGAGGGATTCACATCTGCATCTTAACTGCTCTT  
 TATGAATGAAAAACAGTCTCTGTATGTACTCCTCTTTTACACTGGCCAGGGTCAGAGTTAAAT  
 AGAGTATATGCACTTTCCAAATTGGGGACAAGGGCTCTAAAAAAGCCCCAAAAGGAGAAGAAC  
 ATCTGAGAACCTCCTCGGCCCTCCCAGTCCCTCGCTGCACAAATACTCCGCAAGAGAGGCCAGA  
 ATGACAGCTGACAGGGTCTATGGCCATCGGGTCTGCTCCTCGAAGATTTGGCAGGGGCAGAAAAC  
 CTGGCAGGCTTAAGATTTGGAATAAAGTACAGAATTAAGGAAGCACCTCAATTTAGTTCAAAC  
 AAGACGCCAACATTCTCTCCACAGCTCACTTACCTCTCTGTGTTTCAGATGTGGCCTTCCATTTA

**Mir-630**

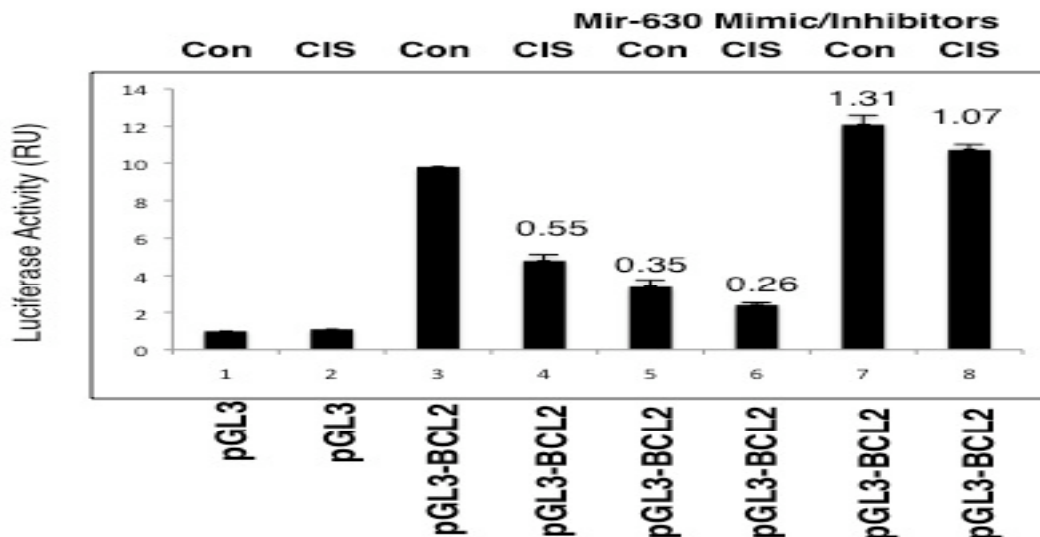

**Figure S15**

BCL2L2 3'-UTR (S213742)

TACATAAGCAGCTGTATTCCATTAGATGAGTGGGATTTAGGGAACGCAGAAGGCACATCCCTTT  
 GGAATGGAAGCTTAGGGGTTCTCAGGTGATAGGGAGAGGTGGCTGTTAACAGTGGGCTGCTTGG  
 ACACGCGTGTGCATGTGCACGCATGCTGGTGTGCATGCTGGGCTGCCTGGCAAATCTGGTGGTG  
 ATGGGATTCCTCAAGGAGAAAACATTCCTCTTGCATGGCAAGAACTAGGGGCAGTTCTCTGT  
 CCCTCCTCCCAACCCCTCCTTTCCCCTGCCCTTGTCTGATGCCTCAAGGCTTAGAGAGAAACA  
 TTGTATCCAGACCGAGGGCTCTGCTGCTTCTTTCCAGAAAGTGATTGGCAAGGCTTTGGAGAGA  
 AGAGCAGTTCTGCAGCTGGCCTTGTTCCTTCATCATCCCCCTTCTTGTGCATTATGCACTTGC  
 TGCTGCCTCCTGGGCTCTGATAGAAGGGCAGGGCTGTTGAGCCTGGATGGGTGGAGGCTTAGGT  
 AGCCGGACCTGCCTGCCACCCCTCCTCTCCCACCTCAGGCACAATGGTGCCTAAAGTGTTCCTCAAT  
 CTCTGGGACCTCTGTACCCAAACTGAAACTCTAAATTTGGGGCCCTAACTAATTTTCTTTTGGAG  
 GTTGTGGGCATAAGTGCTGATCTAGAATACAGTCTGGGTCCCACACTGTGTCTCAGTGAGACTG

**Mir-630**

TTGATGCCTTGAGATGACCATTTTCAGATCTGAATCCCATGGGTGTGAGGGTGATGGGTACTCCA

GGACTGGCCTATGCTGTGTTGTGGGCTTTGGTTTCGGCTTTATCAGGGGCCAGGCATATGGGTTCTAGAGTACCTACCATGACCTAGAAGCATTATGATTTATTTGAAGCCACACTGTTTGCATGGGTGTTACTTGTCTGTACCTCAGAGTCTGAGGATGTTAACTTTGGAACTCGCAGTCCTCTAGAACAGCTTCAGATTATGGCTTTTTCTTTTGGAGGAAGAAATTATCACTCCAGATGCATGCCCTGAGCCAGACCTCACTGCTGCACTTTCCAAGGTGCTAAGATTGCTGCTCTCCAATGCTAACTTTCTGACACAGTGTCTCTAGAACCCTGCCTGTGGTCCTGAGCACTGATCACCTTAGCTAGACCATGGTTGACTCTTCTTGGAGATTTTCACTTGGTCCTAGAATGTGGCAACGTAGTTGTGCTCGCCAGAACGTGGGACCAAATTGGCCTCAGGTGTTGAGTCCAGACTTCTGCTTTTTGAGAGAGGGCTGCACTTTTTTCATGTATTTCTAGGGGAGGTGGTAGGCTGCATGTGCCACTTGGTCTTGTGTGAGTATGCTGACACCAGAAACTCAGAGCCGCTTGTGGCAAGCAGTTGGGGTGGGGGGTCTCTGACTTGCTCAGGACAA

**Mir-760**

ACTAGGCCAGTGGTTTTCAAAGTCTTGGCAGAGCCCTGAAGTTTCTTAGGGGTTGCCTCAGGAGTCCCTGGGGAGATGAAGGGGGTGGGGAGCTGAGCAGGCTGGGCAATTTGCCCTCAAACAGAACAGCTCCCCTTGTAGCTGTCTTACATATTGGGGTTCAGGGTAAGATTTTATTTGCATTAAGGGGTGTGCTGCTGAAAAAAGTTGGAAAACCACTGACTAGACCATCGGCTCCAAATTGGAGTCTGTGCTTCCCTCCCCAGGTATGGAGCACACTTTCACCCTACCCTCTACCACAGGACACATATCCCTGTAGCATTTCCCGGGACCTTTAGCCAAGAGGAGCTGCAGGGACCATGGCCAGTTACCAAATGCCTGCTCTGAAGCCTTGACACCTGGGTGGAAAGAGAGGCTGTTTTCTGAAAGGGTAAAGGGCTTGGTCTGGATTCCCAGAAGCATAGCTTAGATGGGACCACAGTGGGCAATTTTGACCTGTCTGCCCTTCTTAGCTTGAAGGGAAACCCAGAGACTCTTCTGTGAGGGAAACTAGGGACTCTCTTCTAGAGCCATATAGTTCCCTGGGATTAGCTCTTGGCCAAGAAGGCTGAGTATGGTTCCAATTTTAATCCATTTTCAATTTTAAAAATAAGGGAAATAAATGTAATTGCCATTTTCAAAGATTAAGTAGGAGGAGAGGGGTTTCTTGCTCTCCAGAGCCCAAAGGGACAAATAGGGACTTTGTTTAGGCCA

**Mir-760**

AGGAAGGAGCGGAAGTAGGGCAACTCGGTCTGCGATTATTAATCCCCTCCCACTTATTCTAGGGCACACAAACACTATTTTACTTTTTTAAATCATAAAACGGCAGAACAGATTTGTTAGTTT

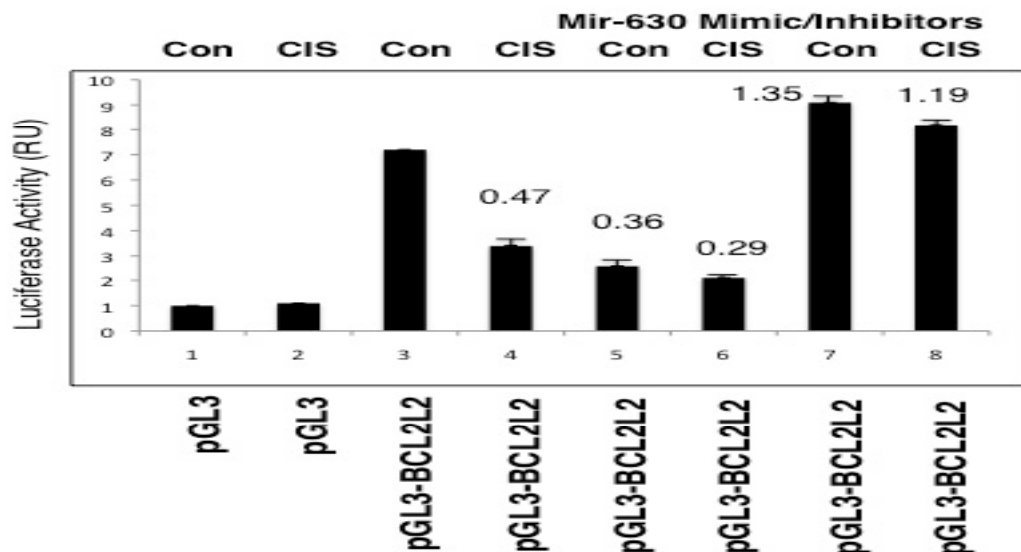

**Figure S16**

YAP1 3'-UTR (SC220924)

TGGCTGCCACCAAGCTAGATAAAGAAAGCTTTCTTACATGGTTATAGAGCCCTCAGGCAGACTGAATTCTAAATCTGTGAAGGATCTAAGGAGACACATGCACCGGAAATTTCCATAAGCCAGTTGCA GTTTTCAGGCTAATACAGAAAAAGATGAACAAACGTCCAGCAAGATACTTTAATCCTCTATTTT GCTCTTCCCTTGTCCATTGCTGCTGTTAATGTATTGCTGACCTCTTTCACAGTTGGCTCTAAAGA

ATCAAAGAAAAAACTTTTTATTTCTTTTGCTATTAAACTACTGTTTCATTTTGGGGCTGGG  
 GGAAGTGAGCCTGTTTGGATGATGGATGCCATTCTTTTGCCAGTTAAATGTTCCACCAATCAT  
 TTTAACTAAATACTCAGACTTAGAAGTCAGATGCTTCATGTCACAGCATTAGTTTGTTCACA  
 GTTGTTCCTCAGCTTCCTTTGTCCAGTGGAAAAACATGATTTACTGGTCTGACAAGCCAAAA  
 TGTTATATCTGATATTAAATACTTAATGCTGATTTGAAGAGATAGCTGAAACCAAGGCTGAAGA  
 CTGTTTTACTTTCAGTATTTTCTTTTCCCTCCTAGTGCTATCATTAGTTCACATAATGACCTT  
 GATTTTATTTTAGGAGCTTATAAGGCATGAGACAATTTCCATATAAATATATTAATTATTGCC  
 ACATACTCTAATATAGATTTTGGTGGATAATTTTGTGGGTGTGCATTTTGTCTGTTTTGTTGG  
 GTTTTGTGTTTTTTGTTTTTGGCAGGGTCGGTGGGGGGTGGTTGGTTGGTTGGTTTGTGCG  
 AACCTAGGCAATGACCATATTAGTGAATCTGTTAATAGTTGTAGCTTGGGATGGTTATTGTAG  
 GTTTTGGTAAATCTTCATTTCCCTGGTTTTTTTTTACCACCTTATTTAAATCTCGATTATCTG  
 CTCTCTTTTATATACATACA

**Mir-297**

TCCTTTTTTAGGTTTCCCTGCTTTCCAGTTAATTTTTAAATGGTAGCGCTTTGTATGCATTTA

**Mir-630**

GAATACATGACTAGTAGTTTATATTTCACTGGTAGTTTAAATCTGGTTGGGGCAGTCTGCAGAT  
 GTTTGAAGTAGTTTAGTGTCTAGAAAGAGCTATTACTGTGGATAGTGCCTAGGGGAGTGCTCC  
 ACGCCCTCTGGCATAACGGTAGATATTTATCTGATGAATTGGAAAGGAGCAAACCAGAAATGGCT  
 TTATTTCTCCCTTGGACTAATTTTAAAGTCTCGATTGGAATTCAGTGAGTAGGTTTATAATGT  
 GCATGACAGAAATAAGCTTTATAGTGGTTTACCTTCATTTAGCTTTGGAAGTTTTCTTTGCCTT  
 AGTTTTGGAAGTAAATCTAGTTTGTAGTTCTCATTTGTAATGAACACATTAACGACTAGATTA  
 AAATATTGCCTTCAAGATTGTTCTTACTTACAAGACTTGCTCCTACTTCTATGCTGAAAATTGA  
 CCCTGGATAGAATACTATAAGTTTTGAGTTAGCTGGAAAAGTGATCAGATTAATAAATGTATA  
 TTGGTAGTTGAATTTAGCAAAGAAATAGAGATAATCATGATTATACCTTTATTTTTACAGGAAG  
 AGATGATGTAAGTATGTGTCTACAGGAGTAATAATGTTTTCAAAGAGTATTTTTTAA  
 GGAACAAAACGAGCATGAATTAACTTTCAATATAAGCTATGAAGTAATAGTTGGTTGTGAATT

**Mir-630 Mimic/Inhibitors**

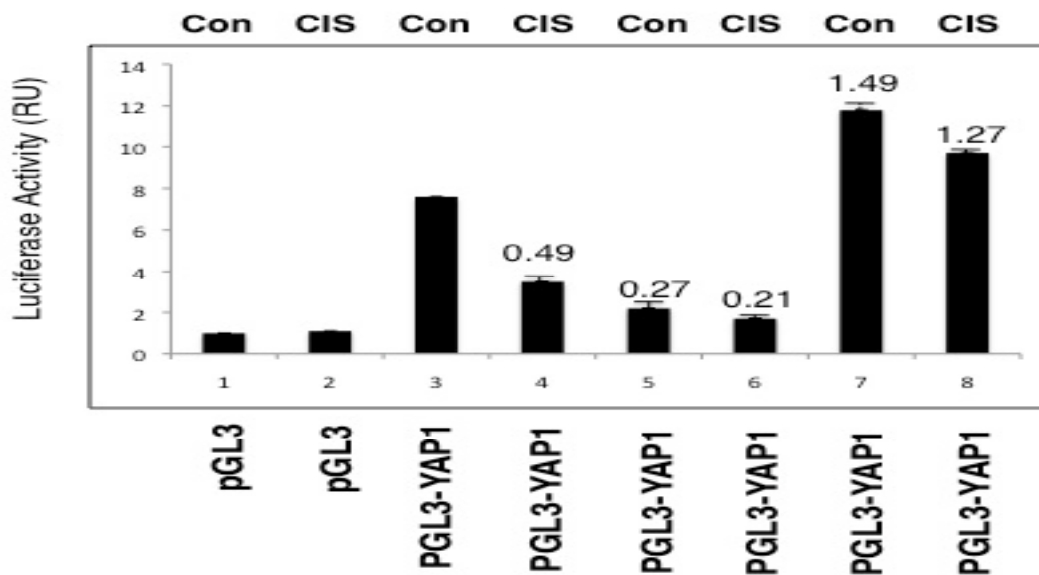

Supplement: cdd2010188x4.pdf [file cdd2010188x4.pdf]
