# Supplementary material
Source: PubMed Central journal article supplement (PMC3131951)
Supplement: cdd2010188x1.pdf [file cdd2010188x1.pdf]

**Figure S1**

DICER1 promoter sequence:

-2700 CTTATCTCC TTTGC **CATGA GCAAGTGGAA ACGTGACCAT G**ACATGGTAG  
**P53RE**

-2650 GGTCGCAAGT GAGAGACTGT CTACGAAATA TCTACTTTCT CAAATGAAAC  
-2600 AAGCACCTCA CATGTCAGAT AGTGGTAGAG AATAAACAT CCCAACGCCA  
-2550 TAAAAGTCAC CCTCTCTAGA AGATAGCACT ACAAGTACTG GACAACCCAC  
-2500 TATATGACAA AATCACTGTC AAATAAGAAT CATGAGCCAC ATCAAAAAGAC  
-2450 AATGTCTTCT AAAACCAAGA CAATAAAGCT CAATAATAGC AAAACAACCT  
-2400 AGTACCCAA CTCACACATT GAGCCACGGG CAAAATACAG CAGAGCAGTC  
-2350 AGGGCTTACC CTTCAAACAT GAGATGGAAG CATAAAAAGT AAAGCAGGCC  
-2300 CTTACTAAAA AGGATTGTAG GAAAATGT **CT TTTCTCCC**CA AATTAAATG  
**E2F**

-2250 GACTAACTGT TCTCTTCTTA AAACAGCATT TTGGTGCCGT GAGTAAATCT  
-2200 ATAAACCTAT GTTACCATGA TCAATGTTTA TAGTGACCAT GTTAAAAGCA  
-2150 ATCTTTAGTT TTTTGTTTTT TTATCTATTG AGTTTT **ATGG AATATGCC**CT  
**C/EBP $\beta$**

-2100 AAAATG **AAGT TTTGAAATAA** TTGTGTATGT ATGTGCATGT ACACAGCACA  
**C/EBP $\beta$**

-2050 TATTACATAT AATACACACG TGCCACAGGT AGCTTTAAAG TAGACTTTGC  
-2000 AAAATAAACT GGCTATTCCA GAACCTAATT TCCAAAGATA TCAATAATAT  
-1950 TGAAAATTAC TATTCTCTAG GACCTGGCTT ATCCCGAACC CATCTTTTAA  
-1900 TAAACTGAGT TTTTGGTGA GGATGTATAT TTTTATTTAG AAAACTTAAC  
-1850 GTTTACA **CCA AT**ACATATT **C AAGATAGCTA ACCTG**TTTAA ACAGCACATT  
**NF-Y P63RE**

-1800 TTTAACAATA TTTTCCGAGT TGCTTAAATC CTAACCTGAG TCCTTTTCCA  
-1750 CTGTTTGAAA ACAAGCACCA CGAAGACACC TGACAATCAG GATTGTAAAG  
-1700 ATTCAGAATA TTCGAAGACA GAAGCATAGG CGTCCAAGTG ATCCTCTTTC  
-1650 AT **CAAGTGAA TGTTTTTAA ACCTG**AAAGT CCTAAGAACA CTTACTTATC  
**P63RE**

-1600 GTGTAGACAA GTAACGTGTC CCTTTAACCA CAACTCTCTC CACAAAAGCA

-1550 CGGAGTTAAC ACTACACAAA TAGGACCCTC CAACTCATCT **CATGTTTC**  
-1500 **GCGGATCTTC AGG**TTCTTAA GGACACACTC AGTGGTTTG **C TGGCTCTGAC**  
**P53RE P63RE**

-1450 **CTCCAGG**CAG AGCCATCAGG GCAACTCAG CTTTTCTGGAC AATCTACAGA  
-1400 AATC **TGATGT GCTAAC**TTAA AACATACACT GATTTCCCCA AAATCAAAAA  
**STAT**

-1350 **CCTGAAGAA AGGGTCTCC GCAGG**GTCTA GGCATTTTGG CACAAAAACA  
**P63RE**

-1300 TCTGAGGGGA GAGGCAAAAG AATGGCCTCG GCC **CCTGCC GCCCCCAGG**  
**P63RE**

-1250 GCC **CCAAT****C** **CT GGTCCCCTGC AAG**TAATCAC ACAGGACCCT CCCGGGAGG  
**NF-Y P63RE**

-1200 ACCGAGAGCC CAGCTTCGTC CCCTCCGGGC GCGGCACAGC GGCCCCATCA  
-1150 GAGGAGGGCC **CATGGTGCT CCGGCAGGTC AGG**CGCGGT CTCCACCTCC  
**P53RE**

-1100 GCTGCTCCCG CGCCACCTTA GCGCGGTGA CGGGA **CCTGT CAAGAGCCCC**  
**P63RE**

-1050 **AGG**CCTC **GCC AGCCGGGGA GTGGACATG**C GCCGGCATCC CCCACCACGC  
**p300/P53RE**

-1000 CACGGCGGCC CGGAAAGTCT CCCAGGGCTG CCTCGCGGGG AGGCGCCGGG  
-950 GTCCGGGCCC AGGAGCAGAG CCGAGGCGGG CAGACGCCGG GTCCACAGGC  
-900 CGCGCTGGGC GGGACGACGA GGCAGGCGAG GCCGCGCCCT TCGTCAGCGC  
-850 CCGC **CAGGCC CGGACGCGCG GCTGG**CGGCC ATGGCCGGCA CGCGGCCTC  
**P63RE**

-800 CGCGCGGAGG CGGGAGCGCG GCCAGGCGAC CCGTGCCCCG CCCCAGCAC  
-750 AAAGCTGCTC CGCGGGAGCC CGCCTCACCT GCAGCACGGG GCGCCGCGGG

-700 CCTTCGAGAA CCATCGGACC CCGCTCCGGC GCGCGCGTGA CAGCCCAGGC

-650 C **TCCCGGAG**C CGCCCGGCGC CGCCGCCCCC GCCG **CCAAT**T CCTCGCGCTC  
**STAT** **NF-Y**

-600 GCCGTCGCCT CGTCCCCGCT GT **CAGGTTAC TCCATTACCC TGG**GCCTGCA  
**P63RE**

-550 GCAGCCTGCG CCGCGCCTCC GCCTCGACCC CTCCCGCCGG CGCCTGCGGA

-500 GACTGCGCAG CGCCCGGCTG GCCGGCAGCC AGCGCACGGC CCGCGGCAAC

-450 GGC GCA **CAGC CGCTTGGAGA A**TCCCACTGG CTCCCGCACC GCCCCTCCGC  
**p300**

-400 GCCCCACGC TCCGCTCGCC CCGTGGCGGC ATGAGAGCGA G **CCTGTGATT**  
**P63RE**

-350 **GGACAGG**GCC TGGCGGTGAA AGGTTAATCC CGGCCCCCA GCCACTCAGG

-300 AGCAGGGAGA CAGCGGGCGC GCGCGCGGAG GCCGGA **CAGG CGTTTGGGG**  
**P63RE**

-250 **CCAGCGCCTG** GACTGGACCT TGGCGTTGGG CCGCAGTTGC CCGGAGT **TTT**

-200 **TGGGGC**CCCC GGAACCCGC GCGCCGAGGC CGGCTAAGTT TGGCAGACTC  
**E2F**

-150 TCTGAGCTCT CGGAATTCGA CTGCCTCCAT TGTTGCTCCT TCTGGCACCC

-100 ACAGACCGTA ACGTGGCCGT AATTGTTTCC CGGAGAGCTT AGCTTCCCTC

-50 TGAGCACCTC CCTCCCCTTT TTAAAGTACC TTCCCACTCG **CCTGCGTTTC**  
**P63RE**

+1 **CTCG**CGTTAG TGGTGCAGGG GCCTCCGCAT TTGGGGAAAT AACAAACACC

Specific region primers:

CCAAT element #1, sense primer, (-1892) 5'-GTTTTTTGGTGAGGATGTAT-3'(1873), antisense primer, (1210) 5'-CCCGGGAGGGACCGAGAGCC-3'(-1191); CCAAT element #2, sense primer, (-1421) 5'-CTTTTCTGGACAATCTACA-3' (1402), antisense primer, (740) 5'-CGCGGGAGCCCGCCTCACC-3' (-721) yielding the 700 bp PCR fragment.

Non-specific region primers:

Sense primer, (-2639) 5'-AGAGACTGTCTACGAAATA-3'(2620), antisense primer, (2320) 5'-CATAAAAAGTAAAGCAGGCC -3'(-2301) yielding the 339 bp PCR fragment.
