# Supplementary material
Source: PubMed Central journal article supplement (PMC3131951)
Supplement: cdd2010188x2.pdf [file cdd2010188x2.pdf]

**Figure S2**

Mir-181a promoter sequence:

-2000 CTCGAAATAA TTTAGAATAT AGAGCCTAAA GTTTACTATC TTCTCTGACA  
-1950 TTAGATTAAT TGGAAGCAAG AACACAGAGA TCCTATTTTC CATTGTGGAG  
-1900 GATTTAAACT GTTAAGATAT GAGGTTTTAT CTTTAACAAA CTATGACTAT  
-1850 GATTAGCCCA AGGAAAGAAA AAATAATTAA TCACTTTATT TATCATTGCT  
-1800 ATTTTATGTG TAAATAACAA GACATTTAAT GTAA **CTTGTA TTGTTTCAAG**  
**P63RE**  
-1750 TGAATCATT TAAGATTTTT AAGAATTTTA ATGTTAA **ATC AATTATA**GTT  
**Oct-1**  
-1700 AAGATTTTTA TTCTAAGAAT GTAACAACTT TAGGATTAAG TTAATTGTAT  
-1650 TCTTCCAAAG ACTTCTAGGA GAATATTTTG GAAAACAAAA GATAACATAG  
-1600 TTATGCCT **TT TAATTATTTG** TAACTG **ACCT AGAG**CTTTGC TTA CTGTTAG  
**Oct-1 AP-1**  
-1550 GCCAAATGCA TTTTGTGTTA AGGGAAAATA CAGAGCATGG AGTCTTTTAT  
-1500 CACAACATCC CTATTATACA AACGTTAG **CA GATGTAGCAA GAG**ATGAATA  
**C/EBPβ**  
-1450 GG **CATGATTG AAAACATG**TG TATATTGA **CC TGACACTAAT ACCACAAG**AG  
**P53RE P63RE**  
-1400 GCAGGCAACA GAA **CAGGAGT GATATGCTTG** CAGTCGTAAT TGATAATGCA  
**P63RE**  
-1350 AACAAATGAA TCCTCAGTCT CATGATAATA TTCTTTCCAG CAGCAACACA  
-1300 GAAATGCCTA CTGATAAAGC ATTCTTCTAG GGTTTTATTTC TGTGGGAGAA  
-1250 ATTTGCTTCT TTCAAAAGAA T **TAAACAATG C**AAAATTCAG ATACATCACT  
**Sox-5**  
-1200 GTTTCATATT CTGTGCCTAT TTGTCACTTT AAAATTTACT TCCAGTTGAT  
-1150 CTCTAGTCCC TGTTTCTCTC AAAAAAATC TGTTGAAGTT TTCATGTAAA  
-1100 TAGTTTGTCT AAAAGGT **TAA ACAATTA**TTG GCTTTAAAAT AATTCTAAGT  
**Sox-5**  
-1050 GACTGAAATG TAAGAATGTG TAAAAATTTG GGATACATAT TTCACTAACA  
-1000 TTTTCGAGAGT AATTGCCTTG ACTTGAATAG ACCATTATCA CCTTCAAAGT  
-950 AGCATTCCAA ATTATTGTGG GTTGTCCCTC CTACAGATAA TTA CTCTATA  
-900 ACCATATTAG ATGCAACTTA AATGTGTGAA ATAATGACTT TCTATT **CTGG**  
-850 **TTTAGATACA TCCAAG**GTGA CTTTTGTTTT AATTGATGGT AGAAAATTAT  
**P63RE**  
-800 TGAAAATGGC TCTAAAAATA AATTCAGTAG AGTTCATAAT AATTTTAAAA  
-750 TAA **GCATTAA TGATA**AAACA GTCTTAGAAA ATAAGACTAT GAAAAGAATC  
**Oct-1**  
-700 CCTCACCCAT CTACCATAA AGAGATGTTA GATGTTAGAT GTTATTTAAA  
-650 ATAATAGGAA ATGAACGGTT TTGTAGCATA CATAGATTGT ATTTACCTTT  
-600 CACTGTATTC ATGAACTCTT TGTGCCATAA ACTAAGAAAA ATGTATTGAG  
-550 CTGGTTTCTT CACTTATAAT TTGTTTCTAGCA TTTTCTAAAT AAGATTGTTC  
-500 TTAGGAAGTT ATACTAATTT TAAAACCTTA TTTTAGAATA AAATATAGTA  
-450 AATATATAAT GTAAATATAA ATGATATCAT CAATG **CCAAT** **TTGAGGAA**AT  
**NF-Y C/EBPβ**  
-400 CTAAGGTAAT TCTGTTTAAAT TTCTGTATAA GCTATATACA TAATG **CTTGC**  
-350 **TTACTATACG TG**TAACAATA TTTAAATTAT AAGATATTGT TTGGATTTTA  
**P63RE**  
-300 TACCACAAAG TACTTTGAAT AACAAATTGT CCCTGTCTTT AACAGTGAGA  
-250 TAATTCCATC TCTGGAAC TA **GCCCAAT**ATC GGCC **ATGTTT TTGCTTGATG**  
**NF-Y C/EBPβ P63RE**  
-200 **AAACAGG**TCC TTTTCTCTCA TACAATGTGA TGTGGAGGTT TGCCAAACTC

Specific region primers:

Sense primer, (-435) 5'-TATAAATGATATCATCAATG-3' (431), and antisense primer, (-186) 5'-TCTCTCATAACAATGTGATGT-3' (-168) yielding the 257 bp PCR fragment.

Non-specific region primers:

Sense primer, (-2000) 5'-CTCGAAATAATTTAGAATAT-3' (-1981), and antisense primer, (1890) 5'-GTTAAGATATGAGGTTTTAT-3' (-1871) yielding the 130 bp PCR fragment.

**Figure S3**

Mir-519a promoter sequence:

```
-2000 GTTTTGTTTG GTTGGTTATT TTTGAGACAA GGT CTGGCTC TGTCATCCAG
                                             P63RE
-1950 GCTGGAGTGT AGTGGTGTGA TCTCAGCTCA CTGCAACCTC CACCCCGAC
-1900 CTAAGCCTAC TGAATTAGTG TCTA CAGGCA CGCACTACCA CACCTGGCTC
                                             P63RE
-1850 ACTTTTGTAT TTTTGTACA CATGGGGTTT CACATG ATTG CCGGGGCTGG
                                             P53RE
-1800 TCTCAAACT CTGTGCTCAG GTGATCCTCC CATCACGGCC TCCTAAAGTG
                                             P63RE
-1750 CTGGAATTAG AGGTGTGAGC CGCCACGCC CACCTGTACT TGTGTATCTC
-1700 TGTTCAAATG TTTACTGAGGA GCTTTTACAG CGTAACCTGT GGTCTATCCT
-1650 GGAAAATGTT TGTGTGTGAG ACAATGTACA TTCTTCAACA TCTTAGATTG
-1600 CAGTTTGGAT GCTCCCGT CA GGACTGTGTG TCCCTGTGCT GGGACTCAAG
                                             P63RE
-1550 TGAACACTGG GCTCTCCATC CATTGCTGTT GTCTAGAAAT CCAGC CCAAT
                                             NF-Y
-1500 TCTCTTGGGT AAATATGAGG TATGTGTAGT AGGCATTGCT TTTTCTTTCT
-1450 GGAGACAAAG CT CAGGAGGA TTGCCCTTG ATAAACAAAG CTAACCTGCT
                                             P63RE
-1400 GATTCTTTGA AGCAAGGAAC TGGAGATGGT CTTTTAGGG GTTTATATTC
-1350 TGGATTCCAG AAAACATGCA AA CAGGACCA ATAAATGCGT GCTTATTTTTT
                                             P63RE
-1300 GTGTCTGTTT TAACCTGGTC AAGGAAAATT CCAACAAAAA ATCCACGATG
-1250 CTGGAG CATG AAGATCTCAG GCTGTGTCCC TCTAGAGGGA AGCGCTTTCT
                                             P53RE
-1200 GTTGTCTGAA AGAAAAGAAA ATGGTTCCTT TTAGAGTGTT ACGCTTTGAG
-1150 AAAAGCATCG CTGATCTTGG TAACACATTT GCAGAGAATG CTTATAATCA
-1100 GACGTGGATG ATGTTGAAGT TTTGCGTTTG TTTTGTTTTG TTTTTTTTCC
-1050 TAGACAGGGT GTCTGCTGCC CAAACTGGAG TGCGGTGGCA CTTCCAACCT
-1000 AGACCTCTTG GGTTTAAGTG GCCCTCTATT TTGGGATAGA GTCTTGCTCT
-950 GTGGCC CTGGCTGGAGTGCA GTGTCAGGAA CTCTGCTCAC TGCGACCTCT
                                             P63RE
-900 GCCTCCTAGG TTCAAGCGAT TCTCTTGCCT CAGCCTCCTG AGCAGCTGGG
-850 ATTACGGGCA TGTGCCACCA TGCCTGGCTA ATTTTTGTAT TTTTTATTAT
-800 TTATTTATTT ATTTATTTTT GAGACAGAGT CTCGCTCTGT CACCCAGGCT
-750 GAAGTGCAGT GGTGCGATCT TGGCTCACCG CAACCTCTAC CTCCCACCTC
-700 AGCCTCCTGA ACAGCTGTCT C CAGGCGTGC ACCACCACAC CTGGCTAACT
                                             P63RE
-650 TCTGTATTTG TTTTACAGTC ATGGTTTCAC CATGTTGCC C GGGCTCATCT
-600 TGAACCTCTG AGCTCAAGTG ATCCTCCCGC CTCAGCCTCC TAAAGTGCTG
-550 TGAGCCACCG TGTCCAACA CTACTTGTGT GTTTCCGTTT AAATTGTATT
-500 GAGGAGCTTT TACAGCATAG CTTGTGGTCT CTCCGGGAGA ATGTTTTTGT
-450 TTACGACAAT GTATATTCTT CAACATCGTA GATTCCATTT TGGATGCCCT
-400 CATTGGGACT GTGTGTC CCT GTACTGGAAC TCAAGTGAAC ACTTGGCTCA
                                             P63RE
```

Specific region primers:

Sense primer, (-1649) 5'-GAAAATGTTTGTGTGTGAG-3' (-1630), and antisense primer, (-1420) 5'-TAAACAAAGCTAACCTGCT-3' (-1401) yielding the 250 bp PCR fragment.

Non-specific region primers:

Sense primer, (-650) 5'-TCTGTATTTGTTTTACAGT-3' (-631) and antisense primer, (-540) 5'-TGTCCCAACAGTACTTGTGT-3' (-521) yielding the 130 bp PCR fragment.

**Figure S4**

Mir-374a promoter sequence:

```

-2250 TTATCGAAGA GACTTCTAGA ATTAGTTATT TGTCAAAAGA TTTGAACATT
-2200 ATAAAGAATT GGCATATTTA CTTTTCAAAA AATTAATGTC AGTTTTTGTA
                Oct-1                C/EBPβ
-2150 CCCAGTCATT TAGGTACTTA TAAAAAATGT TTTTGCTTTT TTTTTTTTTG
-2100 CTGACTCCAA TTGTAAATGA ATGAATGATA TCTCTGTGGG GTTTTTTTTGT
                NF-Y
-2050 TTTTGTTTTT TTCTGAGACA GGCTCTCCCC CTGTCGCCTA GGCTGGAGTA
                P63RE                P63RE
-2000 CAGTGGCGTG ATCATGGCTC ACTGAAGCCT CCAATTCCAG GGCTCCAGAG
                P63RE                NF-Y
-1950 ATCCTCCTAC CTCAGCCTCC TGAGTAGCGG GAGTACAGG TGTGTGCCACC
                P63RE
-1900 ATGTCCAGCT AATTTTTTAA TTTTTTTGTA GAGATGGAGT TTTGCCATGT
-1850 TGCTCAGGCT TGTCTTGAAC TCCTGGGCTC AAGTGATTTT CCCACCCCGG
                P63RE
-1800 CTTCCCAAAA TGCTGGGATT A CAGGGGTGA GCCACCATAC CTGGCCGATA
                P63RE
-1750 TCTTTGTTTT GTGATACAGT TCTCTGATTA TTAGTGAGGC TGGACTTTTA
-1700 GATCTTAATT ACTAGCTCTT ATTTCCTTTT GTGAATTATT CAATTTGTGC
-1650 CTGAATGTTA TTTGTAAGTT GCAAATGTCG TTTGTTGCAG ATATGCTCCC
-1600 AGTAATATTT GTTGCCATTG AGTCTGAAGA AATGTTTGCA ATTCCAAATA
                C/EBPβ
-1550 TAACTGCTGT GTGGATACAT GTCTGGTTCT TGGTAGCCAT TTTGAGATAA
-1500 CATTTGTCTG ACCTCTATCT TATTTTTGTT TTTATTTTTA GAGTGGAGGT
-1450 CTTGCCCATG CTGGTCTCGA ACTCCTGGGCTCAAGCAATC TTTCTGCCTC
                P53RE
-1400 CGCCTCCCAA AGTGCTGGGA TTACAGGCAT AAGCCACCTT ACCCAGCCTT
-1350 GTCTGACCTT TAAACAGAAA TCCATTTCTT TTTATCTAAA AGGAAAGCAC
-1300 TTTTGAGTAC TGTACAACAG TGGTGCTTCC TGGCCCTGGG CATGGGGAGA
                P63RE
-1250 AGACAGGGCA ACATTTTGTC CCTAATGAGA AACTAATTTA GACAAGAAAC
-1200 AAAACAGCGG TCCCTTCTCC CCCATCCAAT CAGGGACTGG TCTTATTTTA
                NF-Y
-1150 AATATTTCTG AGTGGTCTGA GGGAGGATAT GGGCAATATT GAAGTGTTCA
-1100 CATTATATA TACTGTTAAA TGCTTTGGGG ATGTGAAATG CTAATAGGAA
-1050 CAGGCTAGCA TGTGAGAAGG CACCATGAGT GGGCTAATTG GCAGAAAGGA
                P53RE
-1000 ACAGTGATA GGCAAGAGCA GTGAAATAAC TTTAGGGGAA AATAGTATGT
-950 TAAGCTTATT AAATAACAGC CTCATAGAGA CATTGGGTCC CAAAACAGTG
-900 ATCTCAGTAT AACTGTCAAC AACTTGCTGA TGTTATCAGC CCTATTTGCT
-850 GTTCAGAGAC AAAAAAGCCA GTAAAAACCT AGGTATTATT AAGAAAGGTA
-800 TGAGGCACAG AAAAAAGCCA TCTTATCTTT GTATAAAACC ATCTGAACCA
-750 AATAACTATT ACAGTAATAA TCTTGCCTCA AGGAGTCTGT TACTATCACT
-700 CACATGATTT TGAAAAGGGA GTGGGCAGAG TGTGTTATCT CTCTGTTTCA
-650 TTTTTTCTTGT TTATAATACA TAGGTGAATT AGATATTCTC AAAGGTCTTG

```

**IRF2**

-600 GAGGGGTCTA ATTCTGG**TTT CCGAAA**CTG AATGTTATTT CTAGTTTAGA  
**STAT**  
-550 GAATCTGTTT AATTATGTTT ATTAATAAAA CTTTTCTAAC TTATTCCTAC

Specific region primers:

Sense primer, (-2150) 5'-CCAGTCATTTAGGTACTTA-3' (-2131) and antisense primer, (1914)5'-ACAGGTGTGTGCCACCATGTC-3' (1895) yielding the 255 bp PCR fragment.

Non-specific region primers:

Sense primer, (-1000) 5'-ACAGTGTATAGGCAAGAGCA-3' (-981), and antisense primer, (-890) 5'-AACTGTCAACAACCTTGCTGA-3' (-871) yielding the 130 bp PCR fragment.

**Figure S5**Mir-630 promoter sequence:

-1700 GTTTGAGTGT CATA**AATCCA CGTGTTCCT**G TTGCAACAAA TACCCAAAAA  
**MAX**  
-1650 TTGTGTGTGC ACTTCCTAAT ACCAGTCTTC ACCCATGGAG GAACAGTGCT  
-1600 TTTTAGAGAT GCTTTCTATT TCAATGTTGG CATACTG**CCT GAGGGTATTG**  
**P63RE**  
-1550 CAGTTGTGGG TGCATTCCCT AATTTGTATG ATCAAGATGA ACTGGCCCTT  
-1500 **TTCTACTTCC AAG**CTTTTAA CAGATACCAC CATATTTGAC AGAATTCCCA  
-1450 GAGTGAATTG CTTGTGTTAT TAGTAGATT CAGTCCCA GCTGGGATAG  
-1400 G**CAAGCCATG ACAGCTTCCC TG**TTTCACCT ACAGAAGTCT TATCTGAGGG  
**P63RE**  
-1350 ATCTATTCAC AGTAAGCAC**C ATGGTCTCCA TGTCTTCAGG** TCAGTTTCAT  
**P53RE**  
-1300 T **GTCTTTTGA AAAGT** GCATG CTTCATT**TGA ACAATTCATT C**AGCAGCAGA  
**C/EBPβ Sox-5**  
-1250 TGGACTTTCA GTGATTTAAA ATAAAATTTT GATCCAAAGC T**CAGGACACA**  
-1200 **AACCACAGG**T GTAAAATTGA GTAGCATATA ATATCAGACT AAATTATCTG  
**P53RE**  
-1150 TAATTTTCCA CAACCCAGAT TGTATGTGTT TTATGTGTGT TTAAATAAAT  
-1100 ATGTTAG**ATA CACGTGTATA** CATAACCCA TATAACAG ATCCAAGACT  
**N-MYC**  
-1050 GG**CTGACTTC AT**TTGAAATG GTTGAATCTG CTG**TGTAATA AAGTG**GTTCA  
**AP-1 Oct-1**  
-1000 AC**CATGATTA GGACATG**AAA TTTAGTAGAA GAGGGA**AAAG GAGTTAATG**T  
**P53RE p300**  
-950 AACAAATTAT TTTAGCTACA AACCCCGGTA ATAGAGCACT TGGGGGATGG  
-900 GATGGGGTGG GTTGGTGAGA CAATG**CCAAT** TGTA AATTGA TTAAATGCTC  
**NF-Y**  
-850 CTAACCCTGT AATTTTGTGC ATAGAGCACC CTATGCTGTG GAAATAACTG  
-800 TTCTTAGATT TCATTGTAA**C TGGACTGTT CAGG**TTGCCA GAGGGAAAAG  
**P63RE**  
-750 ACATTCCTAA TTCTAATAAA ATAACTTTT ATTTTGTAT TCCATTAGTT  
-700 ACTTATGTTT ATTTTATAG TTAATAAATG ACTAAAGGTG GCTAATAGCC  
-650 ACCCGTATTA TGTGCCTTAT TCACTGTTCC CACTTAATAT AAAATGTCAA  
-600 AAATTGGTTG TTTCTTTGCA GGAAGTGTG AATGAGCCCA **TTCCCCCAAC**  
**STAT**  
-550 ATTTAACTT**G GTTAATGAAG CT**TTTCAGAGC ATTTTCTGAA AGATTTCCAA  
**Oct-1**  
-500 TTTCTGCATC TCAGATATTG AATTTAAATT GTTTGTGTTG TAACAGTGAT  
-450 ACAA AATGT TCAATAGCTC TTTGAATGCC ACTTTTTTTA AAGAAAATAC

-400 TTTAAAAGTC ATTCTTAGCT AACCTCAAAA CTCCTTTACA TTACTTTCAT  
-350 TTTAGCTCAC TCTTAAAGCT GATACTGTTA TATAGGGATG AAGGGAGAGT  
-300 TTTCTTAAAG AAGGTCCCAA AGTTGAAGAT CGTTTGTTCAT TGATACTCTG  
-250 GC **CAAGTCCA GGTTTTAGGA CATG**TTAATT TACTCTTATT TGGATCTGTA  
**P53RE**

Specific region primers:

Sense primer, (-899) 5'-ATGGGGTGGGTTGGTGAGA-3'(-881), and antisense primer, (670) 5'-ACTAAAGGTGGCTAATAGCC-3'(-651) yielding the 249 bp PCR product.

Non-specific region primers:

Sense primer, (-480) 5'-AATTTAAATTGTTTGTGTTG-3' (461), and antisense primer, (-380) 5'-ACTCCTTTACATTACTTTCA-3' (-351) yielding the 130 bp PCR product.

**Figure S6**

Mir-885-3p promoter sequence:

-2350 AGACTGGGTT **CCAAT**CCCAA CTCTACTCCT TAGCCAG**GGA CCCCCAACAA**  
**NF-Y C/EBPβ**  
-2300 GCTTCCCCC CTTTCTGATT ATAGCCCCAG CTCATGAGGT TGTGTTGAAA  
-2250 TCTGGAACCT CCAGAAATGT CCA**TTTCGCC** CTCTCATCCT TCATCTCAAA  
**E2F**  
-2200 TGTCTCCCCT TTCCACCTC TCTGGGCTAC CCCCTTCCTC TTCATCATCC  
-2150 AACTCCTCCC TACCTTCAG**C CTGCAGCAGC CTGCCTCCCC CAGG**GGGTGT  
**P63RE**  
-2100 TCCTTGATTA GTTTCTTCCC CAGTGTCTG AACTCCCTGC ATAACAGCCA  
-2050 TTTGGATGCT CTTTTTATG CACAACCAGA CACCATGGGC CTTTTACATC  
-2000 AGCGGGGAGG CTTGCTGGG CCTTCCAGTC TGATGATC**CT TGAGGAACAA**  
-1950 **CACAGAGAGA CCAGG**CTGGG GGCATTTGTG GTGTCGTTAT GGTGGTTGAG  
**P63RE**  
-1900 AAAGCCCTAG TGTCATCTCA TGCCTGTTT CAGCTTAGAA GAGGGCAGGA  
-1850 AACACTCCGC TCTGGTCAGT TGGTCCAACC ATGCTTGGCC TGTGACCCTG  
-1800 GACAGGTCCC TTCACCTCTC TGAGCCTCTG TGTCTGTGTC AGTGCAATGG  
-1750 GGAAGCTGGT GAGGCCTCCA CTGCCTGCC CA**CATGGCTG TTGTGGGGAC**  
**P53RE**  
-1700 **CACAGG**CATG CACACGTGTG ACTGTCCTTT GCAAACAAAC CCTGCGGTTG  
-1650 TGAGGTGCTG TATGGTGTGG AAGGAATGTG GCATCTGGAG GCAGAATGCC  
-1600 CAGGTTCCAG CCCTCCAACA GCTCCCCTG TGGCCTCTGC CCCTCAGAAC  
-1550 CTCAGTTTCC CCATCTGACA AGTGAGGGCA GACCAGCCTT CAGAAAGACT  
-1500 CAAATGACCT CAACACT**CAG GGCACCAAGG AAATCATCAA AACCATG**CAG  
**P53RE**  
-1450 GTTTCCCCTA CCTTCCTACC CTCCAGGGAC GGACA**GGCAG ACACGAGCC**C  
**Oct-1/C/EBPβ**  
-1400 ATGTCTGGTG TATCTTCAAA CGGGACAGAG TAAAAATATT CAGAAATTGC  
-1350 AAACATCATAT GTCTGCAGGG C**CAGGTAGGG AGAGCACATG** **TCCTTTGGCC**  
**P53RE C/EBPβ E2F**  
-1300 AAACCACAGC TGCTTCTGTG TGCTGCCTGC AGAAGCGCCA GC**CCAAT**CTG  
**NF-Y**  
-1250 ACCTCAGTGC TCACTTTGCA AGAGGAGCCA GAAATCCAGA TTTCCCTGTA  
-1200 CCAGCTCTCA ATGTTTAAGT ATTGGCAAGA AATTCCCACA TTTTAAGGTC  
-1150 CCTATGGGTC AAGCCACATA TGGGTGGGAC CTAGAGTGCA AACTCTGACC  
-1100 TAGGCCTATT TTTTAGCTTT GTATTTTAAG ATAATTTCAA ACTTTTCAGAA  
-1050 AAGTTGCAAG GATGGCACAA AGAATACGGG CATGCCCTTC ACTCTGATTC  
-1000 GGCTGTTGCT AACCTTTTGC CGTCTTTGCT CTCTGACAAA TCTCACTCTC  
-950 CTCCTCATCA TGCAGATGTG ATGGCCTTCT CCCGCTAGAC ACTGCAGGTG

-900 TGTCTCCCAA GAG **CAAGGGT ATTCTCATG**C ATAACCACAA CACAGCCATC  
**P53RE**

-850 AATTCAGGAA ACTTGACATT GATTCGGTAC TGTTACCTGC TGTGCCATCC  
-800 **ATATTCACAT TC**TG **CCAAT**T GTG **CCTGCAG CGTTCTCCA GG**CCAGGATCC  
**Oct-1 NF-Y P63RE**

-750 ATGTGGGGTC CTGCATGCCA CTTGGATGTC CTGCCTCTTT GGTCTCCTGC  
-700 ATGGAGCAGC GCCTCATCTT TTCATTGTCT TCATGGAAAG CCAGTGTTTT  
-650 TTAAACCCTC CTAGGTCATG AACTTCCGTG AGAGTTCCAC TAAAGCAGTG  
-600 ACCCCTCTTA TAAGGAACAG ATGCCCAGAC TCCTC **ATCTT GCAACATT**TC  
**C/EBPβ**

-550 AGGGGATTCA ATGATCCCTA GAGGACCCTG GTCCTATCCC AATTTGCAGC  
-500 TGGGGAAACT GAGACCCAGA GCAGAAGTGT AAGGCCCCAC AGAGGGCAGG  
-450 GGCAGGGCGG AAGCCAGACC CCAGCTCTGG GCTCTTCCTG TAGCCCCCAT  
-400 G **CAGGAGCCT GCCTCCTTG**T AGTAACTTCC ACTGGGAAAT GCAGGACTAG  
**P63RE**

-350 ACTAGATGCC ATCAATGTGG CAGTGGAAAG GGCTGGAGCC AGGGGGCCAG  
-300 GATGGCGGGG CTGTCTTCAA AAAACAGCAA GGCCTGGCTC CAGCAGGCCC  
-250 GATGGCTCAA CCCCCGCGAG ACCCCGACAC ACCCTCCTCC CTTCCCCCTG  
-200 CCAGCCAGAG CACTAACAGC ATGAGGTCAT GCAGGACATC GGTAACCCT  
-150 CTTGGGACTC TGCCACATC CCAGGACCTG CTGCCACCC CAC **CATGCAG**  
-100 **AAGGCCAGG**C ATGGGAGAGC CGGACCTGCC ACCACTGCCA CCGTCTCCAG  
**P53RE**

Specific region primers:

Sense primer, (-850) 5'-AATTCAGGAACTTGACA-3' (-832) and antisense primer, (-620) 5'-AGAGTTCCACTAAAGCAGTG-3' (601) yielding the 250 bp PCR fragment.

Non-specific region primers:

Sense primer, (-1250) 5'-ACCTCAGTGCTCACTTTGCA-3' (1231) and antisense primer, (-1140) 5'-AAGCCACATATGGGTGGGAC-3' (-1121) yielding the 130 bp PCR fragment.
