# Supplementary material
Source: PubMed Central journal article supplement (PMC3131951)
Supplement: cdd2010188x6.pdf [file cdd2010188x6.pdf]

**Table SI. MicroRNA signature. Wild type  $\Delta$ Np63 $\alpha$  cells exposed to cisplatin versus****control media.**

|      |                           |              |             |              |
|------|---------------------------|--------------|-------------|--------------|
| 3634 | IVGN-novel-miR_3634       | -4.445734905 | 6.486605955 | -4.79212388  |
| 3694 | IVGN-novel-miR_3694       | -3.989995803 | 3.683211737 | -4.180894337 |
| 3620 | IVGN-novel-miR_3620       | -3.17688451  | 4.031727057 | -4.043520561 |
| 3507 | IVGN-novel-miR_3507       | -2.553774897 | 3.228726179 | -3.871686317 |
| 3520 | IVGN-novel-miR_3520       | -1.867023254 | 4.042678221 | -3.647791459 |
| 2146 | hsa-miR-519a              | -2.24701252  | 3.190867254 | -3.766551331 |
| 3301 | IVGN-novel-miR_3301       | -1.759447389 | 4.605329251 | -3.385684147 |
| 3614 | IVGN-novel-miR_3614       | -1.710516676 | 8.255784151 | -3.272780112 |
| 1179 | hsa-miR-181a              | -2.019117578 | 3.199781932 | -3.238783373 |
| 3453 | IVGN-novel-miR_3453       | -1.621877349 | 5.175089406 | -3.077752773 |
| 3620 | hsa-miR-374a              | -1.692753935 | 3.093725664 | -2.899941089 |
| 3668 | IVGN-novel-miR_3668       | -1.5257482   | 5.791557028 | -2.879360046 |
| 3618 | IVGN-novel-miR_3618       | -1.514654804 | 6.664763916 | -2.857304526 |
| 3676 | IVGN-novel-miR_3676       | -1.474945132 | 8.395913564 | -2.77973072  |
| 3615 | IVGN-novel-miR_3615       | -1.443545484 | 7.041316424 | -2.71988468  |
| 3689 | IVGN-novel-miR_3689       | -1.421057059 | 7.291134092 | -2.67781642  |
| 1310 | hsa-miR-29c               | -1.234809795 | 4.345364231 | -2.614012672 |
| 3427 | IVGN-novel-miR_3427       | -1.386007083 | 9.939608965 | -2.613543339 |
| 2342 | hsa-miR-98                | -1.17688451  | 4.031727057 | -2.443520561 |
| 3601 | IVGN-novel-miR_3601       | -1.280539203 | 9.164996119 | -2.429297543 |
| 2931 | hsa-miR-22                | -1.001379509 | 5.957993234 | -1.971404697 |
| 1487 | hsa-miR-18b               | -1.012611208 | 3.538174123 | -1.715947277 |
| 3335 | IVGN-novel-miR_3335       | -1.036974846 | 3.536323257 | -1.715703772 |
| 2110 | hsa-miR-569               | -3.966383725 | 3.935030593 | -1.713149354 |
| 1323 | hsa-let-7d*               | -3.873687115 | 3.888682288 | -1.711587188 |
| 1924 | hsa-miR-374b              | -3.459428099 | 3.68155278  | -1.709997317 |
| 2757 | hsa-miR-128a;hsa-miR-128b | -3.355166698 | 4.274332371 | -1.703306698 |
| 2342 | hsa-miR-375               | -3.292773077 | 3.598225269 | -1.699941089 |
| 2217 | hsa-miR-517b              | -3.289972213 | 4.022429858 | -1.680933834 |
| 2146 | hsa-miR-10a               | -3.234809795 | 4.345364231 | -1.674012672 |
| 2150 | hsa-miR-598               | -3.2304761   | 7.789325484 | 1.673776461  |
| 2607 | hsa-miR-22*               | -2.995048692 | 4.50382149  | -1.672591179 |
| 2931 | hsa-miR-34c-3p            | -2.901379509 | 5.957993234 | -1.671404697 |
| 2986 | hsa-miR-492               | -2.853673668 | 3.378675565 | -1.670386597 |
| 3012 | hsa-miR-515-3p            | -2.763738503 | 4.285546713 | -1.669538854 |
| 1409 | hsa-miR-146a              | -2.644780311 | 8.220874345 | -1.654004731 |
| 1366 | hsa-miR-339-5p            | -2.480093016 | 3.667804604 | -1.649334376 |
| 1380 | hsa-miR-126               | -2.478259854 | 4.858534934 | -1.642249488 |
| 1064 | hsa-miR-100               | -2.262902195 | 7.127256661 | -1.639560141 |
| 3274 | hsa-miR-155               | -2.07217422  | 6.460133533 | -1.605199425 |
| 1361 | hsa-miR-148a              | -2.064929125 | 5.54193039  | -1.584134202 |
| 3245 | hsa-miR-30c-2*            | -2.037159263 | 4.123748461 | -1.574365648 |
| 1242 | hsa-miR-184               | -1.986458212 | 3.790879008 | -1.572629852 |
| 1182 | hsa-miR-125b              | -1.981348086 | 8.779508179 | -1.548618772 |
| 3015 | hsa-miR-101*              | -1.97394261  | 3.237259632 | -1.528402106 |
| 1850 | hsa-miR-18a*              | -1.972800172 | 4.134872461 | -1.525292524 |
| 2998 | hsa-miR-625               | -1.953050856 | 7.397598688 | -1.521924594 |
| 2237 | hsa-miR-146b-5p           | -1.906138111 | 3.870643764 | -1.518044574 |
| 3097 | hsa-miR-455-3p            | -1.849115455 | 8.38662006  | -1.502792229 |
| 2938 | hsa-miR-652               | -1.833891964 | 5.421059447 | -1.501975011 |
| 2996 | hsa-miR-27a*              | -1.803548821 | 6.42491883  | -1.490778511 |
| 1362 | hsa-miR-148b              | -1.778805607 | 5.355237153 | -1.489141973 |

|      |                                 |              |             |              |
|------|---------------------------------|--------------|-------------|--------------|
| 2328 | hsa-miR-659                     | -1.770794767 | 3.852695637 | -1.472418918 |
| 2563 | hsa-miR-199a-3p;hsa-miR-199b-3p | -1.769082773 | 4.694926209 | -1.468371926 |
| 2134 | hsa-miR-429                     | -1.758024896 | 5.036039488 | -1.452347517 |
| 3208 | hsa-miR-183*                    | -1.753369821 | 4.995516792 | -1.441451447 |
| 3217 | hsa-let-7e                      | -1.741244749 | 9.405219597 | -1.433234957 |
| 3294 | hsa-miR-30e*                    | -1.699437803 | 5.82966926  | -1.431743742 |
| 3022 | hsa-miR-421                     | -1.680163542 | 5.691440213 | 1.404642764  |
| 2903 | hsa-miR-362-3p                  | -1.606009336 | 4.9756944   | -1.404408646 |
| 1487 | hsa-miR-197                     | -1.592611208 | 3.538174123 | -1.385947277 |
| 3169 | hsa-miR-26b                     | -1.584755475 | 6.042418003 | -1.379569533 |
| 3183 | hsa-miR-361-3p                  | -1.584427229 | 5.659090291 | -1.368887141 |
| 3024 | hsa-miR-23a                     | -1.542444376 | 10.83255273 | -1.342876178 |
| 1959 | hsa-miR-532-5p                  | -1.523716781 | 4.808236961 | -1.315308552 |
| 1311 | hsa-miR-195                     | -1.522586395 | 4.154560486 | 1.303056562  |
| 2947 | hsa-miR-181a-2*                 | -1.507563049 | 5.80333379  | -1.293293539 |
| 1301 | hsa-miR-10b                     | -1.469459087 | 7.293156654 | -1.269180487 |
| 2340 | hsa-miR-133a                    | -1.457587722 | 5.072043677 | -1.246487493 |
| 3168 | hsa-miR-335                     | -1.454784569 | 4.285946147 | -1.241156255 |
| 3295 | hsa-miR-30a*                    | -1.452322769 | 4.936006903 | -1.236482764 |
| 2979 | hsa-miR-27b*                    | -1.446718728 | 6.702392181 | -1.225873719 |
| 2191 | hsa-miR-484                     | -1.446392752 | 5.902699394 | -1.225257878 |
| 3149 | hsa-miR-325                     | -1.404547051 | 3.626796857 | -1.217346529 |
| 3135 | hsa-miR-140-3p                  | -1.397533408 | 4.545387673 | -1.214507721 |
| 3099 | hsa-miR-24-2*                   | -1.397277193 | 6.187180566 | -1.214039888 |
| 3114 | hsa-miR-33a                     | -1.392402777 | 3.599878849 | -1.205155307 |
| 1015 | hsa-miR-181c                    | -1.373596309 | 5.922130953 | -1.191156779 |
| 2949 | hsa-miR-941                     | -1.361139159 | 3.829041954 | -1.188879394 |
| 2034 | hsa-miR-525-5p                  | -1.360061042 | 3.583707982 | -1.166960404 |
| 1313 | hsa-miR-15b                     | -1.310878039 | 10.24056544 | -1.148024857 |
| 2861 | hsa-miR-769-5p                  | -1.284765692 | 4.308484517 | -1.143424795 |
| 3297 | hsa-miR-96                      | -1.278434    | 5.561137992 | -1.142755259 |
| 1106 | hsa-miR-140-5p                  | -1.275691077 | 6.645146621 | -1.121147675 |
| 2772 | hsa-miR-151-5p                  | -1.264207025 | 10.09546816 | -1.101951507 |
| 1793 | hsa-miR-646                     | -1.263359768 | 7.157872897 | -1.100541318 |
| 2281 | hsa-miR-30c                     | -1.256083201 | 6.472655694 | -1.088464114 |
| 1014 | hsa-miR-132                     | -1.236326665 | 5.914422152 | -1.055978976 |
| 3574 | IVGN-novel-miR_3574             | -1.235196766 | 6.022957324 | -1.054134528 |
| 1183 | hsa-miR-331-3p                  | -1.234022295 | 4.538849347 | -1.052218852 |
| 1063 | hsa-miR-99b                     | -1.231077206 | 7.132162397 | -1.047421976 |
| 3296 | hsa-miR-182                     | -1.222597744 | 9.845857772 | -1.033665434 |
| 2922 | hsa-miR-28-5p                   | -1.208800479 | 6.971216584 | -1.031453723 |
| 3602 | IVGN-novel-miR_3602             | -1.201079275 | 6.942273858 | -1.029116027 |
| 2132 | hsa-miR-200b                    | -1.199629538 | 9.340459132 | -1.029080685 |
| 3063 | hsa-miR-125a-5p                 | -1.197700266 | 8.338648063 | -1.028737452 |
| 3625 | IVGN-novel-miR_3625             | -1.197458073 | 10.94417627 | -1.028352422 |
| 1392 | hsa-miR-149                     | -1.176656428 | 5.848633144 | -1.026522735 |
| 3023 | hsa-miR-23b                     | -1.171866275 | 11.18122845 | -1.025329611 |
| 1108 | hsa-miR-208                     | -1.171665527 | 4.742859804 | -1.025216128 |
| 3350 | IVGN-novel-miR_3350             | -1.159400629 | 8.10641001  | -1.023646109 |
| 2923 | hsa-miR-708                     | -1.156806244 | 3.769953862 | -1.022632975 |
| 3157 | hsa-miR-183                     | -1.150241388 | 7.909767297 | -1.021510276 |
| 1393 | hsa-miR-326                     | -1.13219639  | 6.577181601 | -1.019921893 |
| 3626 | IVGN-novel-miR_3626             | -1.125789245 | 11.266969   | -1.018208944 |
| 2915 | hsa-miR-193b                    | -1.117242169 | 8.025472796 | -1.016918927 |
| 3553 | IVGN-novel-miR_3553             | -1.116268238 | 10.05802614 | -1.016754961 |
| 3280 | hsa-miR-27b                     | -1.111697033 | 8.363075066 | -1.016096946 |
| 3030 | hsa-miR-200b*                   | -1.102403415 | 6.269056666 | -1.014712088 |

|      |                     |              |             |              |
|------|---------------------|--------------|-------------|--------------|
| 1940 | hsa-miR-502-5p      | -1.102367222 | 4.026211627 | -1.014707016 |
| 1485 | hsa-miR-27a         | -1.088579806 | 9.979533099 | -1.012645856 |
| 2948 | hsa-miR-665         | -1.085494881 | 3.544989697 | -1.012103293 |
| 3210 | hsa-miR-192         | -1.08455724  | 5.2357245   | -1.012074537 |
| 2332 | hsa-miR-592         | -1.082065349 | 3.987854804 | -1.011764684 |
| 3586 | IVGN-novel-miR_3586 | -1.069741184 | 5.922986153 | -1.009956768 |
| 3324 | IVGN-novel-miR_3324 | -1.069607154 | 8.059695039 | -1.009886177 |
| 3421 | IVGN-novel-miR_3421 | -1.065635042 | 7.391760919 | -1.009309009 |
| 3469 | IVGN-novel-miR_3469 | -1.06426399  | 7.363987363 | -1.009112803 |
| 3616 | IVGN-novel-miR_3616 | -1.054097291 | 9.072899715 | -1.008648564 |
| 1199 | hsa-miR-151-3p      | -1.042891007 | 9.199445687 | -1.008603525 |
| 2908 | hsa-miR-181b        | -1.042517228 | 10.93028331 | 1.008598185  |
| 1002 | hsa-miR-330-3p      | -1.039862345 | 8.703415195 | -1.008560314 |
| 1033 | hsa-let-7f          | -1.039042122 | 11.45548073 | -1.008548628 |
| 3054 | hsa-miR-301a        | -1.035416908 | 5.863257035 | -1.008497058 |
| 3596 | IVGN-novel-miR_3596 | -1.007768422 | 6.762517255 | -1.008107983 |
| 2909 | hsa-miR-181d        | -0.987780951 | 7.79658125  | -1.008102333 |
| 3106 | hsa-miR-23b*        | -0.986663939 | 6.006732384 | -1.008100748 |
| 3572 | IVGN-novel-miR_3572 | -0.976876877 | 9.14896394  | -1.008090166 |
| 1292 | hsa-miR-18a         | -0.974218571 | 8.445673267 | -1.007645706 |
| 3617 | IVGN-novel-miR_3617 | -0.967256436 | 9.860562073 | -1.007551191 |
| 3658 | IVGN-novel-miR_3658 | -0.947200745 | 7.32302749  | -1.007281278 |
| 1483 | hsa-miR-26a         | -0.934120553 | 11.701806   | -1.007255289 |
| 2791 | hsa-let-7g          | -0.928629942 | 10.44643122 | -1.007246756 |
| 3458 | IVGN-novel-miR_3458 | -0.926589712 | 9.524031028 | -1.007177564 |
| 3657 | IVGN-novel-miR_3657 | -0.922391862 | 6.955810104 | -1.006952856 |
| 3619 | IVGN-novel-miR_3619 | -0.89864233  | 5.120774186 | -1.006431072 |
| 3538 | IVGN-novel-miR_3538 | -0.862641591 | 6.792300065 | -1.006183641 |
| 3311 | IVGN-novel-miR_3311 | -0.861487782 | 7.201741308 | -1.006011037 |
| 1880 | hsa-miR-671-5p      | -0.858061055 | 3.50501824  | -1.006001585 |
| 2956 | hsa-miR-28-3p       | -0.854918601 | 6.38714639  | -1.005656705 |
| 3270 | hsa-miR-636         | -0.851848799 | 4.911649918 | -1.005482293 |
| 3504 | IVGN-novel-miR_3504 | -0.848972735 | 9.665221146 | -1.005121798 |
| 3250 | hsa-miR-629         | -0.847404341 | 6.300861764 | -1.004920829 |
| 3330 | IVGN-novel-miR_3330 | -0.833324072 | 10.23379292 | -1.004785999 |
| 2904 | hsa-miR-21*         | -0.826844004 | 6.412346748 | -1.003780802 |
| 3536 | IVGN-novel-miR_3536 | -0.813782682 | 10.0035217  | -1.003780436 |
| 1030 | hsa-let-7a          | -0.795366814 | 13.54617    | -1.003558585 |
| 3486 | IVGN-novel-miR_3486 | -0.78928356  | 4.714953444 | -1.003281602 |
| 1115 | hsa-miR-324-5p      | -0.786486942 | 5.784404661 | -1.003248694 |
| 1088 | hsa-miR-221         | -0.786094727 | 10.12674941 | -1.002740309 |
| 3277 | hsa-miR-361-5p      | -0.759265752 | 7.93094843  | -1.002628956 |
| 2516 | hsa-miR-320         | -0.749690092 | 9.234902165 | -1.002614316 |
| 3355 | IVGN-novel-miR_3355 | -0.7455731   | 9.736154803 | -1.002607664 |
| 3611 | IVGN-novel-miR_3611 | -0.744518002 | 5.742859842 | -1.002541428 |
| 1260 | hsa-miR-203         | -0.737230751 | 6.740818813 | -1.002530916 |
| 2894 | hsa-miR-20b         | -0.735104689 | 5.700533726 | -1.002526582 |
| 1287 | hsa-miR-200a        | -0.734918242 | 9.129760703 | -1.002464315 |
| 3189 | hsa-miR-886-5p      | -0.729789744 | 7.445375705 | -1.002397382 |
| 2005 | hsa-miR-130a        | -0.71754464  | 7.460183099 | -1.002264437 |
| 2985 | hsa-miR-423-3p      | -0.711341273 | 7.160372962 | -1.002237325 |
| 2926 | hsa-miR-224         | -0.710789374 | 7.493685218 | -1.002163997 |
| 1037 | hsa-miR-373         | -0.710432607 | 5.929404391 | -1.002094703 |
| 3404 | IVGN-novel-miR_3404 | -0.7090931   | 10.09461087 | -1.001976149 |
| 3599 | IVGN-novel-miR_3599 | -0.706104175 | 6.515993218 | -1.001962783 |
| 3456 | IVGN-novel-miR_3456 | -0.680847028 | 7.352638766 | -1.001838671 |
| 2182 | hsa-miR-92b         | -0.675442941 | 6.000019251 | -1.001797874 |

|      |                               |              |             |              |
|------|-------------------------------|--------------|-------------|--------------|
| 3304 | IVGN-novel-miR_3304           | -0.66936924  | 9.191182042 | -1.001776488 |
| 2282 | hsa-miR-30e                   | -0.664896775 | 5.883806066 | -1.001585483 |
| 3425 | IVGN-novel-miR_3425           | -0.658277767 | 9.16281515  | -1.001581975 |
| 1139 | hsa-miR-25                    | -0.657203145 | 8.613735721 | -1.001570292 |
| 3302 | IVGN-novel-miR_3302           | -0.650092218 | 9.193405784 | -1.001569501 |
| 3145 | hsa-miR-29b                   | -0.644094261 | 6.396459605 | -1.001562763 |
| 3395 | IVGN-novel-miR_3395           | -0.640339516 | 9.938967584 | -1.001558631 |
| 3211 | hsa-miR-345                   | -0.635682611 | 5.919608651 | -1.001553696 |
| 2259 | hsa-miR-516a-3p;hsa-miR-516b* | -0.62366369  | 6.383046319 | -1.001540999 |
| 3303 | IVGN-novel-miR_3303           | -0.614120697 | 9.292229345 | -1.001530618 |
| 3309 | IVGN-novel-miR_3309           | -0.612605065 | 9.996716828 | -1.001529654 |
| 2594 | hsa-miR-222                   | -0.609626988 | 9.439504039 | -1.001525642 |
| 2896 | hsa-miR-17                    | -0.60923198  | 10.49201426 | -1.001525449 |
| 3039 | hsa-miR-93                    | -0.607816099 | 9.25346497  | -1.001523959 |
| 3042 | hsa-miR-191                   | -0.606865652 | 8.626065445 | -1.001522941 |
| 3521 | IVGN-novel-miR_3521           | -0.593616524 | 11.00710033 | -1.001509028 |
| 3391 | IVGN-novel-miR_3391           | -0.585592195 | 9.941292394 | -1.001500849 |
| 1251 | hsa-miR-30d                   | -0.57392146  | 9.977547777 | -1.001488515 |
| 2584 | hsa-let-7d                    | -0.57231607  | 12.07795099 | -1.001486905 |
| 1312 | hsa-miR-15a                   | -0.541512243 | 8.354781563 | -1.001455738 |
| 2280 | hsa-miR-30b                   | -0.537755144 | 8.980607707 | -1.001451773 |
| 3125 | hsa-miR-302d                  | -0.533241996 | 4.116295039 | -1.001447613 |
| 2117 | hsa-miR-141                   | -0.530034518 | 7.740769108 | -1.001443943 |
| 2740 | hsa-miR-16                    | -0.524409673 | 10.92907098 | -1.001438312 |
| 2984 | hsa-miR-103                   | -0.523957103 | 11.40406465 | -1.001437378 |
| 3257 | hsa-miR-30a                   | -0.510279055 | 7.747197196 | -1.001432671 |
| 3442 | IVGN-novel-miR_3442           | -0.508124855 | 3.587481508 | -1.001422487 |
| 1368 | hsa-miR-205                   | -0.493068582 | 11.07730907 | -1.001412428 |
| 2329 | hsa-miR-493*                  | -0.49228498  | 5.147400672 | -1.001406036 |
| 3551 | IVGN-novel-miR_3551           | -0.490583843 | 10.46904167 | -1.001405013 |
| 2176 | hsa-miR-584                   | -0.476386816 | 5.043705807 | -1.001391945 |
| 3267 | hsa-miR-19a                   | -0.475977055 | 4.623686429 | -1.001390851 |
| 2983 | hsa-miR-107                   | -0.474943902 | 11.21588483 | -1.001384175 |
| 2936 | hsa-miR-425                   | -0.472876997 | 7.724235152 | -1.001383385 |
| 3480 | IVGN-novel-miR_3480           | -0.472572783 | 10.69200411 | -1.001375817 |
| 3412 | IVGN-novel-miR_3412           | -0.469902182 | 11.05474923 | -1.001365557 |
| 3682 | IVGN-novel-miR_3682           | -0.46804303  | 9.159290405 | -1.001363235 |
| 3488 | IVGN-novel-miR_3488           | -0.460740356 | 10.53968813 | -1.001362478 |
| 3472 | IVGN-novel-miR_3472           | -0.458081235 | 12.38109612 | -1.001361712 |
| 3701 | IVGN-novel-miR_3701           | -0.455740317 | 10.97783044 | -1.001361401 |
| 1054 | hsa-miR-92a                   | -0.441837871 | 10.22575313 | -1.001358627 |
| 3647 | IVGN-novel-miR_3647           | -0.434478027 | 11.09362438 | -1.001351795 |
| 2517 | hsa-miR-106a                  | -0.43208563  | 10.76014518 | -1.001349611 |
| 3549 | IVGN-novel-miR_3549           | -0.430669036 | 7.421579055 | -1.001347889 |
| 3698 | IVGN-novel-miR_3698           | -0.421996863 | 6.95905048  | -1.001339689 |
| 3606 | IVGN-novel-miR_3606           | -0.419884512 | 5.265850376 | -1.001337458 |
| 1952 | hsa-miR-200a*                 | -0.418130577 | 5.104324496 | -1.001336011 |
| 3487 | IVGN-novel-miR_3487           | -0.41345988  | 9.806173688 | -1.001331801 |
| 3413 | IVGN-novel-miR_3413           | -0.408422042 | 9.779923534 | -1.001327249 |
| 3009 | hsa-miR-130b                  | -0.402574432 | 8.419913459 | -1.001321822 |
| 1282 | hsa-miR-106b                  | -0.394216057 | 10.09270295 | -1.001314243 |
| 3673 | IVGN-novel-miR_3673           | -0.39381918  | 10.10725192 | -1.001313943 |
| 3128 | hsa-miR-200c                  | -0.385653148 | 12.65912079 | -1.001306112 |
| 3691 | IVGN-novel-miR_3691           | -0.384957111 | 9.573428561 | -1.001305867 |
| 3338 | IVGN-novel-miR_3338           | -0.375302868 | 9.872397449 | -1.001297832 |
| 3119 | hsa-miR-20a                   | -0.369457826 | 11.26366259 | -1.001291868 |
| 3403 | IVGN-novel-miR_3403           | -0.368592821 | 10.10253223 | -1.001291097 |

|      |                     |              |             |              |
|------|---------------------|--------------|-------------|--------------|
| 3702 | IVGN-novel-miR_3702 | -0.36540922  | 9.788855105 | -1.001288988 |
| 3604 | IVGN-novel-miR_3604 | -0.362379043 | 7.862940329 | -1.001285547 |
| 3565 | IVGN-novel-miR_3565 | -0.347033926 | 10.97019376 | -1.001271917 |
| 3672 | IVGN-novel-miR_3672 | -0.329779204 | 9.615686416 | -1.001268211 |
| 2916 | hsa-miR-452         | -0.327306382 | 7.436556513 | -1.001264828 |
| 2205 | hsa-miR-615-3p      | -0.319676816 | 4.414359199 | -1.001260537 |
| 3345 | IVGN-novel-miR_3345 | -0.317887048 | 9.565677674 | -1.001253598 |
| 3462 | IVGN-novel-miR_3462 | -0.317781958 | 11.20441135 | -1.001251283 |
| 3535 | IVGN-novel-miR_3535 | -0.313585345 | 9.745648768 | -1.001249418 |
| 3503 | IVGN-novel-miR_3503 | -0.309739587 | 10.03807316 | -1.001248948 |
| 3402 | IVGN-novel-miR_3402 | -0.306794627 | 10.25316109 | -1.001246981 |
| 3502 | IVGN-novel-miR_3502 | -0.302022746 | 10.34013904 | -1.001238763 |
| 2943 | hsa-miR-125a-3p     | -0.277451327 | 4.548309003 | -1.001235179 |
| 2958 | hsa-miR-371-5p      | -0.269162512 | 3.438819218 | -1.001235108 |
| 1044 | hsa-miR-24          | -0.264913469 | 12.91700866 | -1.001235079 |
| 3289 | hsa-miR-768-5p      | -0.257282801 | 10.51376332 | -1.001222594 |
| 3197 | hsa-miR-342-3p      | -0.251843477 | 5.398830872 | -1.001222466 |
| 3513 | IVGN-novel-miR_3513 | -0.249903248 | 11.9779117  | -1.001219365 |
| 3306 | IVGN-novel-miR_3306 | -0.249663665 | 9.664423334 | -1.001218892 |
| 3424 | IVGN-novel-miR_3424 | -0.240949288 | 10.97080638 | -1.001218776 |
| 1431 | hsa-let-7b          | -0.229701454 | 13.38887537 | -1.001217272 |
| 3534 | IVGN-novel-miR_3534 | -0.227645383 | 5.680233845 | -1.001215221 |
| 1268 | hsa-let-7c          | -0.226550128 | 12.95257018 | -1.001214033 |
| 3369 | IVGN-novel-miR_3369 | -0.221508187 | 5.903928799 | -1.001213651 |
| 3215 | hsa-miR-339-3p      | -0.212564294 | 5.025753642 | -1.001213587 |
| 3523 | IVGN-novel-miR_3523 | -0.210028001 | 11.66319567 | -1.001156719 |
| 3083 | hsa-miR-17*         | -0.208732526 | 6.118053396 | -1.001155672 |
| 2339 | hsa-miR-557         | -0.205942994 | 5.076711849 | -1.001153449 |
| 3385 | IVGN-novel-miR_3385 | -0.205111597 | 7.10169585  | -1.001152775 |
| 2291 | hsa-miR-210         | -0.199007604 | 10.35398974 | -1.001151479 |
| 1082 | hsa-miR-324-3p      | -0.198566233 | 5.383424469 | -1.001150475 |
| 3457 | IVGN-novel-miR_3457 | -0.198530483 | 8.572411834 | -1.001149528 |
| 3497 | IVGN-novel-miR_3497 | -0.193287    | 9.748801322 | -1.001146576 |
| 3351 | IVGN-novel-miR_3351 | -0.185635352 | 8.398586827 | -1.001145317 |
| 3463 | IVGN-novel-miR_3463 | -0.185109821 | 9.504847013 | -1.001143903 |
| 3475 | IVGN-novel-miR_3475 | -0.181542398 | 9.94189786  | -1.001140909 |
| 3570 | IVGN-novel-miR_3570 | -0.181394769 | 8.184958382 | -1.001139799 |
| 3566 | IVGN-novel-miR_3566 | -0.172341076 | 8.106324359 | -1.001138861 |
| 3343 | IVGN-novel-miR_3343 | -0.171409075 | 6.579912996 | -1.001136152 |
| 3490 | IVGN-novel-miR_3490 | -0.164003427 | 10.63153957 | -1.001134876 |
| 3518 | IVGN-novel-miR_3518 | -0.161328232 | 12.09383814 | -1.001131654 |
| 2877 | hsa-miR-548c-5p     | -0.154866793 | 4.42306493  | -1.001131588 |
| 3550 | IVGN-novel-miR_3550 | -0.150048697 | 9.637255444 | -1.001128999 |
| 3383 | IVGN-novel-miR_3383 | -0.14742139  | 9.626656029 | -1.001125889 |
| 3386 | IVGN-novel-miR_3386 | -0.141860917 | 7.341148603 | -1.001125369 |
| 3410 | IVGN-novel-miR_3410 | -0.139057983 | 9.051703364 | -1.001124515 |
| 3680 | IVGN-novel-miR_3680 | -0.138899459 | 8.424732593 | -1.001064862 |
| 3156 | hsa-miR-135a*       | -0.137374128 | 4.521188596 | -1.000999015 |
| 1315 | hsa-miR-21          | -0.136189645 | 11.11265614 | -1.000989673 |
| 1851 | hsa-miR-378         | -0.134775419 | 7.14235924  | -1.000979218 |
| 3365 | IVGN-novel-miR_3365 | -0.134425151 | 6.599649395 | -1.000976551 |
| 3681 | IVGN-novel-miR_3681 | -0.127245495 | 8.834784936 | -1.000922064 |
| 3248 | hsa-miR-612         | -0.124571129 | 4.880399932 | -1.000918605 |
| 3359 | IVGN-novel-miR_3359 | -0.123659798 | 6.699184382 | -1.000895168 |
| 3607 | IVGN-novel-miR_3607 | -0.115068284 | 8.007262862 | -1.000870305 |
| 3679 | IVGN-novel-miR_3679 | -0.107350285 | 8.734454407 | -1.000867899 |
| 3382 | IVGN-novel-miR_3382 | -0.106873088 | 9.541439642 | -1.000861894 |

|      |                     |              |             |              |
|------|---------------------|--------------|-------------|--------------|
| 3069 | hsa-miR-886-3p      | -0.106437932 | 5.227279274 | -1.000860668 |
| 3118 | hsa-miR-23a*        | -0.098056486 | 5.654142624 | -1.000833604 |
| 1092 | hsa-miR-31          | -0.096991815 | 12.33174155 | -1.008629102 |
| 3560 | IVGN-novel-miR_3560 | -0.094211435 | 10.91617709 | -1.007481772 |
| 3363 | IVGN-novel-miR_3363 | -0.082968868 | 5.82954579  | -1.007295478 |
| 3548 | IVGN-novel-miR_3548 | -0.082902104 | 4.440256369 | -1.006914629 |
| 3108 | hsa-miR-193b*       | -0.080507843 | 4.634710107 | -1.006739187 |
| 2992 | hsa-miR-25*         | -0.072666186 | 3.998517091 | -1.006598416 |
| 3466 | IVGN-novel-miR_3466 | -0.062140617 | 7.687861973 | -1.006443681 |
| 2245 | hsa-let-7i          | -0.048985812 | 11.88467018 | -1.006437407 |
| 3384 | IVGN-novel-miR_3384 | -0.047690661 | 7.257845917 | -1.006099089 |
| 3426 | IVGN-novel-miR_3426 | -0.040715329 | 8.851042811 | -1.006023721 |
| 2902 | hsa-miR-338-5p      | -0.038676058 | 4.114616559 | -1.005770773 |
| 3485 | IVGN-novel-miR_3485 | -0.030926553 | 8.513887217 | -1.005668069 |
| 3310 | IVGN-novel-miR_3310 | -0.030429895 | 9.924581739 | -1.005316413 |
| 3266 | hsa-miR-19b         | -0.029470464 | 8.053755774 | -1.004637435 |
| 3492 | IVGN-novel-miR_3492 | -0.027932924 | 6.531262599 | -1.003550279 |
| 3394 | IVGN-novel-miR_3394 | -0.027514923 | 9.276049083 | -1.003254922 |
| 3563 | IVGN-novel-miR_3563 | -0.018803843 | 7.214914995 | -1.003119141 |
| 2910 | hsa-miR-181c*       | -0.009669895 | 4.804519148 | -1.002725174 |
| 3171 | hsa-miR-768-3p      | -0.002765144 | 10.68509659 | -1.002191849 |
| 3564 | IVGN-novel-miR_3564 | 0.009858767  | 7.53949967  | 1.000085699  |
| 3415 | IVGN-novel-miR_3415 | 0.013498204  | 8.79014626  | 1.000010949  |
| 3613 | IVGN-novel-miR_3613 | 0.014606184  | 7.313243058 | 1.000011756  |
| 3573 | IVGN-novel-miR_3573 | 0.017321873  | 9.327553677 | 1.000012076  |
| 3624 | IVGN-novel-miR_3624 | 0.018051485  | 6.251441865 | 1.000012543  |
| 3316 | IVGN-novel-miR_3316 | 0.030465443  | 9.865051188 | 1.000021378  |
| 3378 | IVGN-novel-miR_3378 | 0.03584667   | 7.146240702 | 1.000025178  |
| 1913 | hsa-miR-644         | 0.03650558   | 4.903710351 | 1.000025627  |
| 3216 | hsa-miR-423-5p      | 0.040204708  | 8.103853805 | 1.000028219  |
| 3646 | IVGN-novel-miR_3646 | 0.046382541  | 6.228478445 | 1.000032672  |
| 3700 | IVGN-novel-miR_3700 | 0.050181503  | 7.345860284 | 1.000035397  |
| 2271 | hsa-miR-585         | 0.050928738  | 4.300491204 | 1.000035933  |
| 3341 | IVGN-novel-miR_3341 | 0.057415263  | 9.291047183 | 1.000040548  |
| 3514 | IVGN-novel-miR_3514 | 0.05905687   | 9.624136804 | 1.000041795  |
| 3643 | IVGN-novel-miR_3643 | 0.061261056  | 4.762420171 | 1.000043376  |
| 3473 | IVGN-novel-miR_3473 | 0.063111627  | 6.013266517 | 1.000044713  |
| 2230 | hsa-miR-494         | 0.068659655  | 9.129927291 | 1.000048789  |
| 3656 | IVGN-novel-miR_3656 | 0.082997721  | 5.741065362 | 1.000059262  |
| 3354 | IVGN-novel-miR_3354 | 0.085593645  | 9.225107022 | 1.000061127  |
| 3449 | IVGN-novel-miR_3449 | 0.103303732  | 4.28677436  | 1.000074607  |
| 3445 | IVGN-novel-miR_3445 | 0.112612493  | 9.90044769  | 1.000081119  |
| 3174 | hsa-miR-923         | 0.116359572  | 8.817996284 | 1.000083994  |
| 3346 | IVGN-novel-miR_3346 | 0.120688653  | 10.50324708 | 1.000087226  |
| 3401 | IVGN-novel-miR_3401 | 0.129662517  | 9.671239817 | 1.000094048  |
| 3372 | IVGN-novel-miR_3372 | 0.135807357  | 6.794854054 | 1.000098708  |
| 3517 | IVGN-novel-miR_3517 | 0.141959449  | 9.037378075 | 1.000103725  |
| 3595 | IVGN-novel-miR_3595 | 0.153964614  | 11.31360126 | 1.000112683  |
| 3697 | IVGN-novel-miR_3697 | 0.16228876   | 8.61808279  | 1.000119062  |
| 2898 | hsa-miR-520d-3p     | 0.163023069  | 4.109773658 | 1.000119792  |
| 3357 | IVGN-novel-miR_3357 | 0.176349236  | 9.703589361 | 1.000130728  |
| 3699 | IVGN-novel-miR_3699 | 0.177151426  | 9.695100191 | 1.000130923  |
| 3416 | IVGN-novel-miR_3416 | 0.188851888  | 7.233079949 | 1.000139845  |
| 3397 | IVGN-novel-miR_3397 | 0.197553479  | 8.757979299 | 1.000146744  |
| 3448 | IVGN-novel-miR_3448 | 0.204766886  | 9.780979722 | 1.000152508  |
| 3454 | IVGN-novel-miR_3454 | 0.20554546   | 10.91995104 | 1.000153242  |
| 3695 | IVGN-novel-miR_3695 | 0.213690389  | 9.408968938 | 1.000159076  |

|      |                     |             |             |             |
|------|---------------------|-------------|-------------|-------------|
| 2088 | hsa-miR-601         | 0.223471501 | 4.908179669 | 1.000167515 |
| 1455 | hsa-miR-328         | 0.227670025 | 4.343315363 | 1.000170931 |
| 2865 | hsa-miR-769-3p      | 0.235279629 | 5.192210811 | 1.000177132 |
| 3594 | IVGN-novel-miR_3594 | 0.23926538  | 11.31492777 | 1.000180393 |
| 3322 | IVGN-novel-miR_3322 | 0.24272916  | 10.30531031 | 1.000183271 |
| 3327 | IVGN-novel-miR_3327 | 0.245785773 | 9.253802589 | 1.000185735 |
| 3512 | IVGN-novel-miR_3512 | 0.249980169 | 8.610808831 | 1.000189193 |
| 3686 | IVGN-novel-miR_3686 | 0.261847401 | 10.98239977 | 1.000194013 |
| 3396 | IVGN-novel-miR_3396 | 0.261987577 | 9.693692421 | 1.000196129 |
| 3450 | IVGN-novel-miR_3450 | 0.264202777 | 9.79473819  | 1.000197218 |
| 2841 | hsa-miR-766         | 0.268957601 | 6.418933509 | 1.000204936 |
| 3543 | IVGN-novel-miR_3543 | 0.284064749 | 7.43906708  | 1.000217629 |
| 3506 | IVGN-novel-miR_3506 | 0.290027989 | 9.999034605 | 1.000222068 |
| 3262 | hsa-miR-593         | 0.290042274 | 4.951409657 | 1.000222604 |
| 3531 | IVGN-novel-miR_3531 | 0.294458733 | 9.990512294 | 1.000226464 |
| 3526 | IVGN-novel-miR_3526 | 0.303530351 | 6.561058821 | 1.000234168 |
| 3529 | IVGN-novel-miR_3529 | 0.314260626 | 3.458624342 | 1.000247467 |
| 3246 | hsa-miR-30c-1*      | 0.326679341 | 5.714247777 | 1.000254427 |
| 3505 | IVGN-novel-miR_3505 | 0.331811432 | 9.946750049 | 1.000258598 |
| 1884 | hsa-miR-564         | 0.338764367 | 3.641002639 | 1.000264968 |
| 3323 | IVGN-novel-miR_3323 | 0.347481483 | 3.393827162 | 1.000272364 |
| 3483 | IVGN-novel-miR_3483 | 0.348283607 | 3.864260131 | 1.000273068 |
| 3407 | IVGN-novel-miR_3407 | 0.35027651  | 10.25057021 | 1.000274806 |
| 3325 | IVGN-novel-miR_3325 | 0.377664693 | 3.796294292 | 1.000299262 |
| 3318 | IVGN-novel-miR_3318 | 0.391851267 | 9.728596897 | 1.000312081 |
| 3459 | IVGN-novel-miR_3459 | 0.394418912 | 10.51176281 | 1.000314414 |
| 3254 | hsa-miR-541         | 0.394819461 | 4.052284363 | 1.000314719 |
| 3515 | IVGN-novel-miR_3515 | 0.429183826 | 8.144669669 | 1.000346473 |
| 2999 | hsa-miR-342-5p      | 0.440599527 | 4.825693658 | 1.000357165 |
| 3447 | IVGN-novel-miR_3447 | 0.442525783 | 10.37244246 | 1.000358988 |
| 3576 | IVGN-novel-miR_3576 | 0.44584026  | 8.401314965 | 1.000362109 |
| 3423 | IVGN-novel-miR_3423 | 0.45167778  | 7.630729168 | 1.000367615 |
| 3470 | IVGN-novel-miR_3470 | 0.451762839 | 4.650489115 | 1.000367711 |
| 3387 | IVGN-novel-miR_3387 | 0.45672848  | 10.17925717 | 1.000372421 |
| 3591 | IVGN-novel-miR_3591 | 0.458497175 | 4.157174433 | 1.000374191 |
| 3319 | IVGN-novel-miR_3319 | 0.460250917 | 10.15205178 | 1.000375777 |
| 3084 | hsa-miR-29b-1*      | 0.462460185 | 5.73242373  | 1.000377849 |
| 1910 | hsa-miR-512-3p      | 0.474104868 | 4.550537543 | 1.000389001 |
| 3066 | hsa-miR-875-3p      | 0.4747687   | 3.923579698 | 1.000389699 |
| 1804 | hsa-miR-648         | 0.485582379 | 3.96828119  | 1.000400157 |
| 3337 | IVGN-novel-miR_3337 | 0.487807656 | 9.369580774 | 1.000402378 |
| 2165 | hsa-miR-196a        | 0.490927516 | 5.745033721 | 1.000405391 |
| 3376 | IVGN-novel-miR_3376 | 0.493510416 | 6.575271286 | 1.000406381 |
| 3582 | IVGN-novel-miR_3582 | 0.502582167 | 10.6069511  | 1.000416019 |
| 3623 | IVGN-novel-miR_3623 | 0.504034402 | 9.627128413 | 1.000418173 |
| 2267 | hsa-miR-449a        | 0.506474125 | 5.532963379 | 1.000420577 |
| 3332 | IVGN-novel-miR_3332 | 0.508437715 | 11.28431533 | 1.000422508 |
| 2900 | hsa-miR-551b*       | 0.520420066 | 5.393593766 | 1.000434372 |
| 3399 | IVGN-novel-miR_3399 | 0.528576824 | 9.457035011 | 1.000459504 |
| 3527 | IVGN-novel-miR_3527 | 0.538541034 | 9.905011108 | 1.000492589 |
| 3255 | hsa-miR-876-3p      | 0.543520188 | 4.243710611 | 1.000505554 |
| 3650 | IVGN-novel-miR_3650 | 0.557712891 | 11.0860147  | 1.000519395 |
| 3436 | IVGN-novel-miR_3436 | 0.559177314 | 6.739862239 | 1.000534286 |
| 3279 | hsa-miR-513-5p      | 0.580608845 | 8.617534112 | 1.000548027 |
| 3577 | IVGN-novel-miR_3577 | 0.582204667 | 8.848061548 | 1.000599362 |
| 3381 | IVGN-novel-miR_3381 | 0.584593333 | 5.0046944   | 1.000616218 |
| 3419 | IVGN-novel-miR_3419 | 0.590496359 | 8.453529757 | 1.000637167 |

|      |                     |             |             |             |
|------|---------------------|-------------|-------------|-------------|
| 3353 | IVGN-novel-miR_3353 | 0.596123482 | 8.331813846 | 1.000643307 |
| 3627 | IVGN-novel-miR_3627 | 0.611027816 | 11.38495437 | 1.000646946 |
| 3143 | hsa-miR-877         | 0.618035226 | 6.12762079  | 1.000783579 |
| 1247 | hsa-miR-34a         | 0.629702006 | 7.626034192 | 1.000945371 |
| 2981 | hsa-miR-219-1-3p    | 0.644872314 | 4.053055473 | 1.001010894 |
| 1943 | hsa-miR-425*        | 0.647779562 | 4.923011613 | 1.001024962 |
| 3091 | hsa-miR-202         | 0.65136256  | 3.717354349 | 1.001050904 |
| 2846 | hsa-miR-801         | 0.653647866 | 6.399849839 | 1.001140871 |
| 3390 | IVGN-novel-miR_3390 | 0.659490776 | 9.384545554 | 1.001225005 |
| 3628 | IVGN-novel-miR_3628 | 0.664217178 | 6.42344555  | 1.001278161 |
| 3675 | IVGN-novel-miR_3675 | 0.664643088 | 5.262562427 | 1.001376064 |
| 3477 | IVGN-novel-miR_3477 | 0.667116079 | 7.62981709  | 1.001435618 |
| 3233 | hsa-miR-214*        | 0.668918689 | 5.36110956  | 1.001480893 |
| 1321 | hsa-miR-196b        | 0.68267069  | 5.93269918  | 1.001508353 |
| 3590 | IVGN-novel-miR_3590 | 0.683084663 | 9.8656435   | 1.001568996 |
| 3422 | IVGN-novel-miR_3422 | 0.690453442 | 10.69910568 | 1.001590656 |
| 3438 | IVGN-novel-miR_3438 | 0.731583282 | 10.05362528 | 1.001690361 |
| 3094 | hsa-miR-509-3p      | 0.736292027 | 4.936789713 | 1.001888713 |
| 3188 | hsa-miR-877*        | 0.7370065   | 4.137161449 | 1.001913923 |
| 3393 | IVGN-novel-miR_3393 | 0.739736698 | 10.15881851 | 1.002071048 |
| 3655 | IVGN-novel-miR_3655 | 0.742706013 | 5.021314546 | 1.002119469 |
| 3011 | hsa-miR-550         | 0.748909349 | 4.056939054 | 1.002251907 |
| 3499 | IVGN-novel-miR_3499 | 0.779301083 | 9.713926728 | 1.002299207 |
| 3632 | IVGN-novel-miR_3632 | 0.798713557 | 4.155802438 | 1.002549289 |
| 3411 | IVGN-novel-miR_3411 | 0.800633236 | 9.938759369 | 1.002865509 |
| 3433 | IVGN-novel-miR_3433 | 0.813090163 | 10.05063476 | 1.002970737 |
| 3331 | IVGN-novel-miR_3331 | 0.815175254 | 9.815119959 | 1.003111879 |
| 3557 | IVGN-novel-miR_3557 | 0.817995247 | 8.847030097 | 1.003354508 |
| 3435 | IVGN-novel-miR_3435 | 0.820438876 | 7.698112566 | 1.003943121 |
| 3263 | hsa-miR-346         | 0.827275532 | 4.943140992 | 1.004131448 |
| 3677 | IVGN-novel-miR_3677 | 0.832144621 | 9.765968797 | 1.004299249 |
| 3644 | IVGN-novel-miR_3644 | 0.841943714 | 4.282567313 | 1.005463466 |
| 3342 | IVGN-novel-miR_3342 | 0.843632156 | 7.295896221 | 1.006562483 |
| 3568 | IVGN-novel-miR_3568 | 0.846806903 | 9.668615629 | 1.007515887 |
| 3629 | IVGN-novel-miR_3629 | 0.856521922 | 9.388433224 | 1.007667851 |
| 3608 | IVGN-novel-miR_3608 | 0.889261547 | 9.286175176 | 1.008227805 |
| 3006 | hsa-miR-92a-1*      | 0.902586566 | 4.48007169  | 1.008414599 |
| 3569 | IVGN-novel-miR_3569 | 0.913603871 | 7.704950147 | 1.008745246 |
| 3432 | IVGN-novel-miR_3432 | 0.913711183 | 9.147145068 | 1.009388537 |
| 3271 | hsa-miR-147         | 0.918935371 | 4.963275624 | 1.009719532 |
| 1891 | hsa-miR-663         | 0.922799763 | 4.042713584 | 1.015790788 |
| 3516 | IVGN-novel-miR_3516 | 0.93985295  | 6.649265576 | 1.018332698 |
| 2944 | hsa-miR-936         | 0.955399237 | 4.463307865 | 1.039116171 |
| 3256 | hsa-miR-29b-2*      | 0.959004228 | 5.241981759 | 1.043967673 |
| 3300 | hsa-miR-129-5p      | 0.967518754 | 5.620481838 | 1.055474541 |
| 3460 | IVGN-novel-miR_3460 | 0.969394844 | 10.64722402 | 1.058019109 |
| 3593 | IVGN-novel-miR_3593 | 0.974957659 | 7.969255724 | 1.075583509 |
| 3236 | hsa-miR-744         | 1.015402881 | 5.256273316 | 1.082146732 |
| 3437 | IVGN-novel-miR_3437 | 1.017385633 | 10.84281521 | 1.084247413 |
| 3320 | IVGN-novel-miR_3320 | 1.020765711 | 10.37145017 | 1.085995564 |
| 3666 | IVGN-novel-miR_3666 | 1.022166629 | 9.833797571 | 1.090966761 |
| 3559 | IVGN-novel-miR_3559 | 1.049043618 | 10.74893781 | 1.100095772 |
| 3587 | IVGN-novel-miR_3587 | 1.071974019 | 9.215578624 | 1.100107958 |
| 3253 | hsa-miR-675         | 1.076734578 | 4.413949826 | 1.100256545 |
| 2994 | hsa-miR-149*        | 1.081128692 | 7.481295634 | 1.100690643 |
| 3439 | IVGN-novel-miR_3439 | 1.103429663 | 13.39213858 | 1.101648758 |
| 3479 | IVGN-novel-miR_3479 | 1.114660921 | 9.128393028 | 1.105441085 |



|      |                     |             |             |             |
|------|---------------------|-------------|-------------|-------------|
| 3434 | IVGN-novel-miR_3434 | 1.11545285  | 6.148377229 | 1.106630072 |
| 3044 | hsa-miR-195*        | 1.132477713 | 4.64175955  | 1.112349355 |
| 2083 | hsa-miR-449b        | 1.151002315 | 5.185616437 | 1.120681231 |
| 3493 | IVGN-novel-miR_3493 | 1.154857206 | 5.24759456  | 1.122662284 |
| 3317 | IVGN-novel-miR_3317 | 1.17225067  | 10.56850409 | 1.125629993 |
| 2560 | hsa-miR-214         | 1.190371032 | 5.754325784 | 1.128211427 |
| 3546 | IVGN-novel-miR_3546 | 1.195881172 | 7.089281674 | 1.129847102 |
| 2278 | hsa-miR-654-5p      | 1.208899044 | 5.943848006 | 1.131611647 |
| 3203 | hsa-miR-432         | 1.216571411 | 4.536211551 | 1.132393728 |
| 3476 | IVGN-novel-miR_3476 | 1.218831223 | 5.245317608 | 1.132780755 |
| 2080 | hsa-miR-539         | 1.239836459 | 6.741842395 | 1.136717588 |
| 3392 | IVGN-novel-miR_3392 | 1.246812086 | 4.282247426 | 1.137164466 |
| 2810 | hsa-miR-193a-5p     | 1.249929909 | 5.080560891 | 1.137298681 |
| 3429 | IVGN-novel-miR_3429 | 1.254130156 | 5.241077801 | 1.138532925 |
| 3674 | IVGN-novel-miR_3674 | 1.256324137 | 5.107195994 | 1.138863031 |
| 3249 | hsa-miR-939         | 1.27542179  | 5.693093825 | 1.142095795 |
| 3026 | hsa-miR-188-5p      | 1.275988914 | 5.583655479 | 1.142647559 |
| 3540 | IVGN-novel-miR_3540 | 1.286174153 | 5.268738566 | 1.144804568 |
| 2231 | hsa-miR-493         | 1.296142953 | 5.467614824 | 1.145714687 |
| 3388 | IVGN-novel-miR_3388 | 1.313650412 | 10.86209871 | 1.149596941 |
| 3232 | hsa-miR-661         | 1.31669694  | 5.776373548 | 1.149951514 |
| 3522 | IVGN-novel-miR_3522 | 1.345204807 | 4.707452587 | 1.154062616 |
| 3603 | IVGN-novel-miR_3603 | 1.356536226 | 5.367494283 | 1.156196419 |
| 2955 | hsa-miR-125b-1*     | 1.357338158 | 7.135273997 | 1.156220196 |
| 3441 | IVGN-novel-miR_3441 | 1.359156835 | 4.405183973 | 1.156352069 |
| 3446 | IVGN-novel-miR_3446 | 1.381127365 | 6.915558305 | 1.160471832 |
| 2977 | hsa-miR-219-2-3p    | 1.399081284 | 4.895147627 | 1.163735816 |
| 1878 | hsa-miR-138         | 1.421852564 | 5.487910088 | 1.164293381 |
| 3199 | hsa-miR-330-5p      | 1.425617241 | 4.874498759 | 1.166294061 |
| 3191 | hsa-miR-187         | 1.426811434 | 6.459751574 | 1.168518564 |
| 1871 | hsa-miR-575         | 1.431484766 | 4.615702526 | 1.169741623 |
| 3498 | IVGN-novel-miR_3498 | 1.433787842 | 6.987719505 | 1.170550859 |
| 3247 | hsa-miR-30b*        | 1.448071276 | 6.723410791 | 1.172430463 |
| 3315 | IVGN-novel-miR_3315 | 1.471307157 | 4.218182674 | 1.177730036 |
| 3241 | hsa-miR-122         | 1.479247584 | 6.456859166 | 1.178032897 |
| 2864 | hsa-miR-765         | 1.501099222 | 7.144354988 | 1.183052989 |
| 3428 | IVGN-novel-miR_3428 | 1.502897221 | 11.58799305 | 1.183412881 |
| 3511 | IVGN-novel-miR_3511 | 1.51310779  | 10.67137822 | 1.184242257 |
| 3238 | hsa-miR-370         | 1.518920792 | 5.781883067 | 1.185765958 |
| 1377 | hsa-miR-127-3p      | 1.521860691 | 6.122412557 | 1.187611719 |
| 3508 | IVGN-novel-miR_3508 | 1.562268184 | 10.44415682 | 1.195177729 |
| 2249 | hsa-miR-571         | 1.564480343 | 5.272936863 | 1.197709464 |
| 2930 | hsa-miR-382         | 1.593897566 | 7.049431335 | 1.218637601 |
| 3468 | IVGN-novel-miR_3468 | 1.597483609 | 6.058683271 | 1.260150226 |
| 3547 | IVGN-novel-miR_3547 | 1.662915888 | 4.454226832 | 1.260558841 |
| 3494 | IVGN-novel-miR_3494 | 1.663598241 | 10.11640082 | 1.260956887 |
| 1991 | hsa-miR-674         | 1.663780022 | 6.021731929 | 1.262856091 |
| 2969 | hsa-miR-637         | 1.664242579 | 5.624555011 | 1.269472123 |
| 3347 | IVGN-novel-miR_3347 | 1.673345289 | 9.659108061 | 1.289533186 |
| 2921 | hsa-miR-99b*        | 1.678255255 | 7.082468318 | 1.300406709 |
| 2108 | hsa-miR-632         | 1.697440567 | 5.632177655 | 1.343250744 |
| 3104 | hsa-miR-920         | 1.704438653 | 4.138110305 | 1.359902101 |
| 2995 | hsa-miR-638         | 1.739275105 | 7.006930676 | 1.363867371 |
| 3669 | IVGN-novel-miR_3669 | 1.753646201 | 10.49182724 | 1.372097385 |
| 3013 | hsa-miR-194*        | 1.835925234 | 5.553666477 | 1.570002869 |
| 2221 | hsa-miR-645         | 1.841436454 | 5.2467129   | 1.583666671 |
| 3001 | hsa-miR-296-3p      | 1.851282698 | 7.031256755 | 1.608208478 |

|      |                     |             |             |             |
|------|---------------------|-------------|-------------|-------------|
| 3007 | hsa-miR-453         | 1.881498444 | 6.247588325 | 1.684575571 |
| 1865 | hsa-miR-383         | 1.908258054 | 5.247314146 | 1.723556123 |
| 3003 | hsa-miR-323-5p      | 1.966364588 | 6.325853176 | 1.730821548 |
| 2239 | hsa-miR-610         | 1.985860891 | 6.056566665 | 1.734989539 |
| 1863 | hsa-miR-485-5p      | 2.026754847 | 6.403646005 | 1.735972296 |
| 3219 | hsa-miR-574-5p      | 2.127060397 | 9.659077196 | 1.736265052 |
| 2917 | hsa-miR-483-5p      | 2.134596972 | 7.430389425 | 1.739144384 |
| 2993 | hsa-miR-92b*        | 2.164699167 | 5.182359415 | 1.763729262 |
| 3045 | hsa-miR-32*         | 2.25402115  | 8.320922356 | 1.770105418 |
| 2997 | hsa-miR-185*        | 2.279315782 | 7.245108502 | 1.784476689 |
| 3218 | hsa-miR-672         | 2.314449167 | 8.61604513  | 1.797414708 |
| 3240 | hsa-miR-206         | 2.428889107 | 7.921760901 | 1.818786358 |
| 1805 | hsa-miR-595         | 2.442219943 | 8.799414915 | 1.823477362 |
| 3000 | hsa-miR-608         | 2.645093985 | 7.978912096 | 1.825536464 |
| 2108 | hsa-miR-760         | 1.390540664 | 2.032177655 | 1.843250744 |
| 3081 | hsa-miR-185         | 1.230976493 | 2.136930676 | 2.23867371  |
| 2221 | hsa-miR-574         | 1.479478359 | 2.216712918 | 2.783666671 |
| 3007 | hsa-miR-453         | 1.208258054 | 2.347314146 | 3.353556123 |
| 3639 | IVGN-novel-miR_3639 | 1.790345472 | 6.335498334 | 3.458977123 |
| 3654 | IVGN-novel-miR_3654 | 1.812101943 | 7.464620885 | 3.511535312 |
| 3003 | hsa-miR-297         | 1.365363698 | 2.375853176 | 3.607821548 |
| 3545 | IVGN-novel-miR_3545 | 1.879370455 | 8.882218238 | 3.679144793 |
| 3670 | IVGN-novel-miR_3670 | 1.917839219 | 11.27255119 | 3.778567039 |
| 3509 | IVGN-novel-miR_3509 | 1.933143099 | 10.64181023 | 3.818862827 |
| 1189 | hsa-miR-194         | 2.364648491 | 2.488367941 | 3.839831123 |
| 3652 | IVGN-novel-miR_3652 | 1.942831522 | 5.377489621 | 3.844594716 |
| 3501 | IVGN-novel-miR_3501 | 1.970809413 | 6.011043531 | 3.919879791 |
| 3307 | IVGN-novel-miR_3307 | 1.984713356 | 5.350877401 | 3.957840178 |
| 3440 | IVGN-novel-miR_3440 | 2.050976869 | 5.324974219 | 4.143864613 |
| 2995 | hsa-miR-885-3p      | 2.464985889 | 2.527502041 | 4.284369581 |
| 3556 | IVGN-novel-miR_3556 | 2.120723595 | 5.614522529 | 4.349120239 |
| 3471 | IVGN-novel-miR_3471 | 2.282738106 | 7.97221258  | 4.866006023 |
| 3537 | hsa-miR-630         | 2.513714231 | 2.641374522 | 4.982432739 |
| 3579 | IVGN-novel-miR_3579 | 2.356791729 | 8.694513792 | 5.122299923 |
| 3389 | IVGN-novel-miR_3389 | 2.426670471 | 6.446673264 | 5.376511775 |
| 3537 | IVGN-novel-miR_3537 | 2.899184096 | 11.98115442 | 7.460043774 |
