# Supplementary material
Source: PubMed Central journal article supplement (PMC3131951)
Supplement: cdd2010188x7.pdf [file cdd2010188x7.pdf]

**Table SII. MicroRNA signature. Wild type  $\Delta$ Np63 $\alpha$  cells versus  $\Delta$ Np63 $\alpha$ -S385G cells upon cisplatin exposure.**

| Probe ID | miRNA Names                | Log2 Fold Change | Log2 Avg Signal | Linear Fold Change |
|----------|----------------------------|------------------|-----------------|--------------------|
| 2110     | hsa-miR-519a               | -4.268026451     | 3.294977273     | -19.26655133       |
| 1179     | hsa-miR-181a               | -4.220235788     | 3.271081941     | -18.63878337       |
| 1924     | hsa-miR-374a               | -3.966383725     | 3.935030593     | -15.63149354       |
| 1323     | hsa-miR-98                 | -3.873687115     | 3.888682288     | -14.65871886       |
| 2891     | hsa-miR-519b-3p            | -3.845580952     | 2.715271726     | -14.37590577       |
| 1310     | hsa-miR-29c                | -3.459428099     | 3.681552782     | -10.99997317       |
| 1489     | hsa-miR-204                | -3.403677461     | 2.494319981     | -10.58300524       |
| 1482     | hsa-miR-95                 | -3.372977189     | 2.478969845     | -10.36018018       |
| 2342     | hsa-miR-375                | -3.292773077     | 3.598225269     | -9.799941089       |
| 3020     | hsa-miR-208b               | -3.098198606     | 2.341580554     | -8.563488386       |
| 3537     | IVGN-novel-miR_3537        | -3.095386176     | 13.28022316     | -8.546810739       |
| 2607     | hsa-miR-22                 | -2.995048692     | 4.50382149      | -7.972591179       |
| 3148     | hsa-miR-411                | -2.992446554     | 2.288704527     | -7.958224258       |
| 2931     | hsa-miR-34c-3p             | -2.901379509     | 5.957993234     | -7.471404697       |
| 3559     | hsa-mir-18b                | -2.868316148     | 12.31949592     | -7.302123898       |
| 3579     | IVGN-novel-miR_3579        | -2.816053134     | 12.67391674     | -7.042331471       |
| 3012     | hsa-miR-206                | 2.763738503      | 4.285546713     | -6.791538854       |
| 3511     | IVGN-novel-miR_3511        | -2.645680546     | 12.75740418     | -6.257908422       |
| 1409     | hsa-miR-429                | -2.644780311     | 8.220874345     | -6.254004731       |
| 3564     | IVGN-novel-miR_3564        | -2.579555089     | 10.57517786     | -5.977553301       |
| 2950     | hsa-miR-132*               | -2.544464423     | 2.822100215     | -5.833915231       |
| 1366     | hsa-miR-339-3p             | -2.480093016     | 3.667804604     | -5.579334376       |
| 1380     | hsa-miR-203                | -2.478259854     | 4.858534934     | -5.572249488       |
| 1064     | hsa-miR-25                 | -2.262902195     | 7.127256661     | -5.499560141       |
| 3069     | hsa-miR-886-3p             | -2.427622728     | 6.934878627     | -5.380061736       |
| 3453     | IVGN-novel-miR_3453        | -2.405915739     | 7.262861443     | -5.299718527       |
| 3274     | hsa-miR-155                | -2.07217422      | 6.460133533     | -5.205199425       |
| 1361     | hsa-miR-148a; hsa-mir-148b | 2.064929125      | 5.54193039      | -5.184134202       |
| 3245     | hsa-miR-30c-2              | -2.037159263     | 4.12374a8461    | -5.104365648       |
| 1242     | hsa-miR-485                | -1.986458212     | 3.790879008     | -4.962629852       |
| 1182     | hsa-miR-382                | -1.981348086     | 8.779508179     | -4.948618772       |
| 3015     | hsa-miR-101                | -1.97394261      | 3.237259632     | -4.928402106       |
| 3470     | IVGN-novel-miR_3470        | -2.298378078     | 6.318555014     | -4.919044402       |
| 1850     | hsa-miR-18a                | -1.972800172     | 4.134872461     | -4.825292524       |
| 3545     | IVGN-novel-miR_3545        | -2.259585823     | 11.90111188     | -4.788539899       |
| 2998     | hsa-miR-625                | -1.953050856     | 7.397598688     | -4.771924594       |
| 3577     | IVGN-novel-miR_3577        | -2.216949157     | 11.89322679     | -4.649092585       |
| 2237     | hsa-miR-146b-3p            | -1.906138111     | 3.870643764     | -4.648044574       |
| 3097     | hsa-miR-455-3p             | -1.849115455     | 8.38662006      | -4.602792229       |
| 2938     | hsa-miR-214                | -1.833891964     | 5.421059447     | -4.564975011       |
| 2920     | hsa-miR-99a*               | -2.185179432     | 2.385070966     | -4.547833485       |
| 3422     | IVGN-novel-miR_3422        | -2.176276934     | 14.13000882     | -4.519856388       |
| 2996     | hsa-miR-27a                | -1.803548821     | 6.42491883      | -4.490778511       |
| 3590     | IVGN-novel-miR_3590        | -2.166722325     | 12.03828888     | -4.490021412       |
| 2328     | hsa-miR-659                | -1.770794767     | 3.852695637     | -4.312418918       |
| 3468     | IVGN-novel-miR_3468        | -2.104370193     | 9.3441012       | -4.300099947       |
| 3700     | IVGN-novel-miR_3700        | -2.099630665     | 9.961150235     | -4.285996481       |
| 3546     | IVGN-novel-miR_3546        | -2.086817043     | 10.2219707      | -4.248097985       |
| 3016     | hsa-miR-19b-1*             | -2.081272425     | 2.812195647     | -4.231802858       |

|      |                      |              |             |              |
|------|----------------------|--------------|-------------|--------------|
| 3243 | hsa-miR-565          | -2.049355686 | 5.295842041 | -4.139210694 |
| 2563 | hsa-miR-199a/199b-3p | -1.769082773 | 4.694926209 | -4.108371926 |
| 3650 | IVGN-novel-miR_3650  | -2.014023593 | 13.63334408 | -4.039071242 |
| 3208 | hsa-miR-183          | -1.753369821 | 4.995516792 | -3.971451447 |
| 3516 | IVGN-novel-miR_3516  | -1.977347367 | 9.429405923 | -3.937684076 |
| 3201 | hsa-miR-942          | -1.969436062 | 3.003921931 | -3.916150101 |
| 3347 | IVGN-novel-miR_3347  | -1.941921892 | 13.01139983 | -3.842171435 |
| 3606 | IVGN-novel-miR_3606  | -1.941801706 | 7.098157428 | -3.841851368 |
| 3032 | hsa-miR-628-5p       | -1.936963478 | 2.625820894 | -3.828988899 |
| 3656 | IVGN-novel-miR_3656  | -1.896327413 | 7.194323608 | -3.722643372 |
| 3339 | IVGN-novel-miR_3339  | -1.890679857 | 2.945339928 | -3.708099244 |
| 3576 | IVGN-novel-miR_3576  | -1.885087541 | 11.90294715 | -3.693753369 |
| 2903 | hsa-miR-362-3p       | -1.606009336 | 4.9756944   | -3.64408646  |
| 1487 | hsa-miR-197          | -1.592611208 | 3.538174123 | -3.515947277 |
| 2561 | hsa-miR-7            | -1.569082773 | 3.494926209 | -3.498371926 |
| 3247 | hsa-miR-221          | -1.541244749 | 3.405219597 | -3.443234957 |
| 3655 | IVGN-novel-miR_3655  | -1.768214596 | 5.990658441 | -3.406321459 |
| 3751 | hsa-miR-122          | -1.453369821 | 3.095516792 | -3.371451447 |
| 3575 | IVGN-novel-miR_3575  | -1.669925001 | 2.834962501 | -3.181980515 |
| 3587 | IVGN-novel-miR_3587  | -1.632547273 | 12.96396712 | -3.100599685 |
| 3646 | IVGN-novel-miR_3646  | -1.621794804 | 9.151273308 | -3.077576682 |
| 3668 | IVGN-novel-miR_3668  | -1.600011707 | 7.259844349 | -3.031457733 |
| 3527 | IVGN-novel-miR_3527  | -1.593282777 | 11.69838239 | -3.017351515 |
| 3012 | hsa-miR-515-3p       | -1.580380731 | 3.247662672 | -2.990487591 |
| 1937 | hsa-miR-433          | -1.555204879 | 3.614755684 | -2.938754574 |
| 2227 | hsa-miR-581          | -1.512767546 | 3.821025281 | -2.853569194 |
| 3586 | IVGN-novel-miR_3586  | -1.431140397 | 6.51874082  | -2.696597872 |
| 3521 | IVGN-novel-miR_3521  | -1.430308454 | 14.06652728 | -2.695043303 |
| 3332 | IVGN-novel-miR_3332  | -1.385852353 | 13.73553212 | -2.61326305  |
| 2171 | hsa-miR-381          | -1.368482797 | 3.206438458 | -2.581988897 |
| 3340 | IVGN-novel-miR_3340  | -1.349982652 | 2.2979546   | -2.549090602 |
| 3591 | IVGN-novel-miR_3591  | -1.328429273 | 5.91150445  | -2.511291105 |
| 3056 | hsa-miR-136*         | -1.299275062 | 4.045740397 | -2.461051865 |
| 1122 | hsa-miR-215          | -1.272160258 | 2.428561379 | -2.415229458 |
| 2937 | hsa-miR-501-3p       | -1.272160258 | 2.428561379 | -2.415229458 |
| 3571 | IVGN-novel-miR_3571  | -1.272160258 | 2.428561379 | -2.415229458 |
| 2245 | hsa-let-7i           | -1.257100652 | 12.81152728 | -2.390149157 |
| 3350 | IVGN-novel-miR_3350  | -1.256856545 | 8.069372353 | -2.389744773 |
| 3077 | hsa-miR-26a-1*       | -1.245926548 | 2.622963274 | -2.371708245 |
| 3272 | hsa-miR-26b*         | -1.245926548 | 2.622963274 | -2.371708245 |
| 3177 | hsa-miR-152          | -1.243999083 | 4.254558082 | -2.368541718 |
| 2217 | hsa-miR-517b         | -1.242554537 | 2.848997637 | -2.366171324 |
| 2837 | hsa-miR-450a         | -1.237862581 | 5.038942955 | -2.358488524 |
| 1431 | hsa-let-7b           | -1.221650308 | 13.32486968 | -2.33213339  |
| 3417 | IVGN-novel-miR_3417  | -1.214185604 | 5.431401766 | -2.320097772 |
| 3185 | hsa-miR-642          | -1.205229343 | 3.124811731 | -2.305739204 |
| 3467 | IVGN-novel-miR_3467  | -1.20373207  | 3.474647191 | -2.303347479 |
| 1380 | hsa-miR-126          | -1.192549997 | 6.486121234 | -2.285563651 |
| 3471 | IVGN-novel-miR_3471  | -1.188821764 | 10.27498454 | -2.279664889 |
| 1143 | hsa-miR-218          | -1.159637927 | 2.633473646 | -2.234013535 |
| 3657 | IVGN-novel-miR_3657  | -1.158666734 | 8.62514125  | -2.232510149 |
| 3533 | IVGN-novel-miR_3533  | -1.152956022 | 6.885391175 | -2.223690529 |
| 3124 | hsa-miR-302c         | -1.147727942 | 3.096061031 | -2.215646838 |
| 3589 | IVGN-novel-miR_3589  | -1.14047407  | 3.856998968 | -2.204534523 |
| 3526 | IVGN-novel-miR_3526  | -1.118625001 | 8.093224804 | -2.171399229 |
| 3658 | IVGN-novel-miR_3658  | -1.115086262 | 9.223507628 | -2.166079601 |
| 3671 | IVGN-novel-miR_3671  | -1.112597316 | 2.770532361 | -2.162345891 |

|      |                                                            |              |             |              |
|------|------------------------------------------------------------|--------------|-------------|--------------|
| 3189 | hsa-miR-886-5p                                             | -1.105361563 | 9.183715867 | -2.151527922 |
| 3183 | hsa-miR-361-3p                                             | -1.104172053 | 5.27016091  | -2.149754705 |
| 1268 | hsa-let-7c                                                 | -1.077915519 | 13.13176157 | -2.110983818 |
| 2262 | hsa-miR-1                                                  | -1.066713708 | 3.958950487 | -2.094656544 |
| 3128 | hsa-miR-200c                                               | -1.052557044 | 12.86109672 | -2.074202925 |
| 3599 | IVGN-novel-miR_3599                                        | -1.044321827 | 8.599315247 | -2.062396652 |
| 1942 | hsa-miR-501-5p                                             | -0.994319981 | 2.49715999  | -1.992141302 |
| 2584 | hsa-let-7d                                                 | -0.980917868 | 13.26785746 | -1.973720725 |
| 2034 | hsa-miR-525-5p                                             | -0.980708035 | 2.467076666 | -1.973433678 |
| 1033 | hsa-let-7f                                                 | -0.958455413 | 13.04571258 | -1.94322831  |
| 3433 | IVGN-novel-miR_3433                                        | -0.944027629 | 11.75654105 | -1.923891754 |
| 3594 | IVGN-novel-miR_3594                                        | -0.932628844 | 13.62509131 | -1.908750908 |
| 3619 | IVGN-novel-miR_3619                                        | -0.929165687 | 5.557662693 | -1.904174449 |
| 1038 | hsa-miR-369-3p                                             | -0.928561379 | 2.691003339 | -1.903377048 |
| 2791 | hsa-let-7g                                                 | -0.925039435 | 11.84271171 | -1.898736141 |
| 2895 | hsa-miR-372                                                | -0.921765172 | 3.616166614 | -1.894431759 |
| 2074 | hsa-miR-551b                                               | -0.921745986 | 3.273225802 | -1.894406565 |
| 3395 | IVGN-novel-miR_3395                                        | -0.919049388 | 11.84127879 | -1.890868963 |
| 1457 | hsa-miR-182*                                               | -0.915545002 | 3.69585434  | -1.886281512 |
| 3676 | IVGN-novel-miR_3676                                        | -0.896655788 | 8.223051915 | -1.861745394 |
| 3349 | IVGN-novel-miR_3349                                        | -0.870910328 | 3.228874448 | -1.828816504 |
| 3278 | hsa-miR-137                                                | -0.869028652 | 2.690555529 | -1.826432773 |
| 3040 | hsa-miR-10a*                                               | -0.864857905 | 2.938020906 | -1.821160287 |
| 3612 | IVGN-novel-miR_3612                                        | -0.857522961 | 3.11496994  | -1.81192465  |
| 2287 | hsa-miR-668                                                | -0.853759375 | 3.220298971 | -1.807204007 |
| 3513 | IVGN-novel-miR_3513                                        | -0.845670222 | 13.90267955 | -1.797099417 |
| 3595 | IVGN-novel-miR_3595                                        | -0.843908209 | 13.69796282 | -1.794905898 |
| 3151 | hsa-miR-454                                                | -0.842992827 | 5.698061606 | -1.793767401 |
| 3335 | IVGN-novel-miR_3335                                        | -0.839038653 | 6.280023031 | -1.78885773  |
| 3592 | IVGN-novel-miR_3592                                        | -0.838736913 | 3.182808679 | -1.788483629 |
| 3702 | IVGN-novel-miR_3702                                        | -0.831970392 | 12.61487616 | -1.780114933 |
| 1092 | hsa-miR-31                                                 | -0.823916076 | 12.43405688 | -1.77020455  |
| 1483 | hsa-miR-26a                                                | -0.815623377 | 12.10311022 | -1.760058494 |
| 3507 | IVGN-novel-miR_3507                                        | -0.814562767 | 3.51123306  | -1.758765048 |
| 3597 | IVGN-novel-miR_3597                                        | -0.813588446 | 3.108632953 | -1.757577767 |
| 3602 | IVGN-novel-miR_3602                                        | -0.811634933 | 8.736924626 | -1.755199394 |
| 2259 | hsa-miR-516a-3p;hsa-miR-516b*                              | -0.805582732 | 7.623077334 | -1.74785164  |
| 2935 | hsa-miR-362-5p                                             | -0.79493286  | 4.096004419 | -1.734996629 |
| 2916 | hsa-miR-452                                                | -0.787210443 | 7.965586901 | -1.7257344   |
| 3686 | IVGN-novel-miR_3686                                        | -0.786114665 | 12.42702048 | -1.724424142 |
| 3549 | IVGN-novel-miR_3549                                        | -0.783729112 | 10.09875136 | -1.721575094 |
| 2926 | hsa-miR-224                                                | -0.783046824 | 8.536203691 | -1.72076111  |
| 3295 | hsa-miR-30a*                                               | -0.782188602 | 5.276238048 | -1.719737777 |
| 3136 | hsa-miR-660                                                | -0.756782572 | 4.002521501 | -1.689718093 |
| 2890 | hsa-miR-541*                                               | -0.738904163 | 3.714646921 | -1.668907695 |
| 3082 | hsa-miR-106a*                                              | -0.730174099 | 2.790196979 | -1.658839262 |
| 3193 | hsa-miR-526a;hsa-miR-518d-5p;hsa-miR-518f*;hsa-miR-520c-5p | -0.723729488 | 2.884061804 | -1.651445648 |
| 1044 | hsa-miR-24                                                 | -0.722106285 | 12.85681687 | -1.64958862  |
| 2237 | hsa-miR-146b-5p                                            | -0.719129171 | 4.506988761 | -1.646188075 |
| 3268 | hsa-miR-933                                                | -0.712848771 | 4.529427787 | -1.639037396 |
| 3536 | IVGN-novel-miR_3536                                        | -0.712006433 | 12.34288854 | -1.6380807   |
| 1311 | hsa-miR-195                                                | -0.711334275 | 5.558919393 | -1.637317689 |
| 3435 | IVGN-novel-miR_3435                                        | -0.70875027  | 11.29939572 | -1.63438772  |
| 1037 | hsa-miR-373                                                | -0.70867933  | 6.681911556 | -1.634307357 |
| 3270 | hsa-miR-636                                                | -0.708469571 | 3.756269111 | -1.634069756 |
| 3364 | IVGN-novel-miR_3364                                        | -0.705162308 | 4.956297902 | -1.630328071 |

|      |                     |              |             |              |
|------|---------------------|--------------|-------------|--------------|
| 3366 | IVGN-novel-miR_3366 | -0.700568766 | 4.469772972 | -1.625145361 |
| 3169 | hsa-miR-26b         | -0.69790884  | 7.451909124 | -1.622151808 |
| 1030 | hsa-let-7a          | -0.696061941 | 14.00996625 | -1.620076503 |
| 3439 | IVGN-novel-miR_3439 | -0.69443541  | 12.88841237 | -1.618251016 |
| 3119 | hsa-miR-20a         | -0.693965608 | 12.50747279 | -1.617724132 |
| 2165 | hsa-miR-196a        | -0.690087026 | 4.622332845 | -1.613380837 |
| 3620 | IVGN-novel-miR_3620 | -0.689682033 | 5.071343882 | -1.612927993 |
| 1315 | hsa-miR-21          | -0.689443119 | 12.19988247 | -1.612660911 |
| 3227 | hsa-miR-33b         | -0.689255812 | 2.505591953 | -1.61245155  |
| 3146 | hsa-miR-34b*        | -0.689255812 | 2.505591953 | -1.61245155  |
| 3437 | IVGN-novel-miR_3437 | -0.684171678 | 12.63248385 | -1.606779186 |
| 3167 | hsa-miR-505         | -0.683634714 | 3.597842552 | -1.606181262 |
| 1778 | hsa-miR-329         | -0.681987082 | 3.001355713 | -1.604347967 |
| 1301 | hsa-miR-10b         | -0.669596884 | 7.794786987 | -1.590628454 |
| 2332 | hsa-miR-592         | -0.664151171 | 3.932295444 | -1.584635657 |
| 2984 | hsa-miR-103         | -0.660765122 | 11.83590392 | -1.580920831 |
| 1015 | hsa-miR-181c        | -0.658177886 | 7.264339504 | -1.57808825  |
| 3326 | IVGN-novel-miR_3326 | -0.643284294 | 3.018345477 | -1.561880736 |
| 3434 | IVGN-novel-miR_3434 | -0.63628916  | 7.96530016  | -1.55432604  |
| 2205 | hsa-miR-615-3p      | -0.633716949 | 3.673050351 | -1.551557269 |
| 2740 | hsa-miR-16          | -0.633647673 | 12.85517789 | -1.551482768 |
| 3603 | IVGN-novel-miR_3603 | -0.632305267 | 7.583365696 | -1.550039807 |
| 3515 | IVGN-novel-miR_3515 | -0.631741505 | 10.57853806 | -1.549434217 |
| 3341 | IVGN-novel-miR_3341 | -0.622119907 | 12.30775966 | -1.539135137 |
| 3428 | IVGN-novel-miR_3428 | -0.619066008 | 13.45424802 | -1.535880539 |
| 3583 | IVGN-novel-miR_3583 | -0.617969875 | 3.795512594 | -1.534714049 |
| 3432 | IVGN-novel-miR_3432 | -0.615348817 | 10.65439848 | -1.531928344 |
| 2339 | hsa-miR-557         | -0.605489762 | 4.789567025 | -1.521495178 |
| 2901 | hsa-miR-944         | -0.601689699 | 4.467553264 | -1.517492829 |
| 1793 | hsa-miR-646         | -0.589559324 | 9.330416501 | -1.504787035 |
| 1393 | hsa-miR-326         | -0.589005664 | 7.108532651 | -1.504209657 |
| 3497 | IVGN-novel-miR_3497 | -0.588881836 | 12.49529377 | -1.504080555 |
| 1313 | hsa-miR-15b         | -0.587022424 | 12.41347622 | -1.502143275 |
| 1474 | hsa-miR-302c*       | -0.583636028 | 4.63174991  | -1.498621472 |
| 3636 | IVGN-novel-miR_3636 | -0.583171104 | 5.680783251 | -1.498138537 |
| 3478 | IVGN-novel-miR_3478 | -0.579367867 | 4.299791237 | -1.494194407 |
| 3152 | hsa-let-7b*         | -0.574657233 | 3.085312376 | -1.489323576 |
| 2952 | hsa-miR-221*        | -0.571894271 | 4.834023899 | -1.486474043 |
| 3604 | IVGN-novel-miR_3604 | -0.570261647 | 9.79628613  | -1.484792828 |
| 3518 | IVGN-novel-miR_3518 | -0.569917045 | 14.28696158 | -1.484438213 |
| 3449 | IVGN-novel-miR_3449 | -0.569558239 | 5.255056454 | -1.484069071 |
| 3276 | hsa-miR-340         | -0.566336142 | 2.935000649 | -1.480758268 |
| 3370 | IVGN-novel-miR_3370 | -0.563747188 | 5.327787135 | -1.478103391 |
| 3090 | hsa-miR-505*        | -0.56234223  | 5.1909792   | -1.476664652 |
| 1054 | hsa-miR-92a         | -0.561051602 | 12.1288571  | -1.475344226 |
| 3685 | IVGN-novel-miR_3685 | -0.559414219 | 2.702414979 | -1.473670738 |
| 3416 | IVGN-novel-miR_3416 | -0.558957946 | 10.19216685 | -1.473204742 |
| 2336 | hsa-miR-587         | -0.558011752 | 3.464504077 | -1.472238854 |
| 3477 | IVGN-novel-miR_3477 | -0.556294213 | 9.704309408 | -1.470487186 |
| 3226 | hsa-miR-143*        | -0.553457602 | 3.12694866  | -1.467598771 |
| 1101 | hsa-miR-154         | -0.543887566 | 3.012822709 | -1.457895756 |
| 2517 | hsa-miR-106a        | -0.540244543 | 12.16060455 | -1.454218993 |
| 1851 | hsa-miR-378         | -0.538197932 | 7.921787654 | -1.452157497 |
| 1860 | hsa-miR-504         | -0.530700272 | 4.430808575 | -1.444630237 |
| 2607 | hsa-miR-22*         | -0.521033058 | 5.521895261 | -1.434982416 |
| 3030 | hsa-miR-200b*       | -0.515164597 | 5.839647074 | -1.429157183 |
| 3368 | IVGN-novel-miR_3368 | -0.512622504 | 5.223081603 | -1.426641162 |

|      |                                 |              |             |              |
|------|---------------------------------|--------------|-------------|--------------|
| 3617 | IVGN-novel-miR_3617             | -0.509353378 | 11.4330814  | -1.423412073 |
| 3638 | IVGN-novel-miR_3638             | -0.508610161 | 3.92334945  | -1.422678979 |
| 3277 | hsa-miR-361-5p                  | -0.508043493 | 9.142642411 | -1.422120282 |
| 3006 | hsa-miR-92a-1*                  | -0.507436057 | 3.346484005 | -1.421521636 |
| 3496 | IVGN-novel-miR_3496             | -0.50345145  | 2.57307628  | -1.417600925 |
| 3492 | IVGN-novel-miR_3492             | -0.499534104 | 7.266926368 | -1.413756938 |
| 1108 | hsa-miR-208                     | -0.490601268 | 5.164780545 | -1.405030324 |
| 3618 | IVGN-novel-miR_3618             | -0.485042113 | 8.164570562 | -1.399626721 |
| 3534 | IVGN-novel-miR_3534             | -0.481197713 | 6.308337677 | -1.395902051 |
| 3049 | hsa-miR-106b*                   | -0.479445284 | 3.707299391 | -1.394207491 |
| 2882 | hsa-miR-497*                    | -0.479089912 | 3.304186465 | -1.393864105 |
| 3569 | IVGN-novel-miR_3569             | -0.477476612 | 8.518802323 | -1.392306282 |
| 1957 | hsa-miR-500*                    | -0.475625704 | 3.974757232 | -1.390521165 |
| 3239 | hsa-miR-7                       | -0.469655371 | 5.778183864 | -1.384778634 |
| 2342 | hsa-miR-375                     | -0.465284838 | 4.396415971 | -1.380589902 |
| 3421 | IVGN-novel-miR_3421             | -0.463114649 | 8.361118681 | -1.378514697 |
| 3365 | IVGN-novel-miR_3365             | -0.458199931 | 7.239665357 | -1.373826607 |
| 2938 | hsa-miR-652                     | -0.456629603 | 5.88528894  | -1.372332054 |
| 1367 | hsa-miR-211                     | -0.448993084 | 3.897661313 | -1.365087174 |
| 2846 | hsa-miR-801                     | -0.447075459 | 7.004863547 | -1.363273911 |
| 1141 | hsa-miR-186                     | -0.441733173 | 4.037961491 | -1.358235055 |
| 2983 | hsa-miR-107                     | -0.439522652 | 11.67557467 | -1.356155539 |
| 3100 | hsa-miR-185                     | -0.438349806 | 9.322615813 | -1.355053494 |
| 3213 | hsa-miR-589                     | -0.438226785 | 2.738317292 | -1.35493795  |
| 2563 | hsa-miR-199a-3p;hsa-miR-199b-3p | -0.437142721 | 6.273170288 | -1.353920211 |
| 3373 | IVGN-novel-miR_3373             | -0.435918816 | 5.057407872 | -1.352772105 |
| 3262 | hsa-miR-593                     | -0.432197878 | 4.50813951  | -1.349287588 |
| 1455 | hsa-miR-328                     | -0.431486735 | 4.682528128 | -1.348622652 |
| 2914 | hsa-miR-708*                    | -0.430618992 | 3.495762883 | -1.347811735 |
| 2117 | hsa-miR-141                     | -0.429866179 | 7.903303513 | -1.347108616 |
| 3443 | IVGN-novel-miR_3443             | -0.42510993  | 2.505036215 | -1.342674807 |
| 3554 | IVGN-novel-miR_3554             | -0.423998453 | 3.457925775 | -1.341640786 |
| 1106 | hsa-miR-140-5p                  | -0.416232369 | 7.281918914 | -1.334438085 |
| 1115 | hsa-miR-324-5p                  | -0.401425164 | 6.114441954 | -1.320812028 |
| 3294 | hsa-miR-30e*                    | -0.399480668 | 6.581432838 | -1.319033009 |
| 3605 | IVGN-novel-miR_3605             | -0.398103491 | 3.839563149 | -1.317774478 |
| 2772 | hsa-miR-151-5p                  | -0.395913012 | 11.37254458 | -1.315775187 |
| 3196 | hsa-miR-628-3p                  | -0.394502664 | 3.901254752 | -1.314489542 |
| 3343 | IVGN-novel-miR_3343             | -0.388880188 | 7.141222301 | -1.309376679 |
| 3280 | hsa-miR-27b                     | -0.388360367 | 9.137583649 | -1.308904979 |
| 3192 | hsa-miR-139-5p                  | -0.383043198 | 2.932400525 | -1.304089783 |
| 3588 | IVGN-novel-miR_3588             | -0.376032928 | 6.038188496 | -1.297768387 |
| 3202 | hsa-miR-526b                    | -0.375933574 | 3.141412085 | -1.297679016 |
| 3168 | hsa-miR-335                     | -0.365213324 | 5.740291274 | -1.288072076 |
| 3359 | IVGN-novel-miR_3359             | -0.362244172 | 7.179305916 | -1.285423873 |
| 2146 | hsa-miR-10a                     | -0.357511212 | 5.705639111 | -1.281213773 |
| 3614 | IVGN-novel-miR_3614             | -0.349357004 | 8.916435146 | -1.273992694 |
| 3626 | IVGN-novel-miR_3626             | -0.347975608 | 13.95408764 | -1.272773416 |
| 2923 | hsa-miR-708                     | -0.337010751 | 5.145662272 | -1.263136674 |
| 2291 | hsa-miR-210                     | -0.336172035 | 9.953234151 | -1.262402559 |
| 2896 | hsa-miR-17                      | -0.333210285 | 11.75774511 | -1.259813595 |
| 3369 | IVGN-novel-miR_3369             | -0.33136942  | 6.637144925 | -1.25820711  |
| 3643 | IVGN-novel-miR_3643             | -0.329908679 | 6.57810604  | -1.256933809 |
| 1366 | hsa-miR-339-5p                  | -0.327475383 | 6.948102622 | -1.254815611 |
| 2097 | hsa-miR-550*                    | -0.325589537 | 4.469059932 | -1.253176427 |
| 3024 | hsa-miR-23a                     | -0.325486144 | 12.50909594 | -1.253086619 |
| 3454 | IVGN-novel-miR_3454             | -0.324880861 | 12.65590928 | -1.252560997 |

|      |                     |              |             |              |
|------|---------------------|--------------|-------------|--------------|
| 3250 | hsa-miR-629         | -0.322680727 | 6.438227513 | -1.250652276 |
| 2101 | hsa-miR-627         | -0.315514133 | 3.738932888 | -1.24445506  |
| 2138 | hsa-miR-365         | -0.311541227 | 4.896034119 | -1.241032784 |
| 2340 | hsa-miR-133a        | -0.307691976 | 6.23302889  | -1.237726    |
| 3257 | hsa-miR-30a         | -0.307419296 | 8.429158755 | -1.237492083 |
| 3050 | hsa-miR-892a        | -0.305598105 | 2.640620231 | -1.235930917 |
| 3025 | hsa-miR-623         | -0.304328433 | 2.521217403 | -1.23484369  |
| 2162 | hsa-miR-503         | -0.297085853 | 5.052084223 | -1.228660095 |
| 3023 | hsa-miR-23b         | -0.291850059 | 12.19995719 | -1.224209153 |
| 3363 | IVGN-novel-miR_3363 | -0.288216097 | 6.97378155  | -1.221129408 |
| 3217 | hsa-let-7e          | -0.286466245 | 10.15894578 | -1.219649192 |
| 3615 | IVGN-novel-miR_3615 | -0.28646515  | 8.541418015 | -1.219648266 |
| 2894 | hsa-miR-20b         | -0.277427571 | 6.783552694 | -1.212031817 |
| 2910 | hsa-miR-181c*       | -0.270628456 | 5.953075808 | -1.206333207 |
| 2209 | hsa-miR-486-5p      | -0.269500628 | 3.018812118 | -1.205390524 |
| 3178 | hsa-miR-520a-5p     | -0.265257358 | 2.71759118  | -1.201850425 |
| 3625 | IVGN-novel-miR_3625 | -0.264954869 | 13.89117792 | -1.20159846  |
| 2949 | hsa-miR-941         | -0.261119089 | 4.632496274 | -1.198407941 |
| 1323 | hsa-let-7d*         | -0.261104539 | 4.362975453 | -1.198395855 |
| 3372 | IVGN-novel-miR_3372 | -0.259912562 | 8.135946751 | -1.197406131 |
| 2992 | hsa-miR-25*         | -0.256235189 | 5.041561624 | -1.194357876 |
| 3371 | IVGN-novel-miR_3371 | -0.25595975  | 3.110101964 | -1.194129872 |
| 1145 | hsa-miR-7-1*        | -0.255154172 | 4.756593834 | -1.193463275 |
| 2402 | hsa-miR-502-3p      | -0.252726448 | 3.750493439 | -1.191456639 |
| 1943 | hsa-miR-425*        | -0.244886739 | 6.456288567 | -1.184999737 |
| 1883 | hsa-miR-650         | -0.24452211  | 4.618002451 | -1.184700276 |
| 3522 | IVGN-novel-miR_3522 | -0.24309942  | 4.996513608 | -1.18353258  |
| 3493 | IVGN-novel-miR_3493 | -0.24126394  | 7.10332476  | -1.182027778 |
| 3101 | hsa-miR-144*        | -0.241196384 | 3.664329612 | -1.181972429 |
| 3362 | IVGN-novel-miR_3362 | -0.240621408 | 4.969207435 | -1.181501456 |
| 3560 | IVGN-novel-miR_3560 | -0.239801453 | 12.47596664 | -1.180830142 |
| 3058 | hsa-miR-16-2*       | -0.237968669 | 5.542377447 | -1.17933098  |
| 2956 | hsa-miR-28-3p       | -0.226761445 | 7.21062577  | -1.170205127 |
| 2861 | hsa-miR-769-5p      | -0.221362698 | 4.255762926 | -1.165834256 |
| 3637 | IVGN-novel-miR_3637 | -0.214421649 | 2.957430684 | -1.160238702 |
| 2208 | hsa-miR-378*        | -0.208589794 | 4.622524557 | -1.155558097 |
| 3388 | IVGN-novel-miR_3388 | -0.208533538 | 11.62076616 | -1.155513038 |
| 3156 | hsa-miR-135a*       | -0.20779962  | 6.434150906 | -1.154925362 |
| 3302 | IVGN-novel-miR_3302 | -0.205472506 | 9.651321622 | -1.153063932 |
| 2904 | hsa-miR-21*         | -0.194852603 | 6.698547661 | -1.144607212 |
| 3456 | IVGN-novel-miR_3456 | -0.181767015 | 7.65066527  | -1.134272293 |
| 3378 | IVGN-novel-miR_3378 | -0.180525978 | 8.10914734  | -1.133296987 |
| 3274 | hsa-miR-155         | -0.180235757 | 6.830426035 | -1.13306903  |
| 2865 | hsa-miR-769-3p      | -0.17771378  | 4.352540787 | -1.131090041 |
| 2176 | hsa-miR-584         | -0.176423901 | 4.836193547 | -1.130079212 |
| 1362 | hsa-miR-148b        | -0.175173303 | 6.654159262 | -1.12910003  |
| 2282 | hsa-miR-30e         | -0.172710999 | 6.242904257 | -1.127174594 |
| 3367 | IVGN-novel-miR_3367 | -0.166434431 | 5.317925329 | -1.122281376 |
| 2182 | hsa-miR-92b         | -0.165554614 | 7.546963763 | -1.12159717  |
| 2271 | hsa-miR-585         | -0.165177813 | 3.93233718  | -1.121304271 |
| 3215 | hsa-miR-339-3p      | -0.156329273 | 5.021875416 | -1.114447977 |
| 2947 | hsa-miR-181a-2*     | -0.15245918  | 4.336354719 | -1.111462428 |
| 3157 | hsa-miR-183         | -0.151839199 | 8.857864173 | -1.110984893 |
| 2048 | hsa-miR-578         | -0.14600188  | 4.01524384  | -1.106498795 |
| 1952 | hsa-miR-200a*       | -0.13497115  | 4.713750957 | -1.098070855 |
| 3324 | IVGN-novel-miR_3324 | -0.133240836 | 8.740218072 | -1.09675466  |
| 1892 | hsa-miR-604         | -0.128469851 | 2.489344855 | -1.093133688 |

|      |                     |              |             |              |
|------|---------------------|--------------|-------------|--------------|
| 3042 | hsa-miR-191         | -0.123292927 | 8.726241203 | -1.089218149 |
| 2968 | hsa-miR-892b        | -0.12202524  | 2.854431904 | -1.088261481 |
| 3130 | hsa-miR-500         | -0.117692228 | 4.215421607 | -1.084997883 |
| 1894 | hsa-miR-658         | -0.117325089 | 3.381180459 | -1.084721807 |
| 2328 | hsa-miR-659         | -0.115312951 | 4.455179876 | -1.083209991 |
| 1082 | hsa-miR-324-3p      | -0.114841507 | 6.073004948 | -1.082856077 |
| 3538 | IVGN-novel-miR_3538 | -0.112979742 | 8.876880753 | -1.081459578 |
| 1924 | hsa-miR-374b        | -0.111511186 | 6.862472269 | -1.080359293 |
| 1913 | hsa-miR-644         | -0.111051614 | 5.486801353 | -1.080015198 |
| 1154 | hsa-miR-323-3p      | -0.106464346 | 4.460741638 | -1.076586579 |
| 2266 | hsa-miR-432*        | -0.103759375 | 3.828520423 | -1.074569932 |
| 3009 | hsa-miR-130b        | -0.103632877 | 8.890015874 | -1.074475716 |
| 1361 | hsa-miR-148a        | -0.100545679 | 6.86868432  | -1.072178923 |
| 3254 | hsa-miR-541         | -0.097718862 | 3.981291167 | -1.070080152 |
| 3304 | IVGN-novel-miR_3304 | -0.093281934 | 9.67701554  | -1.066794236 |
| 2903 | hsa-miR-362-3p      | -0.091870538 | 4.691128917 | -1.065751096 |
| 3054 | hsa-miR-301a        | -0.091756142 | 6.813015467 | -1.065666591 |
| 3601 | IVGN-novel-miR_3601 | -0.08986499  | 10.7119017  | -1.064270581 |
| 3429 | IVGN-novel-miR_3429 | -0.089482468 | 7.495224857 | -1.063988434 |
| 1068 | hsa-miR-99a         | -0.088989083 | 3.702098995 | -1.063624624 |
| 3644 | IVGN-novel-miR_3644 | -0.088509277 | 3.897086495 | -1.063270947 |
| 3303 | IVGN-novel-miR_3303 | -0.085665679 | 9.226709446 | -1.06117727  |
| 3022 | hsa-miR-421         | -0.082698463 | 6.1559663   | -1.058996971 |
| 1321 | hsa-miR-196b        | -0.082621097 | 5.817215548 | -1.058940183 |
| 1002 | hsa-miR-330-3p      | -0.081079762 | 10.6207591  | -1.057809445 |
| 3143 | hsa-miR-877         | -0.08085177  | 5.815556423 | -1.057642291 |
| 1139 | hsa-miR-25          | -0.080508007 | 9.678512483 | -1.057390307 |
| 3611 | IVGN-novel-miR_3611 | -0.075588003 | 6.183714843 | -1.053790445 |
| 1287 | hsa-miR-200a        | -0.069494795 | 9.416978897 | -1.049349156 |
| 3566 | IVGN-novel-miR_3566 | -0.068001882 | 12.73092388 | -1.048263843 |
| 2516 | hsa-miR-320         | -0.067536886 | 9.83418217  | -1.047926031 |
| 3083 | hsa-miR-17*         | -0.067219625 | 6.827430564 | -1.047695608 |
| 2750 | hsa-miR-455-5p      | -0.06636254  | 4.430704671 | -1.047073372 |
| 2005 | hsa-miR-130a        | -0.065682858 | 7.842601076 | -1.046580191 |
| 3404 | IVGN-novel-miR_3404 | -0.065363134 | 11.11432501 | -1.046348278 |
| 3068 | hsa-miR-15b*        | -0.062765441 | 2.55357978  | -1.044465936 |
| 2940 | hsa-miR-520g        | -0.062765441 | 2.55357978  | -1.044465936 |
| 2877 | hsa-miR-548c-5p     | -0.06184693  | 2.952617207 | -1.043801174 |
| 3572 | IVGN-novel-miR_3572 | -0.061167539 | 9.225550269 | -1.043309745 |
| 2231 | hsa-miR-493         | -0.056948507 | 4.832960134 | -1.040263137 |
| 3466 | IVGN-novel-miR_3466 | -0.055801984 | 10.82816686 | -1.039436758 |
| 3616 | IVGN-novel-miR_3616 | -0.051388498 | 10.99786058 | -1.036261777 |
| 3113 | hsa-miR-200c*       | -0.051353716 | 4.485995986 | -1.036236794 |
| 2733 | hsa-miR-29a         | -0.046176334 | 11.71433857 | -1.032524729 |
| 3048 | hsa-miR-220c        | -0.044910112 | 3.794888118 | -1.031618902 |
| 1199 | hsa-miR-151-3p      | -0.043240627 | 9.224938995 | -1.030425804 |
| 2288 | hsa-miR-431         | -0.038090593 | 4.514782097 | -1.026754018 |
| 3296 | hsa-miR-182         | -0.031154552 | 9.740119439 | -1.021829543 |
| 2909 | hsa-miR-181d        | -0.025213292 | 8.083250176 | -1.01763013  |
| 2989 | hsa-miR-940         | -0.021259026 | 2.542950267 | -1.014844739 |
| 2960 | hsa-miR-136         | -0.014145882 | 2.710518239 | -1.009853407 |
| 3210 | hsa-miR-192         | -0.009005987 | 5.173344022 | -1.006262    |
| 3297 | hsa-miR-96          | -0.008770046 | 5.562477419 | -1.006097447 |
| 2257 | hsa-miR-191*        | 0            | 4.488639962 | -1           |
| 2289 | hsa-miR-542-3p      | 0            | 2.52219706  | -1           |
| 2978 | hsa-miR-139-3p      | -2.22E-16    | 2.505591953 | -1           |
| 3649 | IVGN-novel-miR_3649 | 0.001762261  | 4.546467959 | 1.001222253  |

|      |                     |             |             |             |
|------|---------------------|-------------|-------------|-------------|
| 3084 | hsa-miR-29b-1*      | 0.010447174 | 7.334348634 | 1.007267712 |
| 3574 | IVGN-novel-miR_3574 | 0.014759189 | 6.943976855 | 1.010282798 |
| 3498 | IVGN-novel-miR_3498 | 0.015252692 | 6.228340637 | 1.010628445 |
| 3149 | hsa-miR-325         | 0.016945236 | 3.026233108 | 1.011814793 |
| 1251 | hsa-miR-30d         | 0.018663175 | 10.04919704 | 1.013020364 |
| 3244 | hsa-miR-647         | 0.025673067 | 4.477072292 | 1.017954492 |
| 2999 | hsa-miR-342-5p      | 0.026813005 | 3.918515106 | 1.018759142 |
| 3074 | hsa-let-7a*         | 0.028291764 | 4.921036478 | 1.019803903 |
| 1940 | hsa-miR-502-5p      | 0.028508811 | 4.29854222  | 1.019957339 |
| 3197 | hsa-miR-342-3p      | 0.031895344 | 6.856609021 | 1.022354364 |
| 2980 | hsa-miR-924         | 0.036889297 | 2.975875332 | 1.025899422 |
| 2908 | hsa-miR-181b        | 0.0369269   | 10.81709211 | 1.025926162 |
| 1088 | hsa-miR-221         | 0.040127641 | 10.9726018  | 1.028204792 |
| 3346 | IVGN-novel-miR_3346 | 0.041240674 | 12.91720625 | 1.028998354 |
| 2900 | hsa-miR-551b*       | 0.044905071 | 6.400441858 | 1.031615297 |
| 1878 | hsa-miR-138         | 0.046018799 | 5.198324284 | 1.032411988 |
| 1485 | hsa-miR-27a         | 0.046330764 | 11.35125737 | 1.032635259 |
| 1991 | hsa-miR-674         | 0.047836023 | 7.584038175 | 1.033713237 |
| 2064 | hsa-miR-590-5p      | 0.052583638 | 3.079887791 | 1.03712058  |
| 3427 | IVGN-novel-miR_3427 | 0.057101322 | 11.83368155 | 1.04037333  |
| 3211 | hsa-miR-345         | 0.061223586 | 6.47338189  | 1.043350277 |
| 1988 | hsa-miR-548b-3p     | 0.063643207 | 3.613007381 | 1.045101604 |
| 3674 | IVGN-novel-miR_3674 | 0.063761165 | 4.611131558 | 1.045187057 |
| 3237 | hsa-miR-31*         | 0.0655264   | 4.024248747 | 1.046466697 |
| 3249 | hsa-miR-939         | 0.067426939 | 5.493346684 | 1.047846172 |
| 1368 | hsa-miR-205         | 0.07978451  | 12.6935055  | 1.056860169 |
| 2062 | hsa-miR-617         | 0.080355186 | 4.39258279  | 1.057278307 |
| 3517 | IVGN-novel-miR_3517 | 0.084414018 | 11.70654291 | 1.060257007 |
| 3436 | IVGN-novel-miR_3436 | 0.085071447 | 8.670265392 | 1.060740272 |
| 3267 | hsa-miR-19a         | 0.085190518 | 6.117765432 | 1.060827822 |
| 2196 | hsa-miR-485-3p      | 0.086191186 | 3.060856083 | 1.061563878 |
| 3246 | hsa-miR-30c-1*      | 0.088171873 | 5.52303134  | 1.063022308 |
| 1392 | hsa-miR-149         | 0.088810042 | 7.50021676  | 1.063492635 |
| 3642 | IVGN-novel-miR_3642 | 0.090818975 | 4.375326422 | 1.064974565 |
| 3245 | hsa-miR-30c-2*      | 0.091088576 | 5.159169796 | 1.065173599 |
| 3165 | hsa-miR-138-2*      | 0.09749375  | 2.74068868  | 1.069913194 |
| 2132 | hsa-miR-200b        | 0.097613091 | 10.45746327 | 1.070001702 |
| 1312 | hsa-miR-15a         | 0.099445097 | 9.289014649 | 1.071361306 |
| 3180 | hsa-miR-770-5p      | 0.102788169 | 2.760958725 | 1.073846787 |
| 2985 | hsa-miR-423-3p      | 0.1071909   | 8.69520378  | 1.077128895 |
| 3376 | IVGN-novel-miR_3376 | 0.108923213 | 9.06434976  | 1.078423032 |
| 3216 | hsa-miR-423-5p      | 0.109969098 | 8.711489361 | 1.07920512  |
| 3053 | hsa-miR-16-1*       | 0.110377428 | 3.884471195 | 1.079510613 |
| 3289 | hsa-miR-768-5p      | 0.11181469  | 11.22512264 | 1.080586595 |
| 2113 | hsa-miR-599         | 0.11236152  | 4.849902583 | 1.080996251 |
| 3652 | IVGN-novel-miR_3652 | 0.113130432 | 7.311692847 | 1.081572542 |
| 1014 | hsa-miR-132         | 0.113474199 | 6.159528962 | 1.081830292 |
| 3269 | hsa-miR-147b        | 0.114857905 | 2.430392226 | 1.082868385 |
| 1804 | hsa-miR-648         | 0.114857905 | 2.430392226 | 1.082868385 |
| 3481 | IVGN-novel-miR_3481 | 0.114857905 | 2.430392226 | 1.082868385 |
| 3392 | IVGN-novel-miR_3392 | 0.120987952 | 6.537486172 | 1.087479309 |
| 3540 | IVGN-novel-miR_3540 | 0.121077477 | 6.196604277 | 1.087546794 |
| 2945 | hsa-miR-622         | 0.121558735 | 3.177302472 | 1.087909641 |
| 3208 | hsa-miR-183*        | 0.12182489  | 5.314536567 | 1.088110362 |
| 3548 | IVGN-novel-miR_3548 | 0.12454272  | 5.944635177 | 1.090162138 |
| 3266 | hsa-miR-19b         | 0.12697155  | 9.718814588 | 1.091999011 |
| 3455 | IVGN-novel-miR_3455 | 0.132628679 | 2.61989412  | 1.096289389 |



|      |                     |             |             |             |
|------|---------------------|-------------|-------------|-------------|
| 3357 | IVGN-novel-miR_3357 | 0.132893992 | 9.43000683  | 1.096491017 |
| 3127 | hsa-miR-302a        | 0.145953174 | 4.014815031 | 1.10646144  |
| 2278 | hsa-miR-654-5p      | 0.150479719 | 6.739165428 | 1.109938483 |
| 3094 | hsa-miR-509-3p      | 0.15061665  | 4.92197604  | 1.110043836 |
| 1879 | hsa-miR-626         | 0.156231065 | 4.594429252 | 1.114372117 |
| 3520 | IVGN-novel-miR_3520 | 0.158679624 | 5.28659577  | 1.116265048 |
| 3191 | hsa-miR-187         | 0.160365428 | 5.683740477 | 1.117570178 |
| 1183 | hsa-miR-331-3p      | 0.16041279  | 6.070883327 | 1.117606867 |
| 3613 | IVGN-novel-miR_3613 | 0.16391772  | 8.489636997 | 1.120325318 |
| 3114 | hsa-miR-33a         | 0.169345794 | 4.382241989 | 1.12454843  |
| 3038 | hsa-miR-424*        | 0.16976928  | 3.081723316 | 1.124878576 |
| 3679 | IVGN-novel-miR_3679 | 0.173823142 | 9.278330587 | 1.128043844 |
| 3125 | hsa-miR-302d        | 0.17525236  | 4.11278569  | 1.129161903 |
| 2281 | hsa-miR-30c         | 0.175368902 | 8.050704113 | 1.129253122 |
| 1458 | hsa-miR-299-5p      | 0.176909367 | 4.058729589 | 1.130459547 |
| 3142 | hsa-miR-890         | 0.178099593 | 3.695878008 | 1.131392563 |
| 3502 | IVGN-novel-miR_3502 | 0.178208384 | 13.27536669 | 1.131477883 |
| 3463 | IVGN-novel-miR_3463 | 0.183312971 | 12.59708035 | 1.135488402 |
| 3181 | hsa-miR-532-3p      | 0.184276394 | 5.2518825   | 1.136246928 |
| 3310 | IVGN-novel-miR_3310 | 0.186128818 | 12.9125802  | 1.137706809 |
| 2134 | hsa-miR-429         | 0.187450972 | 6.090624985 | 1.138749935 |
| 3442 | IVGN-novel-miR_3442 | 0.190171942 | 5.485045873 | 1.140899681 |
| 3306 | IVGN-novel-miR_3306 | 0.197320902 | 12.72188295 | 1.146567191 |
| 3176 | hsa-miR-222*        | 0.198249971 | 3.856861608 | 1.147305797 |
| 2088 | hsa-miR-601         | 0.198494668 | 6.337671287 | 1.147500409 |
| 3214 | hsa-miR-143         | 0.200933152 | 4.704059758 | 1.149441587 |
| 3639 | IVGN-novel-miR_3639 | 0.201416756 | 8.346283878 | 1.149826954 |
| 3696 | IVGN-novel-miR_3696 | 0.202999458 | 4.081175131 | 1.151089059 |
| 2943 | hsa-miR-125a-3p     | 0.203683571 | 4.068188613 | 1.151635025 |
| 3039 | hsa-miR-93          | 0.208311081 | 9.801303206 | 1.155334877 |
| 3248 | hsa-miR-612         | 0.208474992 | 4.689369525 | 1.155466147 |
| 3355 | IVGN-novel-miR_3355 | 0.211104775 | 12.91091834 | 1.157574282 |
| 3282 | hsa-miR-579         | 0.213266569 | 4.382006677 | 1.15931014  |
| 3506 | IVGN-novel-miR_3506 | 0.214591022 | 11.60098375 | 1.160374922 |
| 3108 | hsa-miR-193b*       | 0.215524829 | 5.075103696 | 1.161126236 |
| 2898 | hsa-miR-520d-3p     | 0.216297813 | 4.966233638 | 1.161748525 |
| 1910 | hsa-miR-512-3p      | 0.216596645 | 4.517638597 | 1.161989188 |
| 2841 | hsa-miR-766         | 0.222865287 | 8.50644723  | 1.167049123 |
| 3203 | hsa-miR-432         | 0.226030061 | 6.483193792 | 1.169612035 |
| 3512 | IVGN-novel-miR_3512 | 0.229577096 | 8.231198229 | 1.172491201 |
| 3097 | hsa-miR-455-3p      | 0.231246554 | 10.04392276 | 1.17384877  |
| 2267 | hsa-miR-449a        | 0.232036473 | 6.203805552 | 1.174491664 |
| 3459 | IVGN-novel-miR_3459 | 0.233271414 | 12.00806704 | 1.175497454 |
| 3488 | IVGN-novel-miR_3488 | 0.235479305 | 13.23471915 | 1.177297805 |
| 3675 | IVGN-novel-miR_3675 | 0.236405748 | 5.281675664 | 1.178054062 |
| 3411 | IVGN-novel-miR_3411 | 0.237554971 | 12.6714661  | 1.178992852 |
| 3647 | IVGN-novel-miR_3647 | 0.239285255 | 13.68918502 | 1.180407715 |
| 3066 | hsa-miR-875-3p      | 0.239544956 | 3.423958943 | 1.18062022  |
| 2939 | hsa-miR-33a*        | 0.239544956 | 2.913191762 | 1.18062022  |
| 3145 | hsa-miR-29b         | 0.245915233 | 7.218953647 | 1.185844822 |
| 3377 | IVGN-novel-miR_3377 | 0.248539135 | 5.213787706 | 1.18800354  |
| 3682 | IVGN-novel-miR_3682 | 0.251273665 | 13.31496939 | 1.190257455 |
| 1880 | hsa-miR-671-5p      | 0.253174442 | 4.323014141 | 1.191826674 |
| 1442 | hsa-miR-24-1*       | 0.254781913 | 4.5698388   | 1.193155365 |
| 2125 | hsa-miR-18b         | 0.256702676 | 8.237767606 | 1.194744955 |
| 3683 | IVGN-novel-miR_3683 | 0.265092753 | 3.973220019 | 1.201713307 |
| 3241 | hsa-miR-122         | 0.268115005 | 7.734974535 | 1.204233373 |

|      |                           |             |             |             |
|------|---------------------------|-------------|-------------|-------------|
| 3557 | IVGN-novel-miR_3557       | 0.26869119  | 10.21606439 | 1.204714417 |
| 1911 | hsa-miR-491-5p            | 0.271222224 | 2.657808172 | 1.206829798 |
| 2902 | hsa-miR-338-5p            | 0.273827772 | 4.127457144 | 1.209011336 |
| 3221 | hsa-miR-508-3p            | 0.277199136 | 4.716008623 | 1.21183992  |
| 3240 | hsa-miR-206               | 0.277933312 | 8.141835891 | 1.212456772 |
| 2915 | hsa-miR-193b              | 0.279122404 | 8.052431752 | 1.21345651  |
| 3424 | IVGN-novel-miR_3424       | 0.280203776 | 11.498387   | 1.214366397 |
| 3044 | hsa-miR-195*              | 0.28269894  | 5.833687723 | 1.216468481 |
| 3503 | IVGN-novel-miR_3503       | 0.287684218 | 13.29545128 | 1.220679297 |
| 3055 | hsa-miR-301b              | 0.29248125  | 2.307204673 | 1.224744871 |
| 3132 | hsa-miR-524-5p            | 0.29248125  | 2.307204673 | 1.224744871 |
| 3273 | hsa-miR-744*              | 0.29248125  | 2.307204673 | 1.224744871 |
| 3530 | IVGN-novel-miR_3530       | 0.29248125  | 2.307204673 | 1.224744871 |
| 2810 | hsa-miR-193a-5p           | 0.2929396   | 5.385455838 | 1.225134039 |
| 3446 | IVGN-novel-miR_3446       | 0.293324228 | 7.290424    | 1.225460708 |
| 3253 | hsa-miR-675               | 0.294042499 | 5.309877912 | 1.226070977 |
| 2239 | hsa-miR-610               | 0.296219549 | 5.73021296  | 1.227922534 |
| 3475 | IVGN-novel-miR_3475       | 0.299420512 | 12.67419576 | 1.230649999 |
| 3231 | hsa-miR-146b-3p           | 0.312646827 | 3.890422208 | 1.241984206 |
| 2757 | hsa-miR-128a;hsa-miR-128b | 0.313093497 | 5.865892372 | 1.242368794 |
| 3057 | hsa-miR-490-5p            | 0.315758601 | 2.770682079 | 1.244665955 |
| 3002 | hsa-miR-431*              | 0.316744054 | 2.947807582 | 1.245516431 |
| 3265 | hsa-miR-134               | 0.318171057 | 2.762608214 | 1.246749009 |
| 3285 | hsa-miR-519e*             | 0.322245208 | 4.426279972 | 1.250274788 |
| 3075 | hsa-let-7f-1*             | 0.328022799 | 2.686208459 | 1.255291829 |
| 1771 | hsa-miR-520a-3p           | 0.328022799 | 2.686208459 | 1.255291829 |
| 3172 | hsa-miR-483-3p            | 0.332392522 | 6.609889854 | 1.259099697 |
| 3412 | IVGN-novel-miR_3412       | 0.33277616  | 13.58666859 | 1.259434558 |
| 2594 | hsa-miR-222               | 0.333275665 | 10.21128246 | 1.259870688 |
| 2249 | hsa-miR-571               | 0.337787983 | 5.184459891 | 1.263817355 |
| 3063 | hsa-miR-125a-5p           | 0.339838266 | 8.733103448 | 1.265614704 |
| 3413 | IVGN-novel-miR_3413       | 0.34198246  | 12.97058409 | 1.267497112 |
| 3112 | hsa-miR-934               | 0.344627906 | 2.785116731 | 1.269823432 |
| 3051 | hsa-miR-589*              | 0.344627906 | 2.677905906 | 1.269823432 |
| 3233 | hsa-miR-214*              | 0.34525355  | 4.915464877 | 1.270374228 |
| 1850 | hsa-miR-18a*              | 0.346697383 | 6.018373952 | 1.27164624  |
| 3627 | IVGN-novel-miR_3627       | 0.350140942 | 12.44414103 | 1.274685149 |
| 3680 | IVGN-novel-miR_3680       | 0.351749175 | 10.05059538 | 1.276106888 |
| 1990 | hsa-miR-603               | 0.352243008 | 3.957965725 | 1.276543772 |
| 3563 | IVGN-novel-miR_3563       | 0.353804886 | 8.031039674 | 1.277926521 |
| 2108 | hsa-miR-632               | 0.354951952 | 5.665561781 | 1.278942987 |
| 3361 | IVGN-novel-miR_3361       | 0.355997196 | 4.467318525 | 1.279869926 |
| 2954 | hsa-miR-105*              | 0.361579897 | 4.16942991  | 1.284832149 |
| 3238 | hsa-miR-370               | 0.361692077 | 6.54317869  | 1.284932058 |
| 2240 | hsa-miR-558               | 0.361864744 | 3.143869632 | 1.285085852 |
| 2083 | hsa-miR-449b              | 0.362089503 | 6.140159733 | 1.285286073 |
| 1487 | hsa-miR-197               | 0.362584848 | 6.393697019 | 1.285727448 |
| 2998 | hsa-miR-625               | 0.364554933 | 8.73115184  | 1.287484383 |
| 1247 | hsa-miR-34a               | 0.364633408 | 7.723440727 | 1.287554418 |
| 3504 | IVGN-novel-miR_3504       | 0.367979769 | 12.98705209 | 1.290544393 |
| 3013 | hsa-miR-194*              | 0.376980041 | 5.790061    | 1.298620637 |
| 3402 | IVGN-novel-miR_3402       | 0.37776803  | 9.923689262 | 1.299330127 |
| 3487 | IVGN-novel-miR_3487       | 0.383005799 | 12.66685113 | 1.304055977 |
| 2080 | hsa-miR-539               | 0.385022766 | 6.677557036 | 1.305880394 |
| 3384 | IVGN-novel-miR_3384       | 0.385455235 | 12.50795515 | 1.306271909 |
| 2936 | hsa-miR-425               | 0.386088543 | 8.089842441 | 1.306845456 |
| 2979 | hsa-miR-27b*              | 0.387216654 | 6.77819194  | 1.307867741 |

|      |                     |             |             |             |
|------|---------------------|-------------|-------------|-------------|
| 3505 | IVGN-novel-miR_3505 | 0.387254524 | 11.42870375 | 1.307902072 |
| 3263 | hsa-miR-346         | 0.388632441 | 4.160603694 | 1.309151844 |
| 2191 | hsa-miR-484         | 0.39132672  | 7.637237466 | 1.311599012 |
| 3698 | IVGN-novel-miR_3698 | 0.395158679 | 13.18569885 | 1.315087396 |
| 3232 | hsa-miR-661         | 0.396076188 | 5.704366511 | 1.315924017 |
| 1179 | hsa-miR-181a*       | 0.401547474 | 5.488006377 | 1.32092401  |
| 3403 | IVGN-novel-miR_3403 | 0.41360756  | 9.887264301 | 1.332012443 |
| 1282 | hsa-miR-106b        | 0.414436533 | 10.66848098 | 1.332778038 |
| 3322 | IVGN-novel-miR_3322 | 0.416012936 | 12.65637104 | 1.334235133 |
| 3418 | IVGN-novel-miR_3418 | 0.416324476 | 4.936897632 | 1.334523283 |
| 2921 | hsa-miR-99b*        | 0.417041042 | 6.945741874 | 1.335186287 |
| 3551 | IVGN-novel-miR_3551 | 0.421216723 | 13.32890604 | 1.339056396 |
| 3298 | hsa-miR-450b-5p     | 0.423998453 | 3.457925775 | 1.341640786 |
| 3175 | hsa-miR-545*        | 0.423998453 | 3.457925775 | 1.341640786 |
| 3553 | IVGN-novel-miR_3553 | 0.424101063 | 12.40838852 | 1.341736213 |
| 2996 | hsa-miR-27a*        | 0.426260447 | 6.522176962 | 1.343745988 |
| 3423 | IVGN-novel-miR_3423 | 0.428559266 | 10.74531503 | 1.345888846 |
| 3654 | IVGN-novel-miR_3654 | 0.435037636 | 7.002679468 | 1.351946101 |
| 3457 | IVGN-novel-miR_3457 | 0.43647896  | 12.32712154 | 1.353297437 |
| 3099 | hsa-miR-24-2*       | 0.436511682 | 6.339956061 | 1.353328132 |
| 3360 | IVGN-novel-miR_3360 | 0.437234559 | 2.30357978  | 1.354006401 |
| 3406 | IVGN-novel-miR_3406 | 0.437234559 | 2.30357978  | 1.354006401 |
| 3026 | hsa-miR-188-5p      | 0.438852387 | 6.298530594 | 1.355525626 |
| 3300 | hsa-miR-129-5p      | 0.441575384 | 6.530517736 | 1.358086512 |
| 3666 | IVGN-novel-miR_3666 | 0.441829746 | 10.92407156 | 1.358325978 |
| 3609 | IVGN-novel-miR_3609 | 0.442558638 | 4.014266625 | 1.359012417 |
| 3669 | IVGN-novel-miR_3669 | 0.443837355 | 12.95035294 | 1.360217497 |
| 3691 | IVGN-novel-miR_3691 | 0.446191641 | 12.87761197 | 1.362439003 |
| 3236 | hsa-miR-744         | 0.44866255  | 6.736372963 | 1.364774457 |
| 2922 | hsa-miR-28-5p       | 0.450664732 | 7.838493263 | 1.366669814 |
| 2884 | hsa-miR-641         | 0.451845096 | 5.202245818 | 1.367788434 |
| 1865 | hsa-miR-383         | 0.452620424 | 6.184526452 | 1.368523704 |
| 3385 | IVGN-novel-miR_3385 | 0.455272013 | 12.30973061 | 1.371041284 |
| 3118 | hsa-miR-23a*        | 0.455463082 | 5.081319855 | 1.371222875 |
| 2864 | hsa-miR-765         | 0.456880248 | 9.866034817 | 1.372570496 |
| 3198 | hsa-miR-518c*       | 0.458456783 | 2.564190892 | 1.37407122  |
| 1063 | hsa-miR-99b         | 0.459316091 | 8.203547107 | 1.374889897 |
| 3166 | hsa-miR-105         | 0.459831983 | 3.382780254 | 1.375381632 |
| 3386 | IVGN-novel-miR_3386 | 0.462244336 | 12.34799825 | 1.377683353 |
| 3110 | hsa-miR-616         | 0.47938446  | 3.155136754 | 1.394148712 |
| 2977 | hsa-miR-219-2-3p    | 0.480128093 | 5.856865246 | 1.394867508 |
| 3333 | IVGN-novel-miR_3333 | 0.481310715 | 3.872081067 | 1.396011392 |
| 3255 | hsa-miR-876-3p      | 0.481407098 | 5.516030571 | 1.39610466  |
| 1377 | hsa-miR-127-3p      | 0.489068133 | 6.310800653 | 1.403538009 |
| 3550 | IVGN-novel-miR_3550 | 0.489955878 | 13.09052006 | 1.404401924 |
| 2280 | hsa-miR-30b         | 0.491604995 | 10.42983196 | 1.406008187 |
| 3199 | hsa-miR-330-5p      | 0.499081109 | 4.396724828 | 1.413313099 |
| 3391 | IVGN-novel-miR_3391 | 0.499779359 | 13.02279377 | 1.413997294 |
| 3179 | hsa-miR-198         | 0.500656167 | 3.95461719  | 1.414856922 |
| 3188 | hsa-miR-877*        | 0.501978386 | 7.71556681  | 1.416154222 |
| 3407 | IVGN-novel-miR_3407 | 0.504071156 | 12.50735183 | 1.418209983 |
| 3483 | IVGN-novel-miR_3483 | 0.506949221 | 5.342091313 | 1.421042025 |
| 3491 | IVGN-novel-miR_3491 | 0.507220183 | 4.818372373 | 1.421308946 |
| 3299 | hsa-miR-335*        | 0.507607111 | 3.331992392 | 1.421690189 |
| 3252 | hsa-miR-379         | 0.509886743 | 3.289649098 | 1.423938407 |
| 3219 | hsa-miR-574-5p      | 0.511953521 | 11.40395471 | 1.425979776 |
| 3501 | IVGN-novel-miR_3501 | 0.516227425 | 7.392388686 | 1.430210425 |

|      |                     |             |             |             |
|------|---------------------|-------------|-------------|-------------|
| 3514 | IVGN-novel-miR_3514 | 0.517205835 | 12.3915374  | 1.431180698 |
| 3218 | hsa-miR-672         | 0.517605164 | 9.386677912 | 1.431576895 |
| 3425 | IVGN-novel-miR_3425 | 0.518058527 | 11.16191387 | 1.432026835 |
| 3015 | hsa-miR-101*        | 0.518102124 | 4.025236753 | 1.432070109 |
| 1863 | hsa-miR-485-5p      | 0.519175132 | 6.81572649  | 1.433135612 |
| 3607 | IVGN-novel-miR_3607 | 0.520598378 | 13.16679425 | 1.434550124 |
| 3293 | hsa-miR-30d*        | 0.522761067 | 3.446878735 | 1.436702217 |
| 3419 | IVGN-novel-miR_3419 | 0.523821988 | 11.74691354 | 1.437759119 |
| 3317 | IVGN-novel-miR_3317 | 0.525119332 | 9.903256281 | 1.439052605 |
| 3573 | IVGN-novel-miR_3573 | 0.528407336 | 12.89438607 | 1.442336048 |
| 3135 | hsa-miR-140-3p      | 0.528683049 | 4.894172905 | 1.44261172  |
| 3115 | hsa-miR-92a-2*      | 0.53450741  | 3.292858904 | 1.448447516 |
| 3556 | IVGN-novel-miR_3556 | 0.538079715 | 6.982217777 | 1.452038509 |
| 2967 | hsa-miR-422a        | 0.538492406 | 2.471632723 | 1.452453932 |
| 3336 | IVGN-novel-miR_3336 | 0.539001256 | 3.515427176 | 1.452966315 |
| 3256 | hsa-miR-29b-2*      | 0.540309507 | 6.749679355 | 1.454284477 |
| 3247 | hsa-miR-30b*        | 0.55926575  | 7.292980698 | 1.473519089 |
| 3547 | IVGN-novel-miR_3547 | 0.559925209 | 4.122250006 | 1.474192792 |
| 3147 | hsa-miR-331-5p      | 0.562262304 | 4.32648914  | 1.476582846 |
| 3476 | IVGN-novel-miR_3476 | 0.562404975 | 7.275443715 | 1.476728876 |
| 3645 | IVGN-novel-miR_3645 | 0.5628855   | 4.489371958 | 1.477220818 |
| 3390 | IVGN-novel-miR_3390 | 0.565044922 | 12.76136018 | 1.479433574 |
| 3045 | hsa-miR-32*         | 0.567939438 | 8.002629392 | 1.48240478  |
| 3195 | hsa-miR-517*        | 0.570536375 | 3.998508712 | 1.485075599 |
| 1784 | hsa-miR-490-3p      | 0.570551819 | 3.943120266 | 1.485091497 |
| 3500 | IVGN-novel-miR_3500 | 0.576517362 | 9.801548621 | 1.491245063 |
| 3582 | IVGN-novel-miR_3582 | 0.576844838 | 11.77066192 | 1.491583598 |
| 3399 | IVGN-novel-miR_3399 | 0.580639453 | 12.49151081 | 1.495511965 |
| 3271 | hsa-miR-147         | 0.586390169 | 4.202311841 | 1.501485112 |
| 3000 | hsa-miR-608         | 0.592457918 | 8.306829159 | 1.50781342  |
| 2997 | hsa-miR-185*        | 0.592665317 | 7.49257305  | 1.508030196 |
| 3410 | IVGN-novel-miR_3410 | 0.593889011 | 11.7887362  | 1.50930985  |
| 3531 | IVGN-novel-miR_3531 | 0.593934081 | 12.48153164 | 1.509357002 |
| 3510 | IVGN-novel-miR_3510 | 0.600064498 | 5.262727065 | 1.515784331 |
| 3681 | IVGN-novel-miR_3681 | 0.605832095 | 10.6169397  | 1.521856252 |
| 3469 | IVGN-novel-miR_3469 | 0.605918609 | 10.00117139 | 1.521947516 |
| 2930 | hsa-miR-382         | 0.612010627 | 7.014107585 | 1.528387779 |
| 1995 | hsa-miR-497         | 0.614044868 | 5.818164371 | 1.53054437  |
| 3397 | IVGN-novel-miR_3397 | 0.616692132 | 12.55815443 | 1.53335541  |
| 3001 | hsa-miR-296-3p      | 0.617384709 | 8.373396245 | 1.534091686 |
| 2917 | hsa-miR-483-5p      | 0.618578583 | 9.309217867 | 1.535361719 |
| 3570 | IVGN-novel-miR_3570 | 0.618979867 | 11.78718711 | 1.535788837 |
| 2221 | hsa-miR-645         | 0.619960066 | 6.413485252 | 1.536832641 |
| 2919 | hsa-miR-129*        | 0.621727018 | 3.85459493  | 1.538716042 |
| 3539 | IVGN-novel-miR_3539 | 0.621837326 | 5.170501981 | 1.538833697 |
| 1805 | hsa-miR-595         | 0.622583998 | 9.430530469 | 1.539630332 |
| 3078 | hsa-miR-452*        | 0.623931929 | 7.558324506 | 1.541069502 |
| 3375 | IVGN-novel-miR_3375 | 0.625308907 | 3.469189767 | 1.542541076 |
| 2941 | hsa-miR-602         | 0.643727209 | 2.364344855 | 1.562360315 |
| 1993 | hsa-miR-424         | 0.65308869  | 7.286594536 | 1.572531253 |
| 3630 | IVGN-novel-miR_3630 | 0.65798334  | 8.019323663 | 1.577875461 |
| 1959 | hsa-miR-532-5p      | 0.659426186 | 4.852190378 | 1.579454291 |
| 3670 | IVGN-novel-miR_3670 | 0.661355351 | 13.47511711 | 1.581567742 |
| 3353 | IVGN-novel-miR_3353 | 0.662429647 | 11.43284147 | 1.582745888 |
| 3389 | IVGN-novel-miR_3389 | 0.663241433 | 6.390821486 | 1.583636729 |
| 3697 | IVGN-novel-miR_3697 | 0.668133393 | 12.19744988 | 1.589015716 |
| 3447 | IVGN-novel-miR_3447 | 0.679579281 | 11.07203539 | 1.601672607 |

|      |                                                                                       |             |             |             |
|------|---------------------------------------------------------------------------------------|-------------|-------------|-------------|
| 3091 | hsa-miR-202                                                                           | 0.681540167 | 4.205740231 | 1.603851052 |
| 1884 | hsa-miR-564                                                                           | 0.682069858 | 4.077886847 | 1.604440021 |
| 3251 | hsa-miR-150*                                                                          | 0.689255812 | 2.505591953 | 1.61245155  |
| 2932 | hsa-miR-34b                                                                           | 0.689255812 | 2.505591953 | 1.61245155  |
| 3561 | IVGN-novel-miR_3561                                                                   | 0.689967412 | 5.058946353 | 1.613247078 |
| 3651 | IVGN-novel-miR_3651                                                                   | 0.69953286  | 5.199919159 | 1.623978868 |
| 3543 | IVGN-novel-miR_3543                                                                   | 0.702563964 | 9.460267224 | 1.627394437 |
| 3141 | hsa-miR-138-1*                                                                        | 0.704467351 | 7.860750911 | 1.629542919 |
| 3529 | IVGN-novel-miR_3529                                                                   | 0.704682686 | 3.976471558 | 1.629786162 |
| 3171 | hsa-miR-768-3p                                                                        | 0.704719484 | 11.13711726 | 1.629827732 |
| 3330 | IVGN-novel-miR_3330                                                                   | 0.709059579 | 13.09206177 | 1.634738165 |
| 3673 | IVGN-novel-miR_3673                                                                   | 0.712412935 | 13.1976179  | 1.63854232  |
| 3011 | hsa-miR-550                                                                           | 0.715793686 | 3.554936701 | 1.642386513 |
| 3460 | IVGN-novel-miR_3460                                                                   | 0.717510066 | 11.52109258 | 1.64434163  |
| 3415 | IVGN-novel-miR_3415                                                                   | 0.718140586 | 12.03202878 | 1.645060435 |
| 3632 | IVGN-novel-miR_3632                                                                   | 0.723380812 | 10.02954851 | 1.651046567 |
| 3194 | hsa-miR-522*;hsa-miR-519a*;hsa-miR-519c-5p;hsa-miR-519b-5p;hsa-miR-523*;hsa-miR-518e* | 0.723729488 | 2.884061804 | 1.651445648 |
| 3400 | IVGN-novel-miR_3400                                                                   | 0.724665058 | 4.764683414 | 1.652516937 |
| 3186 | hsa-miR-671-3p                                                                        | 0.73064144  | 3.851848377 | 1.659376707 |
| 1782 | hsa-miR-634                                                                           | 0.733672888 | 5.507536932 | 1.662867121 |
| 3562 | IVGN-novel-miR_3562                                                                   | 0.743509502 | 4.920077094 | 1.674243657 |
| 2885 | hsa-miR-583                                                                           | 0.745227336 | 4.560443308 | 1.676238386 |
| 3134 | hsa-miR-187*                                                                          | 0.746338306 | 2.860990332 | 1.677529697 |
| 3593 | IVGN-novel-miR_3593                                                                   | 0.749827478 | 10.9249212  | 1.681591729 |
| 2946 | hsa-miR-220b                                                                          | 0.750916897 | 6.051060123 | 1.682862024 |
| 2931 | hsa-miR-34c-3p                                                                        | 0.752644657 | 2.729857281 | 1.684878614 |
| 3351 | IVGN-novel-miR_3351                                                                   | 0.753866323 | 11.91441381 | 1.686305964 |
| 2911 | hsa-miR-122*                                                                          | 0.761780978 | 3.78456795  | 1.695582496 |
| 1052 | hsa-miR-367                                                                           | 0.765257358 | 2.46759118  | 1.699673171 |
| 3325 | IVGN-novel-miR_3325                                                                   | 0.765293133 | 3.751015687 | 1.699715319 |
| 3401 | IVGN-novel-miR_3401                                                                   | 0.765505432 | 12.26905635 | 1.699965458 |
| 3342 | IVGN-novel-miR_3342                                                                   | 0.766737149 | 9.829458919 | 1.701417442 |
| 2948 | hsa-miR-665                                                                           | 0.767413337 | 4.861945774 | 1.702215079 |
| 3207 | hsa-miR-573                                                                           | 0.767989606 | 3.528838741 | 1.702895147 |
| 3508 | IVGN-novel-miR_3508                                                                   | 0.769454969 | 10.66808044 | 1.704625677 |
| 3106 | hsa-miR-23b*                                                                          | 0.770588445 | 7.185292573 | 1.705965469 |
| 3672 | IVGN-novel-miR_3672                                                                   | 0.775469736 | 12.42748713 | 1.711747298 |
| 3440 | IVGN-novel-miR_3440                                                                   | 0.775912238 | 6.879304661 | 1.712272405 |
| 3381 | IVGN-novel-miR_3381                                                                   | 0.77760491  | 6.61811656  | 1.714282543 |
| 3073 | hsa-miR-921                                                                           | 0.777716845 | 6.841799436 | 1.714415555 |
| 3631 | IVGN-novel-miR_3631                                                                   | 0.78599143  | 9.350765095 | 1.724276848 |
| 3473 | IVGN-novel-miR_3473                                                                   | 0.791592917 | 8.106083559 | 1.730984633 |
| 3528 | IVGN-novel-miR_3528                                                                   | 0.798748779 | 8.284894537 | 1.739591758 |
| 1242 | hsa-miR-184                                                                           | 0.809249849 | 5.62480841  | 1.752300071 |
| 3490 | IVGN-novel-miR_3490                                                                   | 0.826798625 | 12.85996288 | 1.773745009 |
| 2955 | hsa-miR-125b-1*                                                                       | 0.833145324 | 7.723219181 | 1.781565251 |
| 2881 | hsa-miR-543                                                                           | 0.835135943 | 2.630505232 | 1.784025137 |
| 3628 | IVGN-novel-miR_3628                                                                   | 0.83676983  | 7.31529334  | 1.786046733 |
| 3480 | IVGN-novel-miR_3480                                                                   | 0.83738373  | 13.26993321 | 1.786806899 |
| 2180 | hsa-miR-299-3p                                                                        | 0.849725193 | 3.209224633 | 1.802157614 |
| 3523 | IVGN-novel-miR_3523                                                                   | 0.855477307 | 14.18616735 | 1.809357272 |
| 3581 | IVGN-novel-miR_3581                                                                   | 0.859820418 | 3.263184832 | 1.814812394 |
| 3688 | IVGN-novel-miR_3688                                                                   | 0.869129873 | 2.803516903 | 1.826560921 |
| 3694 | IVGN-novel-miR_3694                                                                   | 0.870046107 | 5.947658442 | 1.827721312 |
| 2958 | hsa-miR-371-5p                                                                        | 0.873468066 | 3.740920498 | 1.832061668 |

|      |                     |             |             |             |
|------|---------------------|-------------|-------------|-------------|
| 3509 | IVGN-novel-miR_3509 | 0.8783559   | 12.63609961 | 1.838279199 |
| 3568 | IVGN-novel-miR_3462 | 0.885836071 | 13.62490861 | 1.847835169 |
| 3320 | IVGN-novel-miR_3568 | 0.898542999 | 12.58916432 | 1.864182364 |
| 3072 | IVGN-novel-miR_3320 | 0.908121809 | 12.79557313 | 1.876600831 |
| 3323 | hsa-miR-621         | 0.911993075 | 3.418933798 | 1.881643182 |
| 2560 | IVGN-novel-miR_3323 | 0.913070488 | 5.611503605 | 1.88304893  |
| 3458 | hsa-miR-214         | 0.91416682  | 8.429210878 | 1.884480439 |
| 3102 | IVGN-novel-miR_3458 | 0.919253875 | 11.96088652 | 1.891136993 |
| 3565 | hsa-miR-145*        | 0.923441643 | 4.950360783 | 1.896634446 |
| 3105 | IVGN-novel-miR_3565 | 0.924316193 | 13.29829013 | 1.897784519 |
| 3438 | hsa-miR-486-3p      | 0.952374253 | 2.69042083  | 1.935054571 |
| 3624 | IVGN-novel-miR_3438 | 0.961245035 | 12.13972288 | 1.946989408 |
| 3394 | IVGN-novel-miR_3624 | 0.962223827 | 8.521185589 | 1.948310784 |
| 2230 | IVGN-novel-miR_3394 | 0.975628546 | 11.47848779 | 1.966497764 |
| 2059 | hsa-miR-494         | 0.98642424  | 9.161052596 | 1.981268272 |
| 1817 | hsa-miR-29c*        | 0.991214806 | 6.265186808 | 1.98785814  |
| 2976 | hsa-miR-487b        | 1.000288828 | 2.837205716 | 2.000400441 |
| 3629 | hsa-miR-302d*       | 1.02186571  | 2.883896129 | 2.030543185 |
| 1756 | IVGN-novel-miR_3629 | 1.031411669 | 12.10867243 | 2.044023339 |
| 3162 | hsa-miR-649         | 1.038803437 | 3.741768958 | 2.054522937 |
| 2993 | hsa-miR-654-3p      | 1.042211956 | 3.414808947 | 2.059382702 |
| 3450 | hsa-miR-92b*        | 1.051696022 | 6.307632845 | 2.072965379 |
| 3047 | IVGN-novel-miR_3450 | 1.056833232 | 12.66310061 | 2.080360041 |
| 3441 | hsa-miR-220         | 1.057738609 | 2.321350555 | 2.081665999 |
| 3315 | IVGN-novel-miR_3441 | 1.066411961 | 6.584832272 | 2.094218482 |
| 3677 | IVGN-novel-miR_3315 | 1.081343531 | 4.708777852 | 2.116005725 |
| 3689 | IVGN-novel-miR_3677 | 1.088785698 | 12.45086969 | 2.126949379 |
| 3485 | IVGN-novel-miR_3689 | 1.103004647 | 9.625557857 | 2.148015862 |
| 1871 | IVGN-novel-miR_3485 | 1.104713398 | 7.973567313 | 2.150561514 |
| 3486 | hsa-miR-575         | 1.110535237 | 5.285963376 | 2.159257405 |
| 3596 | IVGN-novel-miR_3486 | 1.125384702 | 6.097570034 | 2.181597122 |
| 3462 | IVGN-novel-miR_3596 | 1.150849688 | 7.455600925 | 2.220446311 |
| 1891 | hsa-miR-663         | 1.181753089 | 4.670812213 | 2.268522689 |
| 3461 | IVGN-novel-miR_3461 | 1.182462718 | 3.300795999 | 2.269638798 |
| 1775 | hsa-miR-216b        | 1.185797241 | 3.426173243 | 2.274890716 |
| 1182 | hsa-miR-125b        | 1.193938645 | 9.685315971 | 2.28776465  |
| 3494 | IVGN-novel-miR_3494 | 1.198850915 | 12.79764887 | 2.295567597 |
| 3474 | IVGN-novel-miR_3474 | 1.199993848 | 2.44807628  | 2.297386913 |
| 2994 | hsa-miR-149*        | 1.209941878 | 9.300666875 | 2.31328317  |
| 1820 | hsa-miR-409-3p      | 1.210833504 | 3.099112257 | 2.314713287 |
| 1169 | hsa-miR-142-5p      | 1.213817141 | 4.629012777 | 2.319505297 |
| 3334 | IVGN-novel-miR_3334 | 1.218219904 | 4.959329811 | 2.326594689 |
| 3448 | IVGN-novel-miR_3448 | 1.229523916 | 12.1263461  | 2.344895965 |
| 1933 | hsa-miR-376a        | 1.235622734 | 3.270271174 | 2.354829709 |
| 3398 | IVGN-novel-miR_3398 | 1.242409153 | 3.654168816 | 2.365932891 |
| 2982 | hsa-miR-298         | 1.259340132 | 2.964632567 | 2.39386224  |
| 3393 | IVGN-novel-miR_3393 | 1.259796951 | 12.22417919 | 2.394620359 |
| 3301 | IVGN-novel-miR_3301 | 1.263219323 | 2.713585178 | 2.400307639 |
| 2944 | hsa-miR-936         | 1.283331763 | 7.061108283 | 2.434004379 |
| 3472 | IVGN-novel-miR_3472 | 1.283901406 | 13.21733838 | 2.434965626 |
| 3318 | IVGN-novel-miR_3318 | 1.294880971 | 12.04937919 | 2.453567515 |
| 3338 | IVGN-novel-miR_3338 | 1.306345799 | 12.86433188 | 2.473143237 |
| 1934 | hsa-miR-376b        | 1.31523858  | 3.507839149 | 2.488434788 |
| 3379 | IVGN-novel-miR_3379 | 1.320077576 | 3.928216001 | 2.49679535  |
| 3479 | IVGN-novel-miR_3479 | 1.344258952 | 10.95924925 | 2.53899746  |
| 3623 | IVGN-novel-miR_3623 | 1.349395204 | 12.13784174 | 2.548052855 |
| 3451 | IVGN-novel-miR_3451 | 1.350061721 | 2.671244181 | 2.549230313 |

|      |                             |             |             |             |
|------|-----------------------------|-------------|-------------|-------------|
| 3308 | IVGN-novel-miR_3308         | 1.359918669 | 4.132486168 | 2.566707094 |
| 3499 | IVGN-novel-miR_3499         | 1.368783788 | 12.95416312 | 2.582527636 |
| 3396 | IVGN-novel-miR_3396         | 1.36898716  | 11.74178523 | 2.582891713 |
| 2899 | hsa-miR-148a*               | 1.388687107 | 3.226392356 | 2.618402903 |
| 3223 | hsa-miR-891a                | 1.396201755 | 3.116396712 | 2.63207711  |
| 3222 | hsa-miR-518a-5p;hsa-miR-527 | 1.401834938 | 5.558040228 | 2.642374473 |
| 2986 | hsa-miR-492                 | 1.441444345 | 3.604548865 | 2.715926326 |
| 3535 | IVGN-novel-miR_3535         | 1.444248391 | 11.81710507 | 2.72121018  |
| 3426 | IVGN-novel-miR_3426         | 1.448781929 | 12.20110194 | 2.729774785 |
| 1064 | hsa-miR-100                 | 1.472845624 | 9.043823658 | 2.775688408 |
| 2221 | hsa-miR-574                 | 1.479478359 | 2.216712918 | 2.783666671 |
| 3382 | IVGN-novel-miR_3382         | 1.540756879 | 12.54418546 | 2.909471025 |
| 3174 | hsa-miR-923                 | 1.590118794 | 11.95744308 | 3.010741394 |
| 3337 | IVGN-novel-miR_3337         | 1.680139231 | 13.02249201 | 3.204588763 |
| 3354 | IVGN-novel-miR_3354         | 1.682456698 | 12.83262294 | 3.209740576 |
| 1409 | hsa-miR-146a                | 1.7022213   | 7.711808659 | 3.254015899 |
| 3383 | IVGN-novel-miR_3383         | 1.72520119  | 12.19813711 | 3.306262313 |
| 3311 | IVGN-novel-miR_3311         | 1.728572828 | 9.133790266 | 3.313998221 |
| 2969 | hsa-miR-637                 | 1.664242579 | 5.624555011 | 3.369472123 |
| 3104 | hsa-miR-920                 | 1.704438653 | 4.138110305 | 3.45902101  |
| 3319 | IVGN-novel-miR_3319         | 1.804272817 | 12.86065686 | 3.492530747 |
| 2995 | hsa-miR-638                 | 1.739275105 | 7.006930676 | 3.53867371  |
| 3578 | IVGN-novel-miR_3578         | 1.836212671 | 3.503068836 | 3.570714214 |
| 2108 | hsa-miR-760                 | 1.835925234 | 5.553666477 | 3.670002869 |
| 3699 | IVGN-novel-miR_3699         | 1.881456836 | 13.59851347 | 3.684469309 |
| 1752 | hsa-miR-495                 | 1.890302771 | 3.479501154 | 3.707130161 |
| 3695 | IVGN-novel-miR_3695         | 1.891360814 | 10.18651939 | 3.709849892 |
| 3000 | hsa-miR-199                 | 1.841983152 | 6.811339926 | 3.785024931 |
| 3001 | hsa-miR-296-3p              | 1.851282698 | 7.031256755 | 3.808208478 |
| 3445 | IVGN-novel-miR_3445         | 1.971388473 | 12.81061454 | 3.921453444 |
| 1865 | hsa-miR-383                 | 1.908258054 | 5.247314146 | 3.953556123 |
| 3316 | IVGN-novel-miR_3316         | 2.008446286 | 12.45067968 | 4.023486761 |
| 3701 | IVGN-novel-miR_3701         | 2.009491202 | 13.55918162 | 4.026401952 |
| 3279 | hsa-miR-513-5p              | 2.066422302 | 6.909196392 | 4.188466986 |
| 3327 | IVGN-novel-miR_3327         | 2.068295601 | 11.65005823 | 4.193909126 |
| 3003 | hsa-miR-323-5p              | 1.966364588 | 6.325853176 | 4.207821548 |
| 2239 | hsa-miR-610                 | 1.985860891 | 6.056566665 | 4.460989539 |
| 2942 | hsa-miR-10b*                | 2.165458439 | 3.08272922  | 4.486089611 |
| 3331 | IVGN-novel-miR_3331         | 2.188257523 | 13.08539536 | 4.557546965 |
| 1863 | hsa-miR-485-5p              | 2.026754847 | 6.403646005 | 4.674872296 |
| 3219 | hsa-miR-574                 | 2.127060397 | 9.659077196 | 4.768265052 |
| 3309 | IVGN-novel-miR_3309         | 2.256395852 | 12.9355193  | 4.777963562 |
| 3345 | IVGN-novel-miR_3345         | 2.282858731 | 12.47145384 | 4.86641289  |
| 3007 | hsa-miR-453                 | 1.697440567 | 5.632177655 | 4.943250744 |
| 2905 | hsa-miR-376c                | 2.356379219 | 3.405909979 | 5.120835514 |
| 2993 | hsa-miR-92b                 | 2.164699167 | 5.182359415 | 5.583729262 |
| 1189 | hsa-miR-297                 | 2.164905183 | 8.527502041 | 5.784369581 |
| 2997 | hsa-miR-185                 | 2.279315782 | 7.245108502 | 5.954476689 |
| 3218 | hsa-miR-672                 | 2.314449167 | 8.61604513  | 6.07414708  |
| 1805 | hsa-miR-595                 | 2.442219943 | 8.799414915 | 6.13477362  |
| 3608 | IVGN-novel-miR_3608         | 2.642054883 | 12.63057968 | 6.242201302 |
| 2988 | hsa-miR-885-3p              | 2.645093985 | 7.978912096 | 6.25536464  |
| 3013 | hsa-miR-194                 | 2.664444411 | 5.488367941 | 6.339831123 |
| 3387 | IVGN-novel-miR_3387         | 2.69257818  | 13.10581201 | 6.464676512 |
| 3537 | hsa-miR-630                 | 2.899184096 | 11.98115442 | 7.460043774 |
