# Supplementary material
Source: PubMed Central journal article supplement (PMC3131951)

Figure S7

**A.**

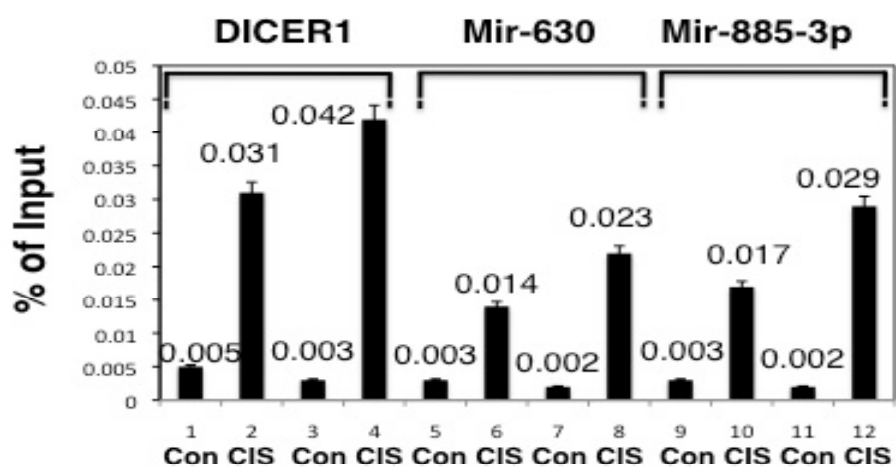

Antibodies:

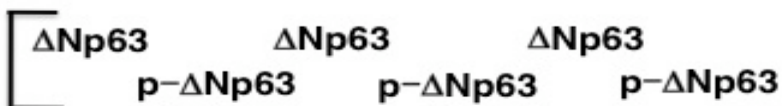

**B.**

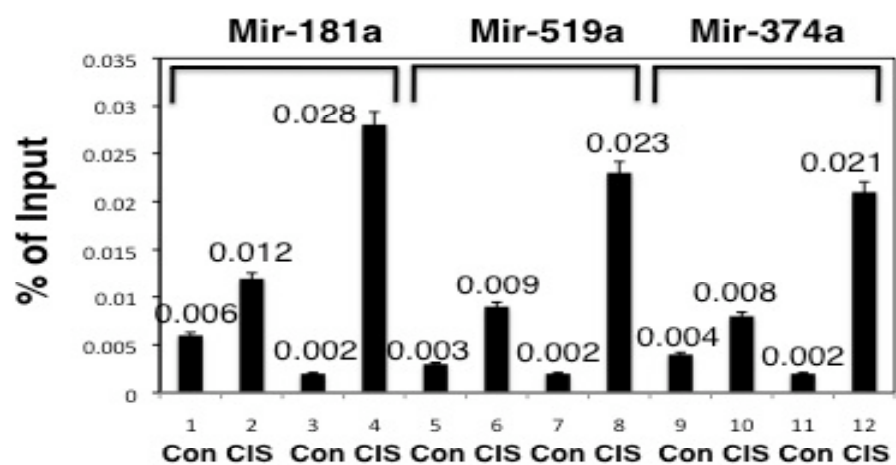

Antibodies:

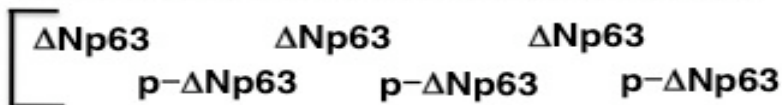

**C.**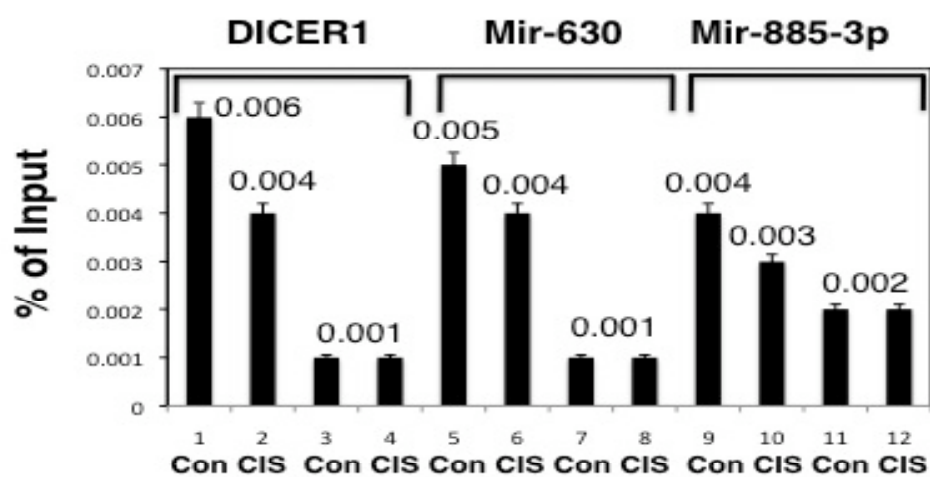

Antibodies:

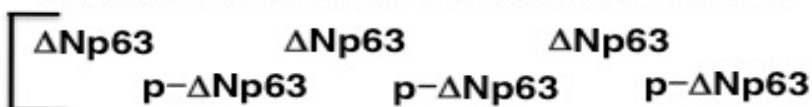**D.**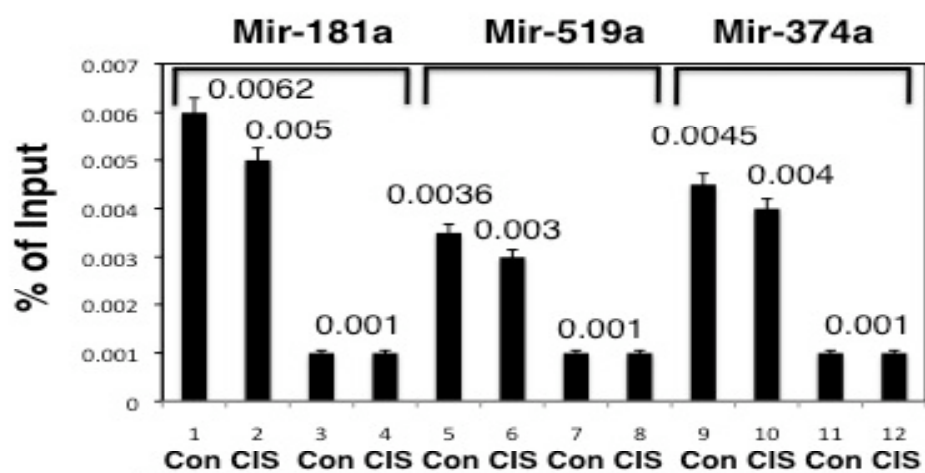

Antibodies:

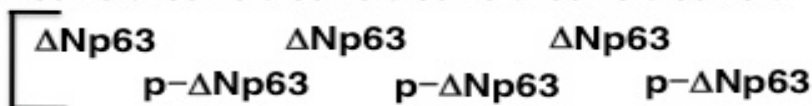

Supplement: cdd2010188x3.pdf [file cdd2010188x3.pdf]

Figure S17

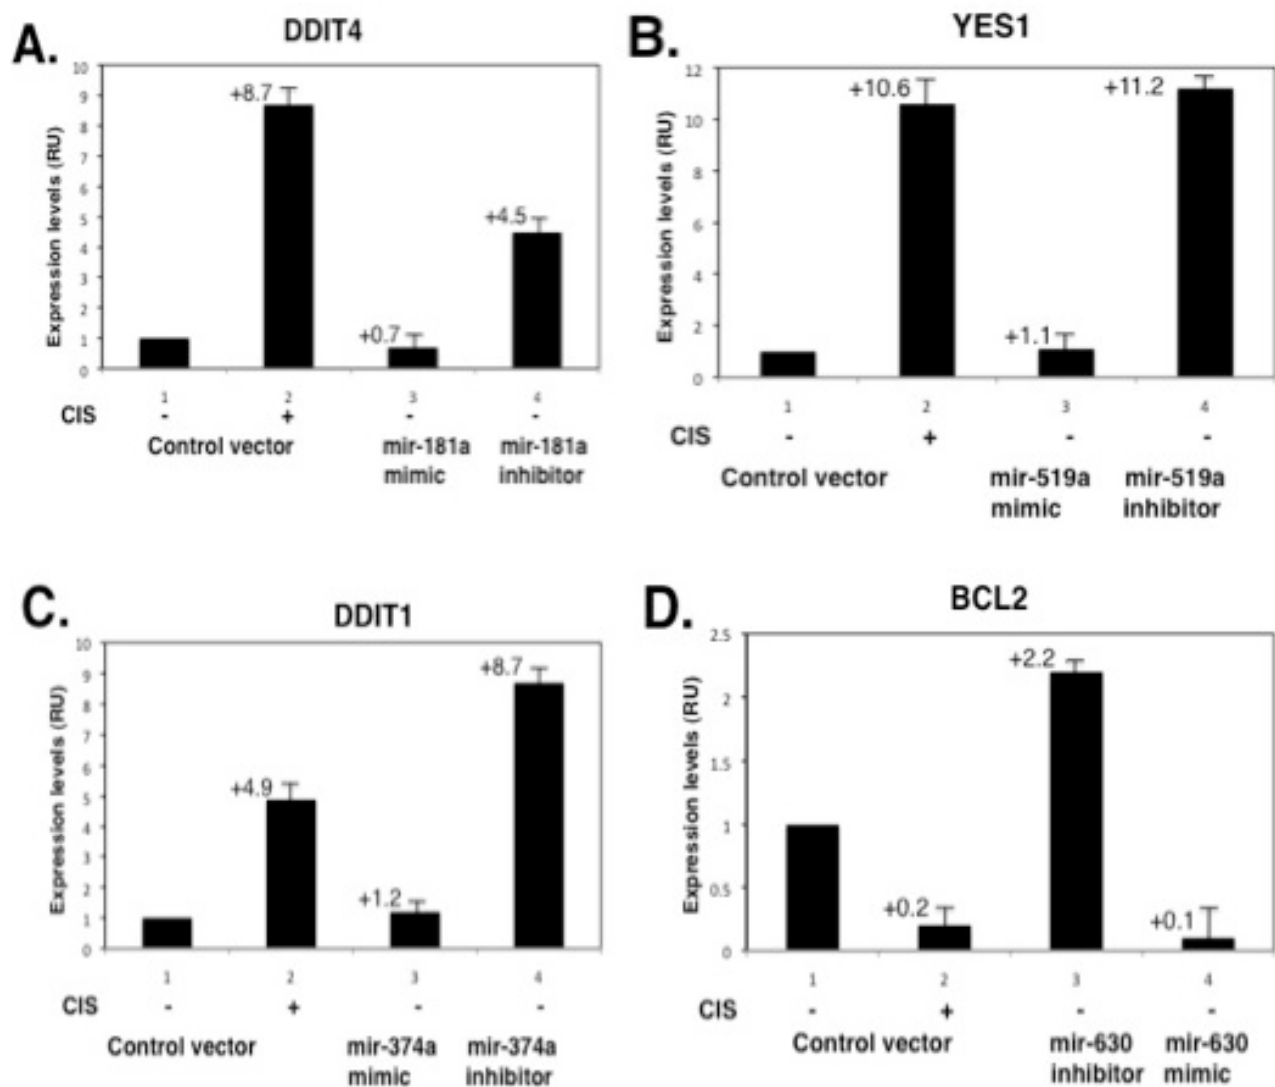

Supplement: cdd2010188x5.pdf [file cdd2010188x5.pdf]
